# Supplementary material for: A glia-enriched stem cell 3D model of the human brain mimics the glial-immune neurodegenerative phenotypes of multiple sclerosis
Source: PubMed Central journal article supplement — Cell Rep Med. 2024 Aug 8;5(8):101680. doi: 10.1016/j.xcrm.2024.101680 (PMC11384947; doi:10.1016/j.xcrm.2024.101680), 2024-08-08
Supplement: mmc12.pdf [file mmc12.pdf]

# A glia-enriched stem cell 3D model of the human brain mimics the glial-immune neurodegenerative phenotypes of multiple sclerosis

## Graphical abstract

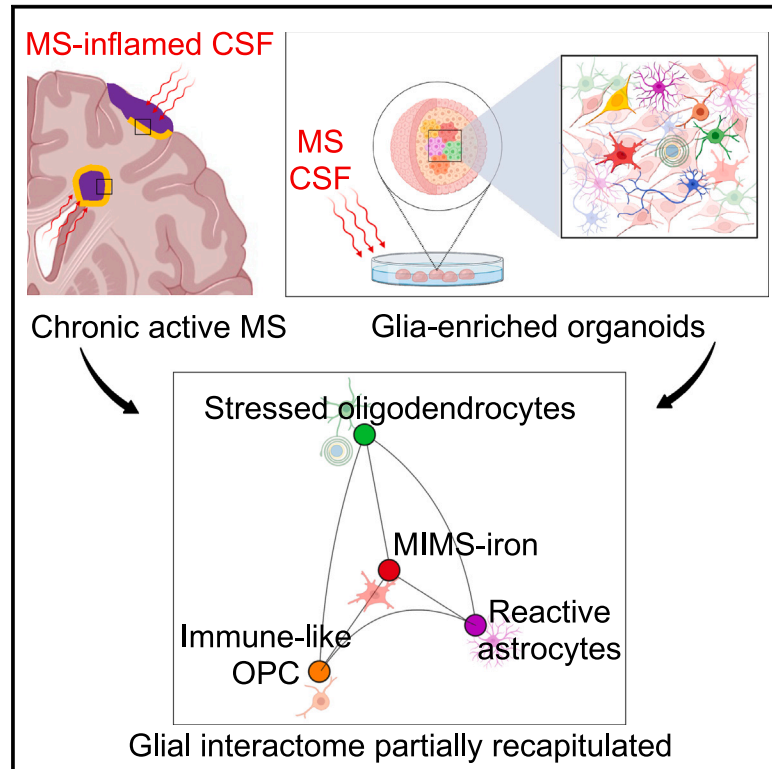

## Authors

Francesca Fagiani, Edoardo Pedrini, Stefano Taverna, ..., Gianvito Martino, Paola Panina-Bordignon, Martina Absinta

## Correspondence

absinta.martina@hsr.it

## In brief

Despite their role as drivers of clinical deterioration in multiple sclerosis, the molecular mechanisms driving the leading inflammatory edge of chronically inflamed lesions are poorly understood. Fagiani et al. propose an organoid platform recapitulating the diversity of central nervous system cell types in the human brain to investigate smoldering inflammation.

## Highlights

- *SOX10* induction fosters oligodendrocyte differentiation from neural precursor cells
- Glia-enriched organoids offer a rich diversity of CNS cells as in the adult human brain
- Inflamed CSF-stimulated organoids mimic neurodegenerative glial phenotypes seen in MS
- This model might provide a drug discovery platform to halt MS chronic inflammation

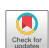

## Article

# A glia-enriched stem cell 3D model of the human brain mimics the glial-immune neurodegenerative phenotypes of multiple sclerosis

Francesca Fagiani,<sup>1</sup> Edoardo Pedrini,<sup>1</sup> Stefano Taverna,<sup>1</sup> Elena Brambilla,<sup>2</sup> Valentina Murtaj,<sup>2</sup> Paola Podini,<sup>1</sup> Francesca Ruffini,<sup>2</sup> Erica Butti,<sup>1</sup> Clarissa Braccia,<sup>3</sup> Annapaola Andolfo,<sup>3</sup> Roberta Magliozzi,<sup>4</sup> Lena Smirnova,<sup>5</sup> Tanja Kuhlmann,<sup>6</sup> Angelo Quattrini,<sup>1,2</sup> Peter A. Calabresi,<sup>7</sup> Daniel S. Reich,<sup>8</sup> Gianvito Martino,<sup>1,2</sup> Paola Panina-Bordignon,<sup>1,2</sup> and Martina Absinta<sup>1,2,7,9,\*</sup>

<sup>1</sup>Division of Neuroscience, IRCCS San Raffaele Scientific Institute, 20132 Milan, Italy

<sup>2</sup>Division of Neuroscience, Vita-Salute San Raffaele University, 20132 Milan, Italy

<sup>3</sup>ProMeFa, Proteomics and Metabolomics Facility, IRCCS San Raffaele Scientific Institute, 20132 Milan, Italy

<sup>4</sup>Department of Neurosciences, Biomedicine and Movement Sciences, University of Verona, 37124 Verona, Italy

<sup>5</sup>Center for Alternatives to Animal Testing, Department of Environmental Health and Engineering, Johns Hopkins University, Baltimore, MD 21205, USA

<sup>6</sup>Institute of Neuropathology, University Hospital of Münster, 48149 Münster, Germany

<sup>7</sup>Department of Neurology, Johns Hopkins University, Baltimore, MD 21205, USA

<sup>8</sup>Translational Neuroradiology Section, National Institute of Neurological Disorders and Stroke, National Institutes of Health, Bethesda, MD 20892, USA

<sup>9</sup>Lead contact

\*Correspondence: [absinta.martina@hsr.it](mailto:absinta.martina@hsr.it)

<https://doi.org/10.1016/j.xcrm.2024.101680>

## SUMMARY

The role of central nervous system (CNS) glia in sustaining self-autonomous inflammation and driving clinical progression in multiple sclerosis (MS) is gaining scientific interest. We applied a single transcription factor (SOX10)-based protocol to accelerate oligodendrocyte differentiation from human induced pluripotent stem cell (hiPSC)-derived neural precursor cells, generating self-organizing forebrain organoids. These organoids include neurons, astrocytes, oligodendroglia, and hiPSC-derived microglia to achieve immunocompetence. Over 8 weeks, organoids reproducibly generated mature CNS cell types, exhibiting single-cell transcriptional profiles similar to the adult human brain. Exposed to inflamed cerebrospinal fluid (CSF) from patients with MS, organoids properly mimic macroglia-microglia neurodegenerative phenotypes and intercellular communication seen in chronic active MS. Oligodendrocyte vulnerability emerged by day 6 post-MS-CSF exposure, with nearly 50% reduction. Temporally resolved organoid data support and expand on the role of soluble CSF mediators in sustaining downstream events leading to oligodendrocyte death and inflammatory neurodegeneration. Such findings support the implementation of this organoid model for drug screening to halt inflammatory neurodegeneration.

## INTRODUCTION

Multiple sclerosis (MS) is the most common chronic inflammatory, demyelinating, and neurodegenerative disease of the central nervous system (CNS), extensively involving the brain, spinal cord, and optic nerve.<sup>1</sup> Although currently approved disease-modifying treatments are effective in modulating peripheral immunity and reducing relapse-associated inflammatory activity, they fail to prevent disease progression and disability in a large proportion of patients.<sup>2</sup> To halt MS clinical progression, the role of the macroglia-microglia axis in sustaining chronic inflammation (e.g., at the leading edge of chronic active lesions)<sup>3</sup> and in limiting the restoration of tissue homeostasis is increasingly attracting scientific and pharmacological interest.<sup>2</sup>

In the absence of preclinical models of smoldering MS lesion formation and maintenance, we here report a 3-dimensional (3D) stem cell-derived model of the human brain as a reproducible and valuable tool to experimentally probe human CNS macroglia-microglia crosstalk. To be useful for this purpose, we envisioned that such a stem cell-based model would need to satisfy the following requirements: (1) harboring cellular lineage diversity to be as much as possible representative of the human brain, (2) displaying a high proportion of mature cells, and (3) achieving single-cell transcriptional similarity with neurodegenerative glial phenotypes seen in MS lesions.<sup>3</sup>

Our cellular platform consists of 3D multilineage submillimetric organoids integrating neural progenitor cell (NPC)-derived self-organizing forebrain organoids with human induced pluripotent stem cell (hiPSC)-derived microglia (also termed as

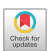

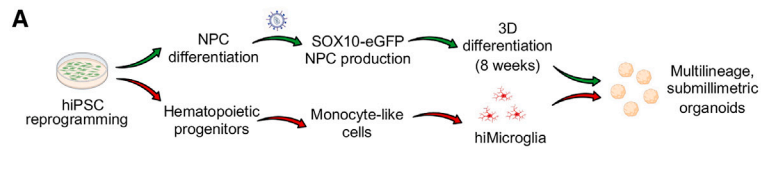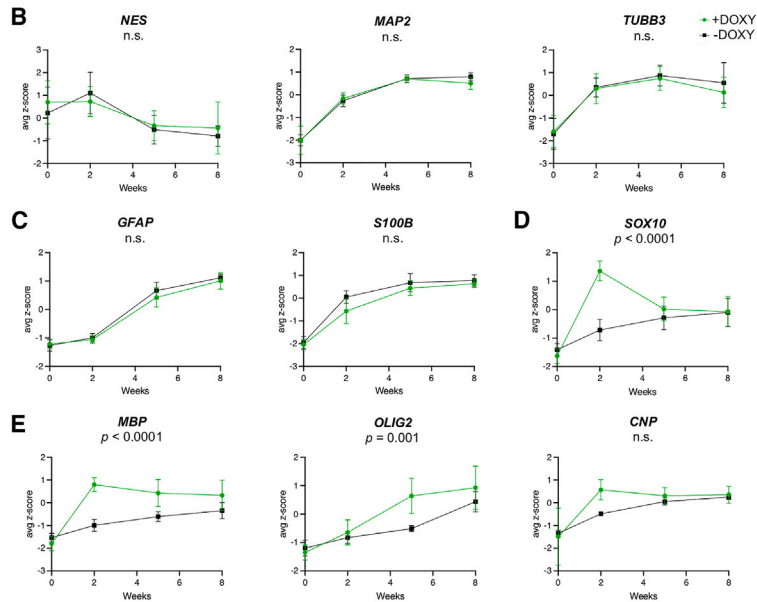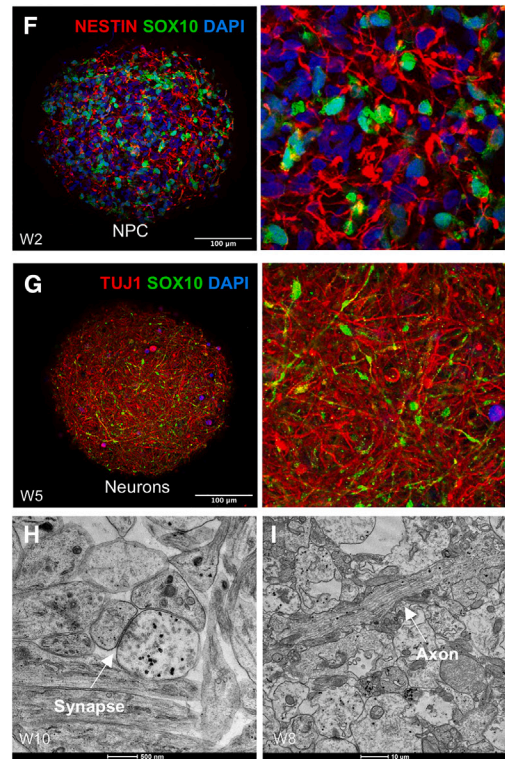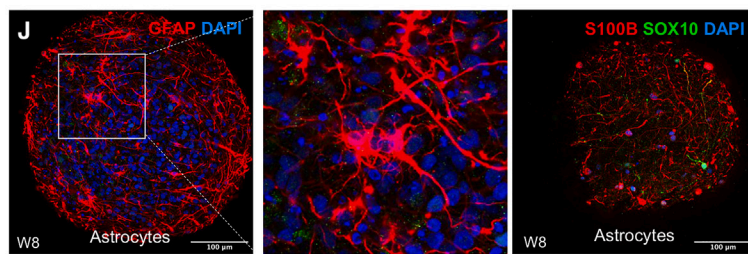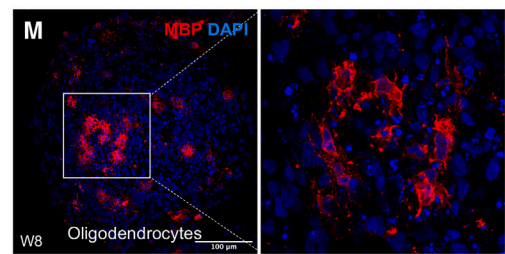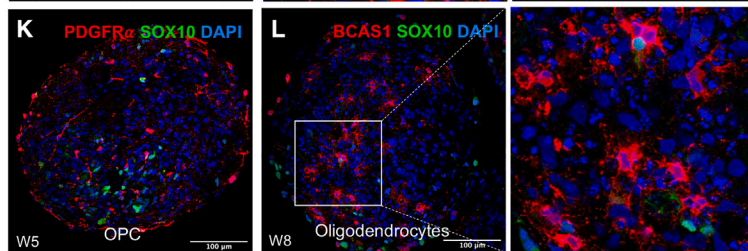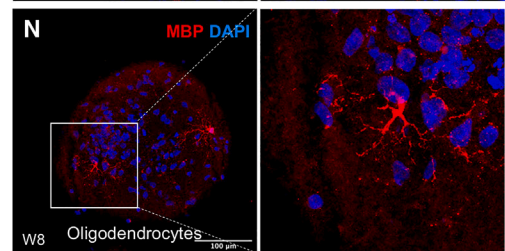

(legend on next page)

assembloids<sup>4</sup>; Figure 1A). They contain a mosaic of intermingled CNS cells (neurons, astrocytes, oligodendrocyte lineage cells, and microglia) that spatially and temporally overlap, allowing functional crosstalk among the different cell types. Recognizing major limits in the generation of long-lasting 2D cultures of oligodendrocytes (OLs), here, to accelerate oligodendrogenesis from hiPSC-derived NPC, we applied a single transcription factor (*SOX10*)-based protocol that promotes the commitment and the generation of a heterogeneous and stable pool of oligolineage cells, including oligodendrocyte progenitor cells (OPCs) and myelin basic protein-positive (MBP<sup>+</sup>) OLs, with a global gene expression profile comparable to primary human OLs.

Compared to other cellular models, the major advantage of this 3D platform relies on the presence of mature glial populations, including hiPSC-derived microglia, and neurons capable to respond to complex inflammatory stimuli and partially resembling the inflammatory environment of the human MS brain. The presence of all these glial subtypes, including the immune counterpart, is of key relevance to dissect clinically relevant mechanisms driving the unresolved inflammation and propagating tissue injury of chronic active MS lesions<sup>3,5</sup> and to provide a drug discovery platform for high-throughput screens of compounds tackling inflammatory demyelination and neurodegeneration.

## RESULTS

### Ectopic expression of *SOX10* transcription factor promotes oligodendrogenesis in hiPSC-derived organoids

To foster the generation of human OLs, we generated a lentiviral vector encoding the *SOX10* coding sequence and the green fluorescent protein (GFP) as a reporter gene under the control of a doxycycline-inducible promoter (Figure S1A). hiPSC-derived forebrain-patterned NPCs ( $n = 5$ , 2 from non-neurological controls and 3 from individuals with MS, Table S1) were infected with *SOX10*-eGFP-expressing lentivirus, and the stably infected cells were sorted by fluorescence-activated cell sorting gating on GFP<sup>+</sup> cells (Figure S1B). To recapitulate the complex cellular environment of the human brain *in vitro*, we sought to generate

controlled-sized, submillimetric (~450  $\mu\text{m}$  diameter), forebrain organoids (Figures S1C and S1D), consisting of neurons, astrocytes, and OLs, by optimizing previously published protocols.<sup>6</sup> We derived organoids from *SOX10*-eGFP NPCs exposed to glial induction medium, supplemented with triiodo-L-thyronine (T3), recombinant human neurotrophin-3 (rhNT3), recombinant human platelet-derived growth factor BB (PDGF-BB) homodimer, smoothed agonist, 2'-*o*-dibutyryl adenosine 3', 5'-cyclic adenosine monophosphate (dbcAMP) analog, insulin-like growth factor-1 (IGF-1), ascorbic acid (AA), and 1  $\mu\text{g}/\text{mL}$  doxycycline from day 1 to day 3 (as schematized in Figure S1E) (see STAR Methods for a detailed description).<sup>7,8</sup> On day 5, the medium was replaced with glial differentiation medium (GDM), supplemented with T3, rhNT3, IGF-1, AA, and dbcAMP, to promote OPC proliferation and maturation. Organoids were cultured in GDM until the end of the differentiation protocol. Doxycycline at the final concentration of 1  $\mu\text{g}/\text{mL}$  was added to GDM medium from day 5 until day 14 (Figure S1E).<sup>7,8</sup> On day 14, 10 ng/mL brain-derived neurotrophic factor (BDNF) and glial cell line-derived neurotrophic factor (GDNF) were added to support neuronal and glial trophism. Selected organoids from each cell line were not exposed to doxycycline (therefore no *SOX10* induction) and considered as negative controls.

First, to assess the maturation stages of organoids during the 8-week differentiation protocol, NPCs as well as 2-, 5-, and 8-week-old organoids (from 5 hiPSC lines) were collected for RNA extraction. The expression of a panel of neuronal, astrocyte, and OL markers was analyzed by real-time quantitative polymerase chain reaction (real-time qPCR); their longitudinal expression was compared in organoids exposed vs. not exposed (negative control) to doxycycline for 14 days. The gene expression of *NES*, a neural stem/progenitor cell marker (*NESTIN*), remained similar to NPCs until 2 weeks of differentiation when the expression started to decrease (Figure 1B). At the end of the differentiation protocol, the remaining *NES* expression indicates the presence of a small population of NPCs, as well as other proliferating cell types, such as OPCs and astrocytes. Accordingly, immunofluorescence analyses showed a net reduction in Nestin<sup>+</sup> and Pax6<sup>+</sup> cells through the differentiation process (Figures S1I and S1J). Compared to NPCs, after 2 weeks

#### Figure 1. *SOX10* transcription factor accelerates oligodendrogenesis in hiPSC-derived organoids

- (A) Schematic representation of the protocol for generating submillimetric organoids and integrating hiPSC-derived microglia.  
 (B–E) Gene expression (normalized to GAPDH) of *NES*, *TUBB3*, *MAP2*, *GFAP*, *S100B*, *SOX10*, *MBP*, *OLIG2*, and *CNP* in *SOX10*-eGFP organoids—exposed and not exposed to doxycycline for inducing *SOX10* expression—at 2, 5, and 8 weeks of differentiation, as determined by real-time qPCR (mixed effect analysis, followed by multiple comparison test) (for doxycycline-treated organoids: RNA samples each consisting of ~150 organoids from 5 hiPSC lines from 2 differentiation experiments; for doxycycline-untreated organoids: RNA samples each consisting of ~150 organoids from 5 hiPSC lines from 1 differentiation experiment). Data are represented as average Z score  $\pm$  SD.  
 (F) Immunostaining of Nestin<sup>+</sup> and SOX10<sup>+</sup> cells in doxycycline-treated organoids after 2 weeks of differentiation (magnification, 30X).  
 (G) Immunostaining of Tuj1<sup>+</sup> and SOX10<sup>+</sup> cells in doxycycline-treated organoids after 5 weeks of differentiation (magnification, 30X).  
 (H) Electron microscopy images of doxycycline-treated organoids after 10 weeks of differentiation showing a synaptic junction containing vesicles (white arrowhead).  
 (I) Electron microscopy images of doxycycline-treated organoids after 8 weeks of differentiation showing axonal projections (white arrowhead).  
 (J) Immunostaining of GFAP<sup>+</sup> (30X) and S100B<sup>+</sup> cells (30X) in cryosections from 8-week-old doxycycline-treated organoids.  
 (K) Immunostaining of PDGFR $\alpha$ <sup>+</sup> and SOX10<sup>+</sup> cells in cryosections from 5-week-old doxycycline-treated organoids (30X).  
 (L) Immunostaining of BCAS1<sup>+</sup> and SOX10<sup>+</sup> cells in cryosections from 8-week-old doxycycline-treated organoids (30X).  
 (M and N) Immunostaining of MBP<sup>+</sup> cells in cryosections from 8-week-old doxycycline-treated organoids (30X).  
 (O) Electron microscopy images of organoids showing myelination at different time points (additional examples in Figure S2C).  
 (P) Immunolabeling of TMEM119<sup>+</sup> cells and MAP2<sup>+</sup> in cryosections from 9-week-old organoids (30X).  
 (Q) Immunolabeling of IBA1<sup>+</sup> cells, MBP<sup>+</sup>, and MAP2<sup>+</sup> cells in cryosections from 9-week-old organoids (30X). Abbreviations: NPC, neural precursor cells.

of differentiation, we also observed a significant increase in the gene expression of both neuronal (i.e., *MAP2* and *TUBB3*) (Figure 1B) and astrocyte markers (i.e., *GFAP* and *S100B*) (Figure 1C). As expected, no differences in the expression of neuronal and astrocyte markers were observed between organoids stimulated with doxycycline compared to the non-stimulated ones. To confirm the doxycycline-induced increase in *SOX10* expression, we analyzed *SOX10* mRNA expression, demonstrating a significant increase after 2 weeks of differentiation in organoids exposed to doxycycline compared to negative control conditions (Figure 1D). As expected, after doxycycline discontinuation, *SOX10* expression started to decrease. With respect to OPC and mature OL lineage markers, a significant increase in *MBP* and *OLIG2* gene expression was observed in organoids exposed to doxycycline compared to untreated organoids (Figure 1E). We observed significantly higher *MBP* mRNA levels after 2 weeks of differentiation in organoids stimulated with doxycycline, suggesting that *SOX10* induction directly promoted its expression. As expected, *OLIG2* gene expression started to increase after 5 weeks of differentiation. Such evidence is consistent with data indicating that *OLIG2*, besides acting as an upstream regulator of *SOX10* expression in OPCs, also directs chromatin remodeling to potentiate the expression of several myelin-related factors that initiate OPC differentiation into OLs (Figure 1E).<sup>9,10</sup>

Next, by immunofluorescence analysis, we observed the maturation of NPCs (Figure 1F) into an intricate network of Tuj1<sup>+</sup> (Figure 1G) and MAP2<sup>+</sup> (Figures S1G and S1H) neurons after 5 weeks of differentiation (without any cortical layer-like pattern), with axonal projections (Figures 1I and S2B) evident on transmission electron microscopy. Ultrastructural analysis revealed the presence of synaptic junctions, capturing processes of synaptic vesicle fusion with docked vesicles in contact with the plasma membrane in the active zone (Figure 1H; Figure S2A). To confirm functional interactions between neurons in organoids, we performed electrophysiological recordings on 12-week-old organoids using whole-cell patch clamp recordings. Repetitive firing of action potentials (indicating a mature, neuronal-like functional profile) was observed in response to suprathreshold current injection in 10 out of the 49 cells tested (20.4%; Figure S1F) (mean spike frequency was  $10.8 \pm 1.2$  Hz). These neurons displayed sizable Na<sup>+</sup> and K<sup>+</sup> currents in response to step voltage commands from  $-70$  to  $-10$  mV (Figure S1F), with average peak amplitudes of  $2,864 \pm 470$  pA and  $1,560 \pm 338$  pA, respectively. In 7 of the neurons, we also recorded a mixture of spontaneous excitatory and inhibitory postsynaptic currents (Figure S1F). Astrocytes were also clearly identified in 8-week-old organoids, as showed by the presence of GFAP<sup>+</sup> and S100B<sup>+</sup> cells with typical astrocyte morphology (Figure 1J).

Concerning the OLs, by 5 weeks of differentiation, PDGFRa<sup>+</sup> cells were detected, indicating OPC proliferation (Figure 1K). By 8 weeks of differentiation, we observed OL maturation indicated by the presence of breast carcinoma amplified sequence 1 (BCAS1)<sup>+</sup> cells, accounting for a population of newly formed, myelinating OLs marking regions of active myelin formation (Figure 1L). In addition, we detected MBP<sup>+</sup> cells with a highly branched morphology after 8 weeks of differentiation (Figures 1M and 1N). As proof of myelination, *SOX10*-eGFP organoids treated with

doxycycline were imaged with transmission electron microscopy at 4, 8, and 12 weeks of differentiation, demonstrating the presence of various stages of myelination, including early myelination processes and myelin wraps surrounding axons (Figures 1O and S2C).

Since microglia originate from yolk sac erythromyeloid progenitors generated during primitive hematopoiesis,<sup>11</sup> to achieve an immunocompetent organotypic model, we generated in parallel iPSC-derived human microglia (hiMicroglia), according to the two-step protocol of Abud et al.<sup>12</sup> On day 34 of differentiation, microglia morphology (small cell body and ramified processes), as well as the presence of typical human microglial markers (CD11B, CD45, and TMEM119), was confirmed by immunofluorescence in a 2D culture of hiMicroglia (Figures S1K and S1L). Then, hiMicroglia were incorporated in 8-week-old organoids producing hiAssembloids.<sup>4</sup> After 24 h, hiMicroglia spontaneous migration and integration into the neuron-glia network was observed, as confirmed by immunostaining on 15- $\mu$ m-thick cryosections showing IBA1<sup>+</sup> and TMEM119<sup>+</sup> cells intermingled with neurons and glia (Figures 1P, 1Q, and S1M-S1P), thereby supporting the widely described microglia mobility and motility.

### Single-cell RNA sequencing unraveled the cellular diversity of organoids

To comprehensively characterize the cellular landscape of our model, we performed single-cell RNA sequencing (scRNA-seq) of the 8-week-old *SOX10*-eGFP-expressing organoids with hiMicroglia (both exposed and nonexposed to doxycycline) and organoids obtained based on a standard protocol (Gibco, a well-established and commercially available protocol to produce 3D brain organoids). After standard preprocessing, we generated data for a total of 29,319 single cells from 9 individual samples, generated from 5 independent stem cell lines (Table S2). Overall, 22,089 distinct transcripts were detected. Unsupervised clustering identified 17 initial clusters, rendered as uniform manifold approximation and projection (UMAP) (Figure 2A). The annotation was performed using known lineage marker genes (Figures 2B and S3A). For uncertain assignment, we relied on the hallmark lineage genes of each cluster (top 100 positive differentially expressed genes against all the other cells) and performed over-representation analysis, using a panel of annotations (KEGG 2021, Human MSigDB Hallmark 2020, Reactome 2016, Human Gene Atlas Azimuth Cell Types 2021).

We identified distinct populations of neurons, astrocytes, OPCs, OLs, and immune cells. We observed the presence of different types of neurons, such as *GAD2*<sup>+</sup> inhibitory and excitatory neurons, some showing upper (*CUX2*<sup>+</sup>) vs. lower (*TLE4*<sup>+</sup>) cortical layer specification (Figure 2B). In accordance with the forebrain-oriented differentiation pattern, we did not observe the presence of dopaminergic neurons. We also observed the presence of mature astrocytes expressing typical astrocyte lineage markers, such as *AQP4*, *GFAP*, *VIM*, and *S100B* (Figure 2B). One oligolineage cluster (cluster 2) was annotated as OPCs (*SOX10*<sup>+</sup>, *OLIG1*<sup>+</sup>, *OLIG2*<sup>+</sup>, and *PDGFRa*<sup>+</sup>) (Figure 2B). As expected, myelin genes (i.e., *MBP*, *PLP1*, and *MAG*) and *BCSA1* were differentially expressed in the oligolineage cluster (cluster 16) than in the OPC cluster (cluster 2) (Figure 2B). As expected,

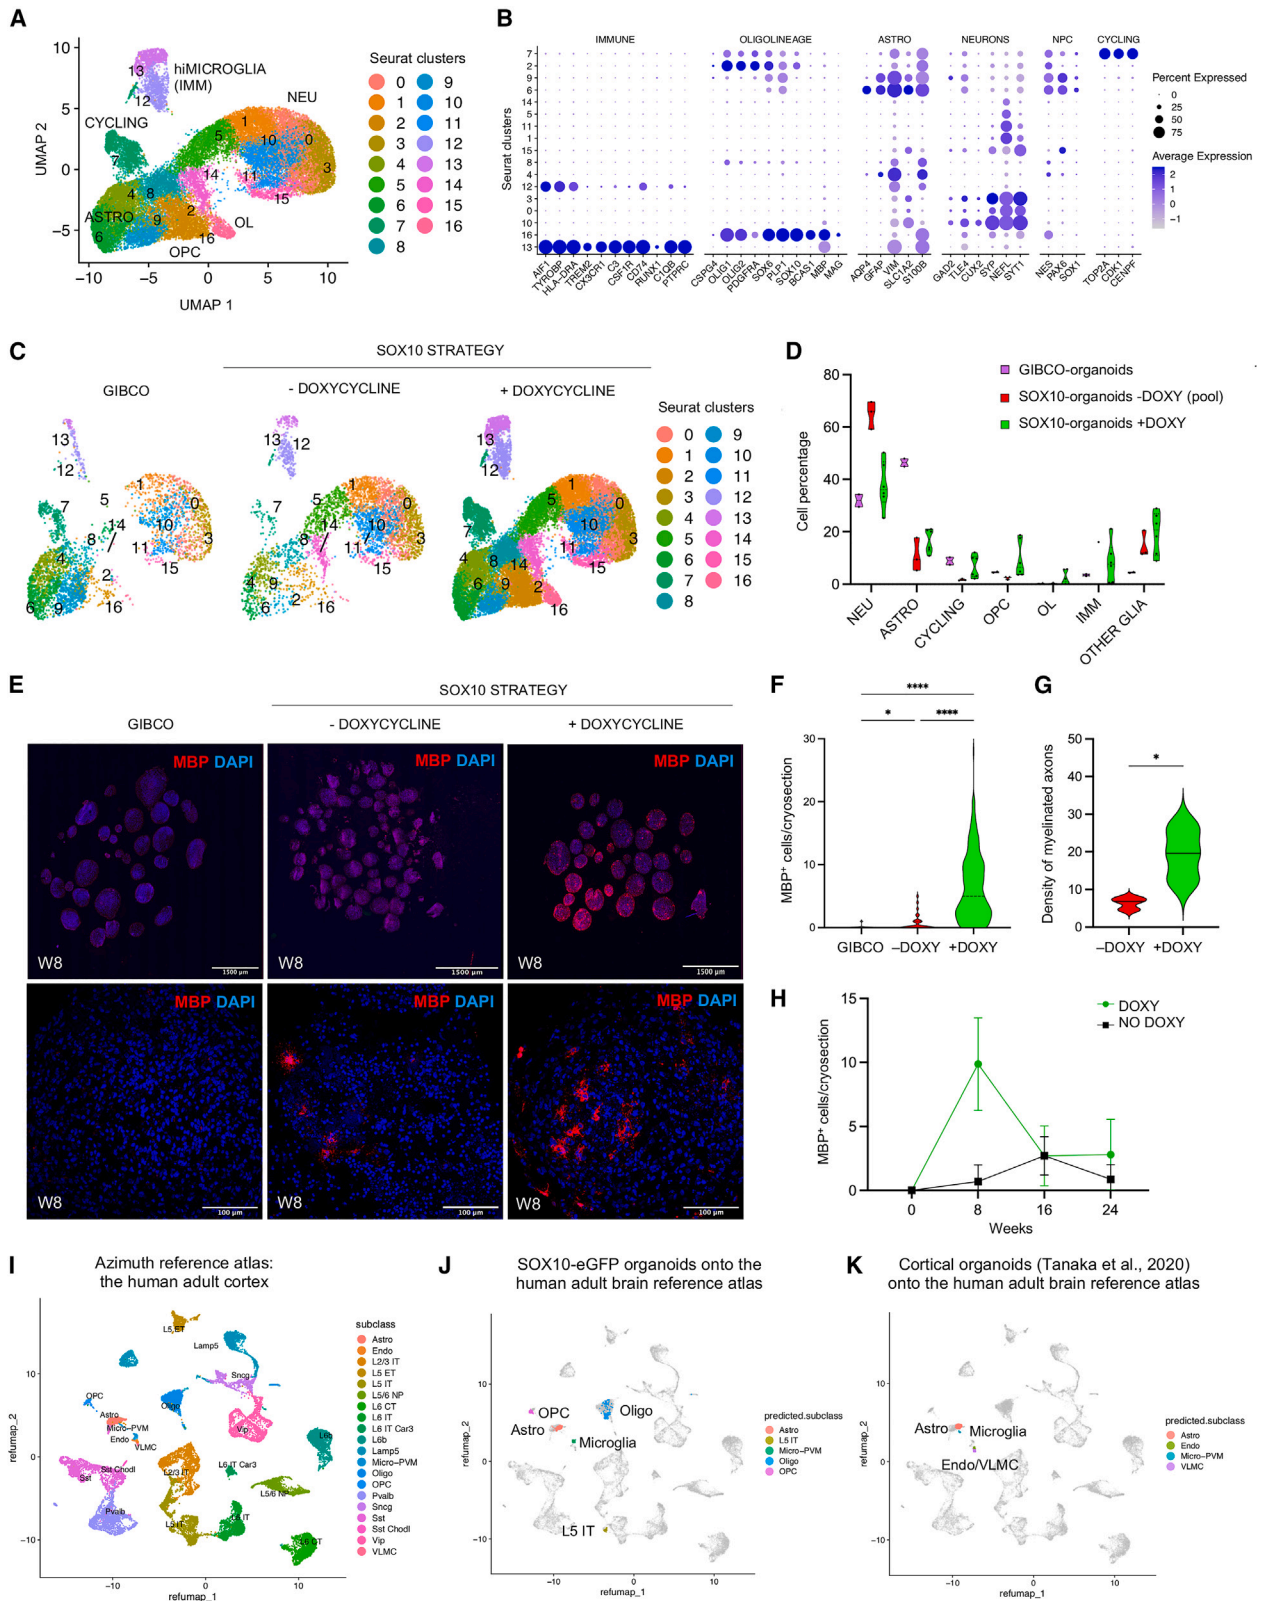

(legend on next page)

SOX10<sup>+</sup>-expressing cells were mainly restricted to oligolineage cells and some of the cycling cells of cluster 7 (Figure S3B). The hiMicroglia clusters (cluster 12 and 13) showed similar patterns of marker expression (*AIF1*, *TYROBP*, *HLA-DRA*, *TREM2*, *CX3CR1*, *C3*, *CSF1R*, *C1QB*, and *PTPRC*) as the human microglia (Figure 2B). In addition, we observed the presence of a pool of cycling and proliferating cells with enriched expression of cell-cycle-related genes (*TOP2A*, *CDK1*, and *CENPF*) (Figure 2B). Cell cycle scoring confirmed these cells as being in the G2M/S phase, whereas the other clusters were mainly in the G1 phase of the cell cycle (Figure S3B). The lists of the top 100 positive differentially expressed genes for each cluster against all the others are provided as supplemental information (Table S3).

In line with prior reports,<sup>15–17</sup> compared to astrocytes derived from control hiPSC lines, MS-derived astrocytes showed an enrichment in self-antigen presentation, extracellular matrix organization, inflammatory signaling (i.e., interferon signaling, IL-4 and IL-13 signaling), as well as response to hypoxia (Table S4). Compared to control-derived neurons, MS-derived neurons showed an enrichment in cell energy-related terms (i.e., mitochondrial electron transport and oxidative phosphorylation) and cholesterol biosynthesis (Table S4). When compared to control-derived OPC, MS-derived OPC showed an enrichment in cellular response to oxidative stress (Table S4). No major differences were seen in the transcriptional profile of MS vs. control-derived OLs.

To test the efficiency of SOX10 strategy in promoting OL maturation, we compared OL differentiation in 8-week-old organoids obtained based on Gibco protocol with our SOX10-eGFP-expressing organoids, stimulated vs. not stimulated with doxycycline. The Gibco protocol did not produce mature OLs (Figure 2C). On the other hand, organoids generated using our SOX10 strategy contained a significantly higher and heterogeneous pool of oligolineage cells, such as OPCs and mature OLs (Figures S3C and S3D), without affecting the differentiation of the neuronal and astrocyte lineage cells, thus demonstrating that SOX10 induction in hiPSC-derived NPCs is per se sufficient

to rapidly generate a heterogeneous pool of oligolineage cells (Figures 2C and 2D).

To corroborate these results, the density of MBP<sup>+</sup> cells was also quantified in whole 15- $\mu$ m-thick cryosections from 8-week-old organoids by immunofluorescence, showing a significant increase in organoids stimulated with doxycycline (average of 6.4 highly branched MBP<sup>+</sup> cells/organoid cryosection), compared to other experimental conditions (Figures 2E and 2F). Only sparse MBP<sup>+</sup> cells were found in organoids not stimulated with doxycycline at week 8 (Figures 2E and 2F), likely due to their exposure to specific factors (i.e., AA and T3) in the culture medium that can by themselves support OL differentiation and maturation. In those organoids not stimulated with doxycycline, we observed more MBP<sup>+</sup> cells after 16 weeks of differentiation, suggesting that OL maturation occurs later in the absence of doxycycline stimulation (Figures 2H, S3E, and S3F). By electron microscopy, the quantification of myelinated axons showed either the absence or very low density of myelinated axons in doxycycline-untreated organoids compared to doxycycline-treated organoids (mean  $\pm$  SEM 6.4  $\pm$  0.9 vs. 19.4  $\pm$  4.1 myelinated axons/1,000  $\mu$ m<sup>2</sup>, respectively,  $p = 0.04$ ) (Figure 2G).

### Organoids partially recapitulate the cell diversity of the human adult cortex

To assess the transcriptional similarity between cell types in the organoids and CNS cells of the adult vs. fetal human brain, we mapped our single-cell data onto two different reference atlases using Azimuth: (1) a scRNA-seq reference atlas of the adult human primary motor cortex from individuals without neurological disease (Figure 2I)<sup>13,18</sup> and (2) a scRNA-seq reference atlas of the fetal human brain (72–129 days of postconceptual age).<sup>19</sup> The mapping process allowed the identification of cells with a high mapping score (>0.75) more frequently on the adult than the fetal human brain suggesting the presence of mature cells in our 3D *in vitro* platform (Figure 2J; Figure S3G).

## Figure 2. Single-cell RNA sequencing (scRNA-seq) unraveled the cellular diversity of organoids, recapitulating the cell diversity of the human adult cortex

(A) scRNA-seq clustering of 29,319 cells, labeled based on known lineage markers and visualized as UMAP plot, from 8-week-old organoids deriving from SOX10-eGFP-expressing NPCs that were exposed to doxycycline for 2 weeks to promote SOX10 induction. Each dot corresponds to a single cell and each color to a cell cluster.

(B) Dot plot depicting selected differentially expressed genes for each cluster and associated cluster labeling. Dot size corresponds to the percentage of cells expressing the gene in each cluster, and the color represents the average expression level.

(C) scRNA-seq UMAP clustering from organoids produced based on the Gibco protocol ( $n = 3,660$  cells) and SOX10 strategy, exposed ( $n = 21,380$  cells) and not exposed to doxycycline ( $n = 4,279$  cells), at 8 weeks of differentiation.

(D) Violin plot showing the percentages of different cell populations by protocol.

(E) Immunostaining of MBP<sup>+</sup> cells in 15- $\mu$ m-thick cryosections containing multiple 8-week-old organoids produced based on the commercially available Gibco protocol vs. our SOX10 strategy both exposed and not exposed to doxycycline (top row: 10X; bottom row [magnified view of one organoid]: 30X).

(F) Quantification of branched MBP<sup>+</sup> cells in cryosections (estimated cryosection area = 0.2  $\mu$ m<sup>2</sup>) from 8-week-old organoids produced based on the different differentiation protocols ( $n = 6$  samples, each consisting of 30 cryosections derived from 5 hiPSC lines).

(G) Quantitative analysis of myelinated axons/1,000  $\mu$ m<sup>2</sup> area for doxycycline-stimulated organoids vs. doxy-minus organoids ( $n = 3$ ).

(H) Quantification of branched MBP<sup>+</sup> cells in cryosections from organoids at 8, 16, and 24 weeks of differentiation (30 cryosections for each time point from 1 hiPSC line).

(I) Reference atlas of the adult human primary motor cortex from cases without neurological disease (Azimuth).<sup>13</sup>

(J) Mapping of 3D organoids single-cell data (color-coded) onto a reference atlas of the adult human primary motor cortex (gray dots, H).<sup>13</sup>

(K) Mapping of single-cell transcriptome profiles of human cortical organoids from eight different protocols collected from public resources (differentiation range ~60/70 days) (dataset metanalysis available in Tanaka et al.<sup>14</sup>) on the reference atlas of the adult human primary motor cortex (gray dots, H).<sup>13</sup> Abbreviations are as follows: NEU, neurons; ASTRO, astrocytes; OPC, oligodendrocyte precursor cells; OL, oligodendrocytes; NPC, neural precursor cells; hiMICROGLIA (IMM), myeloid immune cells (hiPSC-derived microglia); OTHER GLIA, immature astrocytes; + DOXY, doxycycline-treated; – DOXY, not treated with doxycycline; Micro-PVM, microglia-perivascular macrophages; Endo, endothelia; and VLMC, vascular and leptomeningeal cells.

**A** Developmental trajectory of NPC-derived cells

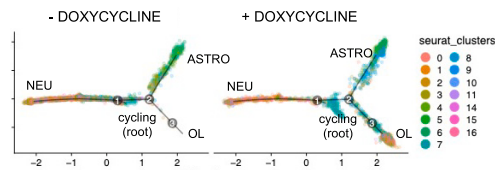

**B** Branch point 1

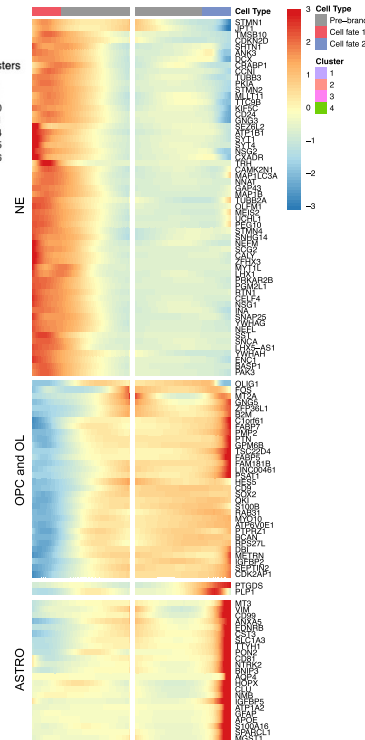

**C** Branch point 2

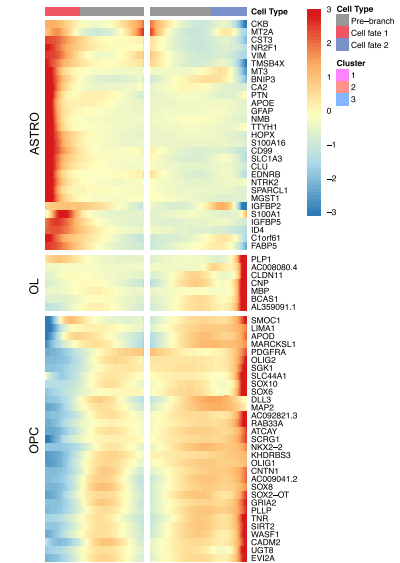

**D** - DOXYCYCLINE + DOXYCYCLINE

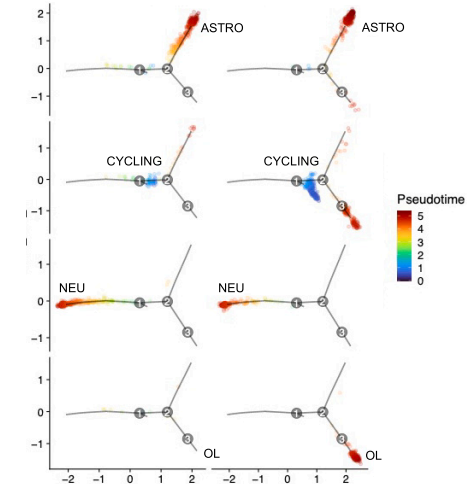

**E** SOX10-eGFP NPCs → OPC → Premyelinating OL → MBP OLs

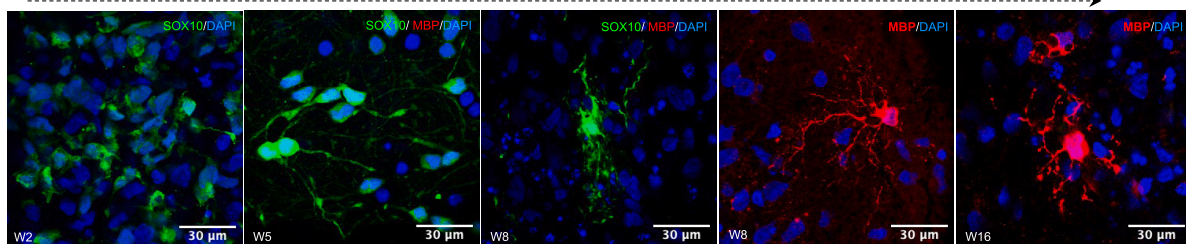

**F** Interaction weights/strength

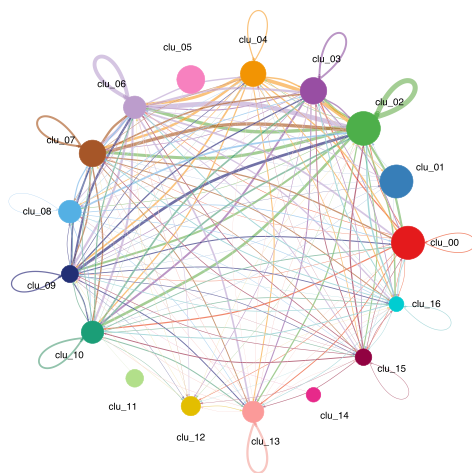

**G** Outgoing signaling patterns

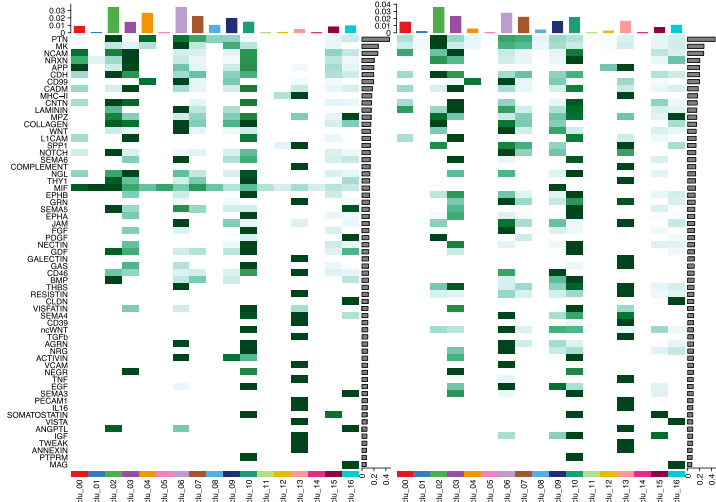

Incoming signaling patterns

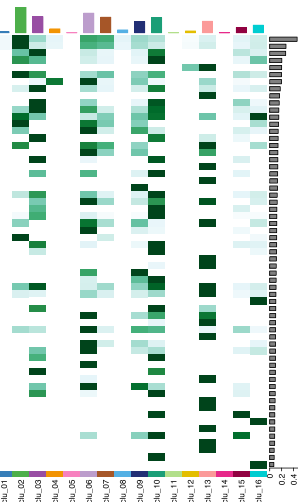

(legend on next page)



Notably, the maturation stage of organoids profoundly distinguishes our organoid model from previously published cortical brain organoids.<sup>20–27</sup> Cortical brain organoids are 3D cellular structures recapitulating the developing cellular architectural layering of the human cortex around a central pseudo-ventricle cavity and allowing the study of physiological and pathological processes occurring during neurodevelopment.<sup>28</sup> To confirm the difference between our organoid model and cortical organoids, we re-analyzed single-cell transcriptome profiles of human cortical organoids from 8 different protocols collected from public resources<sup>20–27</sup> (differentiation range ~60/70 days; dataset metanalysis available in the study by Tanaka et al.<sup>14</sup>) and, similarly, we mapped them on the reference atlases of the adult vs. fetal human brain. Of note, using a high mapping score (>0.75), in cortical brain organoids,<sup>20–27</sup> only astrocytes showed the transcriptional profile of their corresponding cells in the adult cortex. We did not find any cells with a transcriptional profile of adult OLs (Figure 2K; Figure S3H).

In summary, these results indicate that, differently from cortical brain organoids modeling the developing brain, our multilineage organoids represent an alternative and simplified cellular platform enriched by a higher proportion of mature CNS cell types.

### Pseudotime trajectory analysis recapitulates the prominent differentiation paths for NPC-derived cells

To delineate the developmental trajectory tracing the lineage specification of NPCs in organoids as they differentiate, we used an unsupervised algorithm (Monocle) to show single-cell gene expression kinetics over time and order cells by progress through differentiation.<sup>29</sup> Monocle reconstructed a trajectory capturing the progression of single cells through differentiation, which contains three termini (denoted “NEU,” “ASTRO,” and “OL”) corresponding to three different differentiation outcomes. To reach these outcomes, cells passed through two prominent branchpoints (denoted “1” and “2”) (Figure 3A), suggesting that NPCs can follow two distinct cell lineages. Cluster 7 (cycling cells) was defined as the root of the trajectory. A global differential analysis comparing the two paths away from branchpoint 1 indicated 115 genes with branch-dependent expression (qval = 0) (Figure 3B) (NEU branch-associated genes, i.e., *GNG3*, *SEZ6L2*, *ATP1B1*, *SYT1*, *SYT4*, *NSG2*, *SNHG14*, *NEFM*, *CALY*, *SNAP25*, and *NEFL*; vs. glia [ASTRO and OL] branch-associated genes, i.e., *VIM*, *CD99*, *ANXA5*, *EDNRB*, *CST3*, *SLC1A3*, *AQP4*, *CLU*, *ATP1A2*, *GFAP*, *APOE*, *S100A16*, and *SPARCL1*).

Branch-dependent expression analysis at branchpoint 2 showed significant changes in 67 genes with ASTRO- and OL-dependent expression (ASTRO branch-associated genes, i.e., *VIM*, *APOE*, *GFAP*, *SPARCL1*, *AQP4*, *S100A16*, *CD99*, *SLC1A3*, and *CLU* vs. OL branch-associated genes, i.e., *PLP1*, *CLDN11*, *CNP*, *MBP*, *BCAS1*, *PDGFRA*, *OLIG2*, *SOX10*, *SOX6*, *NKX2-2*, and *OLIG1*) (qval ~0) (qval < 10<sup>-170</sup>) (Figure 3C). The developmental trajectories split by clusters show the distribution of cells within each cluster along the branches based on their differentiation stage (see representative trajectories of selected mature NEU, ASTRO, and oligolineage clusters in Figure 3D). Notably, the analysis revealed a spectrum of oligolineage stages ranging from OPCs expressing *PDGFRA*, *SOX10*, *SOX6*, *NKX2-2*, *OLIG2*, and *OLIG1*, to OLs expressing myelin genes (*PLP1* and *MBP*) (Figure 3C). Consistently, we confirmed by immunofluorescence analysis the developmental progression of the hiPSC-derived oligolineage cells during the differentiation protocol: they progress from SOX10-eGFP NPCs to bipolar OPCs to premyelinating OLs to highly branched MBP<sup>+</sup> OLs (Figure 3E). Premyelinating OLs were identified as SOX10-eGFP<sup>+</sup> cells characterized by a branched morphology that did not colocalize with either MBP<sup>+</sup> cells or GFAP<sup>+</sup> cells, suggesting that these cells are neither myelinating OLs nor astrocytes.

By examining the highly differentially expressed genes between the two trajectories, we concluded that branchpoint 1 represents a decision point corresponding to whether a cell will follow a neuronal or glial differentiation route, while branchpoint 2 is a check point governing whether, having followed the glial lineage route, it will differentiate in either astrocyte or OLs, mimicking what is known to happen during the neurodevelopment. Of note, the ectopic *SOX10* induction by doxycycline did not alter the maturation trajectory of neurons and astrocytes, but only OL commitment (Figures 3A and 3D).

### Inference on cell-to-cell communication identifies patterns between neuronal, glial, and immune cells

To predict the global intercellular communication in organoids, we employed CellChat,<sup>30</sup> a tool to quantitatively infer and analyze cell-cell communication networks from scRNA-seq datasets, based on a signaling ligand-receptor interaction database (Figure 3F).<sup>30</sup> CellChat analysis on scRNA-seq data detected 1,138 significant ligand-receptor interactions among the 17 cell clusters, which were categorized into 142 signaling pathways. First, we explored how multiple cell populations and signaling pathways coordinate to function, by employing a

### Figure 3. Pseudotime trajectory of the differentiation paths for NPC-derived cells and cell-to-cell communication patterns

- (A) Pseudotime trajectory analysis of NPC-derived neuronal, astrocyte, and oligolineage cells, colored by Seurat cell cluster for doxycycline-untreated vs. treated organoids.  
 (B and C) Hierarchical clustered heatmap depicting genes whose expression patterns covary across pseudotime (Z scores normalized by row) at branchpoints 1 and 2, respectively, for doxycycline-stimulated organoids.  
 (D) Pseudotime trajectory analysis of selected NPC-derived neuronal (NEU) (cluster 3 and 10), astrocyte (ASTRO) (cluster 4 and 6), and OL (cluster 16), showing the high degree of their maturation, and cycling cells (CYCLING) (cluster 7), colored by pseudotime, for doxycycline-untreated vs. treated organoids.  
 (E) Immunostaining of SOX10<sup>+</sup> and MBP<sup>+</sup> cells in cryosections at 2, 5, 8, and 16 weeks of differentiation in doxycycline-exposed SOX10-eGFP organoids (scale bar: 30 μm).  
 (F) Circle plot representing cellular communication among the different clusters in organoids using CellChat. Circle sizes are proportional to the number of cells in each cell group and edge width represents the communication probability.  
 (G) Heatmap showing detailed communication through individual pathways and providing insights into the autocrine- vs. paracrine-acting pathways for each cell type using CellChat.

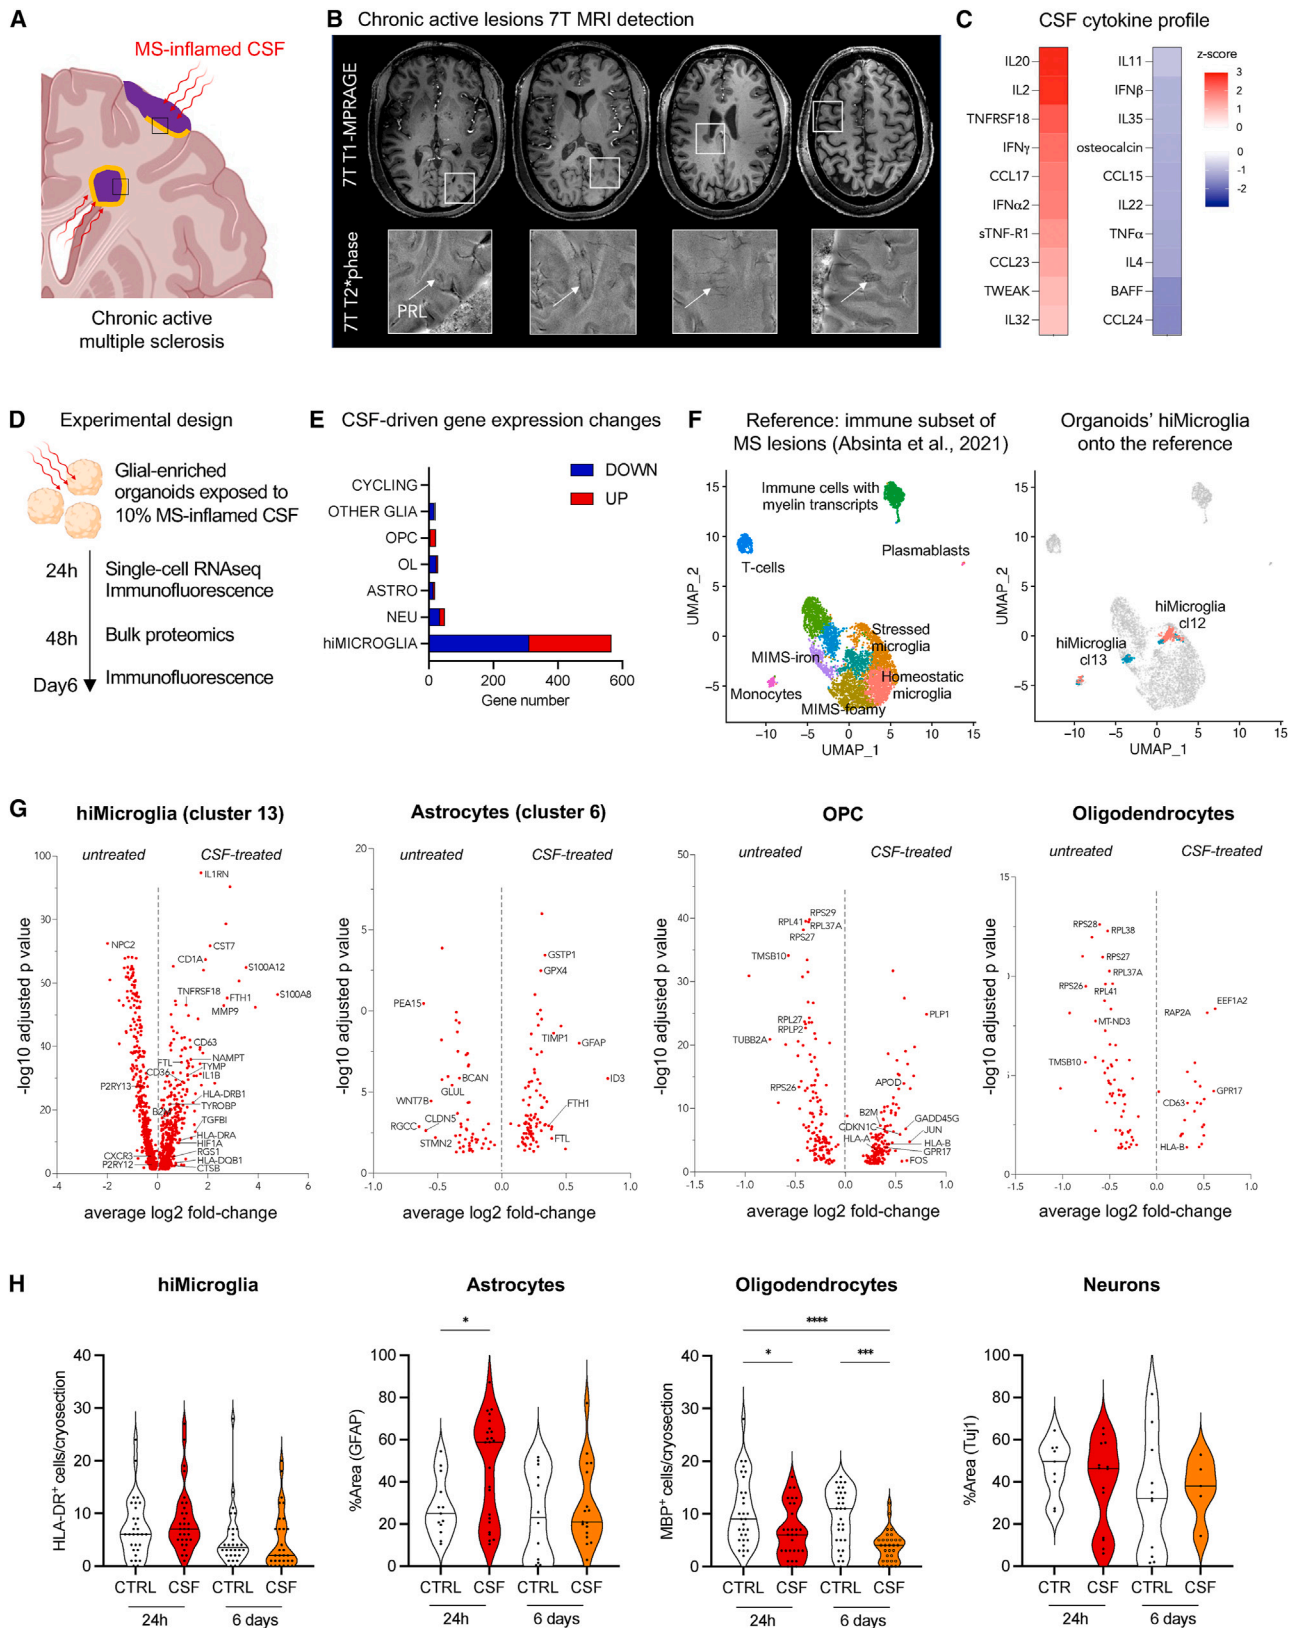

(legend on next page)

pattern recognition method implemented in the “IdentifyCommunicationPatterns” function of the CellChat package. We defined 6 pattern modules for outgoing signaling and 4 signaling pattern modules for incoming communication (Figure S4). The choice of the number of modules is based on the suggestion provided by the silhouette plot generated by the function selectK.

Outgoing signaling pattern #2 is associated with immune cells and features a high contribution score<sup>30</sup> of the MHC-II, SPP1, complement, TGF- $\beta$ , TNF- $\alpha$ , and IL-16 pathways (Figure S4). Outgoing signaling pattern #4 includes high contribution score of signaling pathways, such as THBS, AGRN, and ACTIVIN, which characterize the astrocyte clusters. Outgoing oligolineage signaling is represented by pattern #5, including pathways such as PDGF, CLDN, SEMA3, and MAG. Outgoing neuronal signaling is defined by different patterns (#1, #6) and feature pathways such as EPHB, EPHA, FGF, NECTIN, VISFATIN, WNT, NRG, EGF, SOMATOSTATIN, and PTPRM (Figure S4). We performed the same analysis for incoming signaling (Figure S4). The pattern analysis microglial cluster signaling is dominated by pattern #2, which features a high contribution score by pathways such as APP, MHC-II, complement, THY1, CD39, and TGF- $\beta$ , among others. Most incoming oligolineage cells are characterized by pattern #4, which is characterized by the COLLAGEN, PDGF, CLDN, VISTA, and MAG pathways (Figure S4).

By cross-referencing outgoing and incoming signaling patterns, we detailed communications through individual pathways, providing insights into the autocrine-acting vs. paracrine-acting pathways for each cell type (Figure 3G). In detail, major autocrine-acting pathways in immune cells are via the antigen-presenting MHC-II complex and the complement pathway (CD46), as well as GNR, GALECTIN, the adenosine-generating enzyme CD39 (regulating microglia ramification),<sup>31</sup> TGF- $\beta$ <sup>32</sup> (critical for adult microglia homeostasis), VCAM, PECAM1, TNF- $\alpha$ , and IL-16 signaling. Among the major paracrine-acting microglia-to-astrocyte pathways, network centrality analysis identified that microglia are the most prominent source of osteopontin (SPP1) acting not only in an autocrine fashion but also on astrocytes (Figure 3G). These findings are consistent with data indicating that SPP1 exhibits cytokine, chemokine, and signal transduction functions by interacting with integrins and CD44-variant receptors, such as those expressed in astrocytes. Moreover, astro-

cytes and microglia were inferred to communicate also via thrombospondins and CD46, a regulator of complement activation, and semaphorin 4D signaling, which controls microglia and astrocyte activation (Figure 3G).

### Organoids respond to the exposure of MS-inflamed CSF mimicking the CNS glial-microglia phenotypes in chronic active MS

We tested whether our cellular model was able to respond to complex inflammatory stimuli, i.e., the supernatant of inflamed cerebrospinal fluid (CSF) from subjects diagnosed with MS (Figure 4), and whether it could, in principle, be exploited to interrogate and decode *in vitro* the human glial-microglia axis in the context of a dysregulated inflammatory environment (simulated by the inflamed CSF).

To this end, the levels of 69 inflammatory mediators were evaluated in 75 CSF samples from untreated MS cases by Bio-Plex analysis (Table S5). From this pool, we randomly selected CSF from 3 MS cases and additional 3 CSF from non-neurological controls (Table S6). We exposed organoids from 4 different hiPSC lines to 10% CSF supernatant for 24 h; real-time qPCR was then performed to measure the expression of inflammatory markers (*NAMPT* and *CXCL8*) and glial lineage markers (*AIF1* and *GFAP*) selected based on prior evidence from our single-nucleus RNA sequencing (snRNA-seq) MS study.<sup>3</sup> We observed that CSF from controls did not modulate *NAMPT* and *CXCL8* mRNA expression, compared to untreated conditions, whereas treatment with MS CSF induced a significant increase in *NAMPT* and *CXCL8* mRNA expression (ANOVA  $p = 0.05$  and  $p = 0.03$ , respectively; Figure S5A). *AIF1* and *GFAP* mRNA were not significantly different across conditions (Figure S5A), suggesting that the obtained results were not biased by heterogeneous glial cell composition. The MS CSF-triggered inflammatory response has been also confirmed through bulk proteomic analysis conducted 48 h after CSF exposure, revealing differential expression of 105 proteins between conditions. Pathways analysis showed enrichment in the JAK-STAT-mediated cytokines and chemokines signaling pathway (STAT3, AKT1, AKT2, AKT3, GNB2, HRAS, GNB1, GNB2, GNB4, CSK, and CRKL), proteasome activation, and apoptotic processes (Figure S5B; Table S7).

### Figure 4. In response to inflamed CSF, organoids mimic macroglia-microglia phenotypes in chronic active MS

(A) Schematic of MS brain pathology with chronic active lesions (with their inflammatory edge in orange), cortical lesions, and MS-inflamed CSF. (B and C) Representative case with both *in vivo* 7T MRI and CSF inflammatory profile: 54-year-old woman with relapsing MS, untreated at the time of lumbar puncture. The MRI shows 4 chronic active MS lesions seen by their paramagnetic rims (arrows, magnified views) on susceptibility-based images (B). Heatmap showing the Z scores of CSF-cytokines concentration relative to the CSF of the other 74 untreated MS cases (C). (D) Schematic of the experimental design: exposure of organoids to 10% patient-derived CSF supernatant (devoid of lymphocytes and monocytes) and processing for scRNA-seq, immunostaining, and bulk proteomics at different time points. (E) Bar plot of counts of significant differentially expressed genes (average log<sub>2</sub> fold change > 0.5;  $p$  adjusted < 0.05, upregulated in red and downregulated in blue) between 24-h CSF-exposed vs. untreated organoids by cell cluster. (F) Reference atlas based on the re-analysis of immune subclustering of chronic active MS lesions in the study by Absinta et al.<sup>3</sup> (on the left) and mapping of organoids scRNA-seq data onto the MS immune subset reference (on the right). (G) Volcano plots report gene expression changes in untreated vs. 24-h CSF-stimulated SOX10-eGFP organoids for each glial cell population ( $p$  adjusted < 0.05). (H) Violin plots showing the quantification of main cell populations in CSF-treated (“CSF”) vs. untreated (“CTRL”) organoids at different time points (ANOVA test [Tukey’s multiple comparison test \* $p < 0.05$ , \*\* $p < 0.01$ , \*\*\* $p < 0.001$ , \*\*\*\* $p < 0.0001$ ]). Abbreviations are as follows: MS, multiple sclerosis; CSF, cerebrospinal fluid; NEU, neurons; ASTRO, astrocytes; OPC, oligodendrocyte precursor cells; OL, oligodendrocytes; hiMICROGLIA, hiPSC-derived microglia; OTHER GLIA, immature astrocytes; MIMS, microglia inflamed in MS; and AIMS, astrocytes inflamed in MS.

To more deeply interrogate the effect of MS-inflamed CSF at molecular and cellular levels, organoids ( $n = 30$  for each experiment, 3 hiPSC lines) were exposed for 24 h to 10% CSF supernatant and dissociated for scRNA-seq (Figure 4D). For this experiment, we selected the CSF of an untreated 54-year-old woman with relapsing-remitting MS with chronic active lesions on her 7T MRI scan (Figure 4B). Although this CSF was largely representative of the inflamed CSF of relapsing MS, we noticed Z scores  $> 1.5$  for proinflammatory cytokines and chemokines, such as IL-20, IL-2, TNFRSF8, interferon (IFN) $\gamma$ , TARC/CCL17, IFN $\alpha$ 2, sTNFR1, CCL23, and TWEAK, when compared to the CSF of the other 74 untreated cases, indicating Th1-driven response (Figure 4C; Table S5). We performed the cluster-wise differential gene expression analysis between CSF-exposed vs. nonexposed organoids. Differentially expressed genes (average log<sub>2</sub> fold change  $> 0.5$  and adjusted  $p < 0.01$ ) were implemented for enrichment analysis (enrichR package). As expected, CSF perturbation strongly affected the transcriptional profile of hiMicroglia (first responder), but also oligolineage cells and astrocytes (Figure 4E). On the other hand, the short exposure to CSF seems not to affect neurons, with only a subset (cluster 0) shown to be enriched for ferroptosis by the pathway analysis (MAP1LC3A) (Table S8).<sup>33</sup>

In detail, in CSF-exposed hiMicroglia, the pathway analysis was enriched for regulation of the inflammatory response (CCL22, CXCL8, CCL20, HIF1A, MMP14, SELENOS, RGS1, GPR183, IL1B, NAMPT, CD14, TIMP1, and IL7R), antigen processing and presentation (HLA-DMA, HLA-DRA, HLA-DQA1, and HLA-DRB1), cytokine-cytokine receptor interaction (IL1RN, CCL22, CXCL8, CCL20, IL1B, TNFRSF18, CCL4, CCL3, IL7R, IL2RG, and TNFRSF4), activation of the Toll-like receptor signaling pathway (CXCL8, IL1B, CCL4, CCL3, MAP3K8, and CD14) complement pathway (FCN1, FCER1G, HSPA5, MMP14, S100A12, ADAM9, TIMP1, CD36, CALM1, S100A9, and CTSB), reactive oxygen species production (SELENOS, NDUFB4, PRDX1, CAT, and GLRX), ferroptosis (FTH1, ACSL4, and FTL), and the IFN $\gamma$  response (NAMPT, FPR1, ITGB7, PTPN6, IFI30, HIF1A, HLA-DQA1, and HLA-DRB1) (Figure 4G; Table S8).

In oligolineage cells (both OLs and OPCs), we found a significant downregulation of ribosomal genes, suggesting modifications of the cellular translational machinery. Of note, ribosome stalling during protein synthesis may harbor proteotoxic components and trigger cellular stress conditions, as observed during neurodegeneration.<sup>34</sup> Moreover, upregulation of GPR17, a known negative regulator of myelination recently investigated in MS,<sup>35</sup> was observed (Figure 4G). Upregulation of the tetraspanin CD63 might indicate the release of extracellular vesicles by the OLs in response to an inflammatory insult. In OPC (cluster 2), treatment with CSF showed enrichment for genes implicated in TNF- $\alpha$  signaling via nuclear factor (NF- $\kappa$ B) (JUN, FOS, and IER2), as well as in hypoxia (CDKN1C, JUN, and FOS), IL-2/STAT5 (CDKN1C and ALCAM), and p53 (JUN and FOS) signaling pathways (Figure 4G; Table S8).

Next, to assess transcriptional similarity between the cell types in the CSF-exposed organoids and cells in the MS brain, we mapped our single-cell data onto the snRNA-seq dataset from autopsy MS brain tissue in the study by Absinta et al.,<sup>3</sup> which included chronic active MS lesions (Figure 4F). Notably,

the transcriptional profile of hiMicroglia partially overlapped with the signature of microglia inflamed in MS (MIMS)-iron of the chronic active lesion edge<sup>3</sup> (Figure 4F). Of interest, overlapping genes include the upregulation of iron-related genes (FTL and FTH1)—consistent with the iron retention within microglia observed by MRI at the chronic active lesion edge (PRL imaging biomarker, Figure 4B)—as well as immunoglobulin Fc-gamma receptors (FCGR7), MHC class II protein complex (HLA-DRA), SPP1, and the inflammatory cytokine IL1B.<sup>3</sup> We also observed downregulation of homeostatic microglial genes, such as CX3CR1 and P2RY12.

To quantify such similarity between MIMS-iron and CSF-perturbed hiMicroglia, we scored their transcriptomic profile by gene set enrichment analysis. Interestingly, we identified a significant enrichment score for both upregulated (cluster 12: normalized enrichment score [NES] = 1.69, adjusted  $p < 0.01$ ; leading edges: FTH1, CTSB, CD63, FCER1G, B2M, SPP1, ITGB2, APOE, HIF1A, GRN, TYROBP, CTSZ, TIMP2, and CD9; cluster 13: NES = 1.60, adjusted  $p < 0.04$ , leading edges: FTH1, FCER1G, ITGB2, CD63, HIF1A, CSTB, SPP1, TYROBP, CTSS, and CTSZ) and downregulated signatures (cluster 13: NES =  $-1.67$ , adjusted  $p < 0.03$ ; leading edges: CX3CR1, MEF2A, FCHSD2, P2RY12, and CYTH4) (Figure S5C), providing additional statistical evidence of transcriptional profile similarity.

A similar approach was implemented for the astrocytes, where we found that the transcriptional profile of inflamed astrocytes partially overlapped with the signature of designated “astrocytes inflamed in MS” (AIMS)<sup>3</sup> and reactive astrocytes at the chronic active lesion edge (Figures S5D and S5E). This indicates that the astrocytes in organoids can acquire disease-associated phenotypes providing a simplified model for their investigation.<sup>3</sup> Interestingly, in the comparison between controls- and MS-derived cells, the CSF challenge was differentially enriching the MS astrocytes and MS neurons in energy-related terms (i.e., mitochondrial electron transport, oxidative phosphorylation, and cellular response to hypoxia) (Table S9).

Similarly, organoids’ oligolineage cells co-map with subclusters of OPC and early myelinating OL seen in the MS tissue (Figures S5F and S5G).<sup>3</sup> As highlighted in recent human snRNA-seq MS studies,<sup>3,36</sup> we found some OL heterogeneity in our organoid model: 17.8% of them mapped on cluster 2 of Absinta et al.<sup>3</sup> (OPALIN<sup>+</sup> as described also in the study by Jäkel et al.<sup>36</sup>) and the remaining 82.2% on cluster 6 (BCAS1<sup>+</sup> suggesting they are newly myelinating OLs) of Absinta et al.<sup>3</sup>

### Cell-to-cell communication perturbation by MS-inflamed CSF

Using CellChat, we observed differences in the number of interactions (defined as the delta of the number of ligand-receptor pairs per connection) and interaction strength (defined as the delta of the sum of interaction weights of ligand-receptor pairs per connection) between CSF-treated and untreated organoids (Figure S6A). In the CSF-treated organoids, there were a higher number of interactions between hiMicroglia and astrocytes, while the interaction strength was greater between astrocytes and neurons (shown as red lines in Figure S6A). Some crosstalk, like the OPC-astrocytes interaction, displayed fewer interactions but higher interaction strength, suggesting a complex

remodeling of communication patterns. Upon detailed exploration of the upregulated ligand-receptor pairs in CSF-treated organoids (Figure S6B), we noted an upregulation in microglial MHC-II signaling and an increase in microglial-osteopontin (*SPP1*) interaction. *SPP1* interaction was not only limited to integrins (*ITGAV* and *ITGB1*) with both astrocytes and oligolineage cells but also involved *CD44* through an autocrine pattern (upregulation of both ligand and receptor in microglial cells exposed to the CSF). These findings support and expand upon our results from the differential expression analysis and align with observations from our snRNA-seq analysis of chronic active MS brains.<sup>3</sup> It is worth noting that exposure to inflamed CSF increased the overall signaling of neuronal and glial *NCAM1*, which plays a crucial role in CNS processes like cell adhesion, migration, synaptic plasticity, and the regulation of inflammatory signaling through NF- $\kappa$ B and mitogen-activated protein kinase pathways.<sup>37</sup>

### Short- and long-term effects of MS-inflamed CSF on the glial-enriched organoids

The effect of MS-inflamed CSF on the organoid cultures was examined after 24 h and 6 days using different experimental approaches to fully understand its temporal dynamics. Besides the early transcriptomic changes across various cell populations, we further investigated whether CSF exposure could lead to delayed OL and neuronal loss. By immunostaining, we observed a significant decrease (nearly 50%) in the number of MBP<sup>+</sup> OLs (ANOVA  $p < 0.0001$ ), but not in neuronal staining area 6 days following the inflamed MS-CSF exposure, suggesting specific vulnerability of OLs to the MS-CSF (Figure 4H). The count of HLADR<sup>+</sup> (antigen-presenting) microglial cells and astrogliosis (GFAP staining area) did not exhibit a significant difference between control and CSF-treated organoids at day 6, but only a transient increase of GFAP staining after 24 h ( $p = 0.004$ ; Figure 4H).

## DISCUSSION

In the present study, the obtained results serve two purposes. The first part of the study introduced a protocol for generating a 3D hiPSC-based organoid model, partially able to recapitulate the rich diversity of cell types in the *in vivo* human brain. This model offers some relevant advantages over existing methods, including the relatively rapid generation of mature CNS cell types, an enrichment of glial cells (including MBP<sup>+</sup> OLs), and the integration of hiPSC-derived microglia into organoids. By short ectopic *SOX10* expression, we were able to promote oligodendroglia commitment in a subset of NPCs, without disrupting the oligodendroglia endogenous differentiation program as well as the differentiation of other NPC-derived cells, such as neurons and astrocytes. In the second part of the study, the organoid model was applied in a specific translational context. Due to the absence of preclinical models for smoldering MS, we exposed the glial-enriched organoids to inflamed CSF supernatant from patients with MS. This approach aimed to model and to explore the spatial and temporal interactions between macroglia-microglia, which are considered crucial to the non-relapsing biology of progressive MS.

Differently from cortical brain organoids modeling the developing brain, our model might represent a simplified platform lacking cortical patterning but enriched by mature glial cell types. In previously published cortical brain organoid single-cell transcriptomic datasets,<sup>20–27</sup> only astrocytes showed the transcriptional profile of their corresponding cells in the adult cortex, and no cells with a transcriptional profile of adult OLs were detected. Of relevance, immunohistochemical analysis of the human fetal brain demonstrated early OL specification<sup>38–42</sup> and myelination beginning prenatally.<sup>43</sup> The overall lack of OLs in cortical organoids likely prevents a proper modeling of the developing brain in terms of the spatial and temporal progression of oligolineage, as well as of the regulatory signals for OL differentiation.<sup>44</sup> To date, only three other studies generated hiPSC-derived brain organoids containing OLs (termed human OL spheroids) by adding specific small molecules (platelet-derived growth factor-AA, insulin-like growth factor-1, and 3,3',5-triiodothyronine) known to foster OL induction and maturation.<sup>23,45,46</sup> However, compared to the protocols of Madhavan et al.<sup>22</sup> and Marton et al.,<sup>45</sup> which require 14–20 weeks of differentiation to obtain MBP<sup>+</sup> OLs, our protocol offers faster and more robust production of OLs (8 weeks of differentiation) by genetically inducing the commitment of a subset of NPCs to oligodendrogenesis. Moreover, the immune counterpart is missing in the aforementioned protocols. Interestingly, we observed the presence of BCAS1<sup>+</sup> OLs marking newly myelinating OLs, which have been described not only in the fetal and early postnatal human white matter but also in a proportion of chronic MS lesions with signs of remyelination.<sup>47</sup> Thus, mapping ongoing myelin formation, the presence of BCAS1<sup>+</sup> OLs offers the possibility to investigate potential cellular targets for remyelination therapies in MS.

In MS, growing evidence suggests that the biology behind disease progression independent of relapse activity (often termed PIRA or silent progression) involves compartmentalized CNS inflammation and neurodegeneration rather than peripheral lymphocyte attacks on the CNS.<sup>2</sup> In this context, it has been hypothesized that meningeal inflammation initiates a “surface-in” gradient of tissue injury implicating soluble CSF inflammatory molecules in triggering microglia and astrocyte priming as well as neurodegeneration.<sup>48–50</sup> To experimentally test this hypothesis and to recapitulate such pathological processes, including their temporal sequence, in this study, organoids were exposed to the inflamed CSF of patients with MS with chronic active lesions at different time points (from 24 h to 1 week).

Short-term MS-inflamed CSF perturbation strongly affected the transcriptional profile of hiMicroglia (acting as first responder), oligolineage cells, and astrocytes, but not neurons, indicating that CSF-induced inflammation may drive neurodegeneration by first triggering glial changes.<sup>33</sup> The transcriptional profile of hiMicroglia partially overlapped with the signature of MIMS-iron at the chronic active lesion edge.<sup>3</sup> In line with our experimental findings, a recent human pathological study highlighted the correlation between meningeal inflammation and higher proportion of chronic active lesions in the MS brain.<sup>51</sup> The possibility to mimic the activation of microglia genes modules implicated in antigen presentation, direct propagation of inflammatory responses, and oxidative damage in the context of a 3D human cellular environment is encouraging. However, no

upregulation of phagocytic activity, as seen in the MIMS-foamy of the chronic active MS lesions,<sup>3</sup> was observed in the CSF-exposed hiMicroglia, potentially supporting divergent pathways of activation. We also demonstrated that CSF-exposed astrocytes in organoids can acquire the astrocyte phenotype of both reactive and inflamed astrocytes (AIMS) seen at the chronic active lesion edge, thereby providing a simplified model for their investigation. In OPCs, CSF induced the upregulation of genes involved in self-antigen presentation, a process recently observed after OPC exposure to IFN $\gamma$  in both cell cultures and animal MS models.<sup>52,53</sup> Together with downregulation of the cellular translational machinery, such evidence supports the vulnerability of both OLs and OPCs in the MS inflammatory environment, as further demonstrated by nearly 50% reduction in OLs, but not neurons by day 6. Our temporally resolved organoid data support and expand on the role of soluble CSF mediators in sustaining a downstream cascade of events leading to OLs death and potentially neurodegeneration.

Notably, there was a distinct response observed in organoids derived from individuals with MS compared to those from the control group when exposed to the MS-inflamed CSF. By single-cell transcriptomics, an enrichment in terms associated with cellular energy (such as mitochondrial electron transport, oxidative phosphorylation, and cellular response to hypoxia) was observed in MS-derived organoids, particularly within MS neurons and MS astrocytes (Table S9). These findings align with the concept of higher energy demand of MS brains as well as with prior studies investigating intrinsic differences between hiPSC-derived cells from patients with MS and control subjects.<sup>16,17,54</sup> Furthermore, supporting this observation, the recent effort of the International Multiple Sclerosis Genetics Consortium underscored that genetic variants linked to disease susceptibility map on immune cells, whereas disease severity seems to be linked to CNS cells.<sup>55</sup> This suggests some potential genetic determination of the dysfunctional CNS response to inflammatory injury in MS.

In conclusion, our *in vitro* cellular platform provides an important early foundation with which to iteratively increase our understanding by testing hypotheses emerging from human association studies. The scalability of hiPSC-derived organoids also makes this system amenable to genetic and small-molecule screens to identify novel therapeutics and unveil the key regulators of human myelination and chronic inflammatory neurodegeneration.

### Limitations of the study

Our 3D model represents a simplified platform disentangling the complexity of the cellular landscape of the human brain, and it does not entirely recapitulate the vast amount of its cellular heterogeneity (i.e., vascular cells are completely lacking) as well as its complex cytoarchitecture. Moreover, although we provided a thorough characterization of our model, the experiments were limited to 5 different cell lines derived from 2 non-neurological controls and 3 MS cases; thus, the number of donors could be increased, especially to assess morphological and transcriptional differences between MS and controls. To overcome inter-organoid variability limitations, next steps might also include the generation of multi-donor organoids. Finally, since microglia

can survive in culture for only a few weeks once mature, further optimization of the protocols would be necessary to establish a more chronically inflamed organoid model.

### STAR★METHODS

Detailed methods are provided in the online version of this paper and include the following:

- KEY RESOURCES TABLE
- RESOURCE AVAILABILITY
  - Lead contact
  - Materials availability
  - Data and code availability
- EXPERIMENTAL MODEL AND SUBJECT DETAILS
  - Ethics statement
  - Human subjects
  - Human induced pluripotent stem cells derived NPCs
- METHOD DETAILS
  - Lentiviral vector construction
  - Enzymatic modification and DNA ligation
  - Bacterial transformation
  - Viral production and virus titration
  - Transfection and viral production
  - Infection of HEK293T cells and virus titration
  - NPC infection and sorting of GFP<sup>+</sup> cells
  - Production of multi-lineage organoids
  - Production of organoids using GIBCO protocol
  - hiMicroglia differentiation
  - Cryopreservation
  - Immunofluorescence on whole cryosections
  - Immunofluorescence on free floating organoids
  - Transmission electronic microscopy
  - Real-time quantitative PCR (qPCR)
  - Electrophysiology
  - CSF analysis and treatment
  - 7T MRI acquisition
  - Single-cell RNAseq
  - Bioinformatic analysis
  - Donor deconvolution
  - Cluster compositional analysis
  - Pseudotime trajectory analysis
  - Cell-to-cell communication
  - Reference-based mapping
  - Gene set enrichment analysis (GSEA)
  - Differential expression and pathways analysis in MS-derived vs. control-derived organoids
  - Label-free quantitative proteomic analysis
- QUANTIFICATION AND STATISTICAL ANALYSIS
  - Organoids' immunostaining quantification
  - Statistical analysis

### SUPPLEMENTAL INFORMATION

Supplemental information can be found online at <https://doi.org/10.1016/j.xcrm.2024.101680>.

### ACKNOWLEDGMENTS

This work has been supported by the Cariplo Foundation (2019-1677), the Fondazione Regionale per la Ricerca Biomedica Early Career Award (1750327), the Roche Foundation for Independent Research 2019, the Adelson Medical Research Foundation, the International Progressive MS Alliance (PA-1604-08492 BRAVEinMS), and the Intramural Program of the NINDS, NIH.

We thank the members of the Neuroimmunology Clinic (led by Irene Cortese), the Viral Immunology Section (led by Steven Jacobson), and the

Translational Neuroradiology Section (led by Daniel Reich) of NINDS, NIH for CSF collection and 7T MRI acquisition. At San Raffaele Scientific Institute (Milan), we thank Luigi Naldini's group (TIGET) for providing plasmids; Maira Girani for recruiting patients for skin biopsy; Annamaria Cafarella for generating the lentiviral vector; Alessandra Mandelli, Maria Sofia Martire, Svetlana Bezukladova, Carolina Peri, and Jessica Perego for helping with cell cultures and/or FACS; Giacomo Sferruzza, Giovanni Landoni, and Antonella Crescenti for CSF collection from non-neurological controls; Francesca Giannese and Caterina Oneto (COSR) for helping with the 10X Genomics experiments; Valeria Berno and the resources of the ALEMBIC facility for confocal imaging; and resources of the Research Cluster of San Raffaele Scientific Institute for computational analysis.

#### AUTHOR CONTRIBUTIONS

Conceptualization, M.A.; methodology, F.F., E.P., S.T., E. Brambilla, F.R., T.K., V.M., P.P., A.Q., A.A.P., C.B., L.S., D.S.R., and P.P.-B.; writing – original draft, F.F. and M.A.; intellectual contribution and manuscript editing, M.A., L.S., T.K., P.A.C., D.S.R., P.P.-B., and G.M.; funding acquisition and supervision, M.A.

#### DECLARATION OF INTERESTS

D.S.R.: research funding from Abata Therapeutics and Sanofi-Genzyme.

P.A.C.: research funding from Genentech and previously Principia; consulting honoraria for serving on SABs for NervGen, Idorsia, Biogen, Vaccitech, and Lilly.

L.S.: original organoid model<sup>6</sup> is under a patent by Johns Hopkins University, which is licensed to AxoSim, New Orleans, US; she consults for AxoSim.

M.A.: consultancy fees from GSK, Sanofi, Biogen, Immunic Therapeutics, and Abata Therapeutics.

Received: June 6, 2023

Revised: January 12, 2024

Accepted: July 16, 2024

Published: August 8, 2024

#### REFERENCES

- Reich, D.S., Lucchinetti, C.F., and Calabresi, P.A. (2018). Multiple Sclerosis. *N. Engl. J. Med.* *378*, 169–180. <https://doi.org/10.1056/NEJMr1401483>.
- Kuhlmann, T., Moccia, M., Coetzee, T., Cohen, J.A., Correale, J., Graves, J., Marrie, R.A., Montalban, X., Yong, V.W., Thompson, A.J., et al. (2023). Multiple sclerosis progression: time for a new mechanism-driven framework. *Lancet Neurol.* *22*, 78–88. [https://doi.org/10.1016/S1474-4422\(22\)00289-7](https://doi.org/10.1016/S1474-4422(22)00289-7).
- Absinta, M., Maric, D., Gharagozloo, M., Garton, T., Smith, M.D., Jin, J., Fitzgerald, K.C., Song, A., Liu, P., Lin, J.-P., et al. (2021). A lymphocyte-microglia-astrocyte axis in chronic active multiple sclerosis. *Nature* *597*, 709–714. <https://doi.org/10.1038/s41586-021-03892-7>.
- Paşca, S.P., Arlotto, P., Bateup, H.S., Camp, J.G., Cappello, S., Gage, F.H., Knoblich, J.A., Kriegstein, A.R., Lancaster, M.A., Ming, G.-L., et al. (2022). A nomenclature consensus for nervous system organoids and assembloids. *Nature* *609*, 907–910. <https://doi.org/10.1038/s41586-022-05219-6>.
- Absinta, M., Sati, P., Masuzzo, F., Nair, G., Sethi, V., Kolb, H., Ohayon, J., Wu, T., Cortese, I.C.M., and Reich, D.S. (2019). Association of Chronic Active Multiple Sclerosis Lesions With Disability In Vivo. *JAMA Neurol.* *76*, 1474–1483. <https://doi.org/10.1001/jamaneurol.2019.2399>.
- Pamies, D., Barreras, P., Block, K., Makri, G., Kumar, A., Wiersma, D., Smirnova, L., Zang, C., Bressler, J., Christian, K.M., et al. (2017). A human brain microphysiological system derived from induced pluripotent stem cells to study neurological diseases and toxicity. *ALTEX* *34*, 362–376. <https://doi.org/10.14573/altex.1609122>.
- Ehrlich, M., Mozafari, S., Glatza, M., Starost, L., Velychko, S., Hallmann, A.-L., Cui, Q.-L., Schambach, A., Kim, K.-P., Bachelin, C., et al. (2017). Rapid and efficient generation of oligodendrocytes from human induced pluripotent stem cells using transcription factors. *Proc. Natl. Acad. Sci. USA* *114*, E2243–E2252. <https://doi.org/10.1073/pnas.1614412114>.
- García-León, J.A., Kumar, M., Boon, R., Chau, D., One, J., Wolfs, E., Eggermont, K., Berckmans, P., Gunhanlar, N., de Vrij, F., et al. (2018). SOX10 Single Transcription Factor-Based Fast and Efficient Generation of Oligodendrocytes from Human Pluripotent Stem Cells. *Stem Cell Rep.* *10*, 655–672. <https://doi.org/10.1016/j.stemcr.2017.12.014>.
- Yu, Y., Chen, Y., Kim, B., Wang, H., Zhao, C., He, X., Liu, L., Liu, W., Wu, L.M.N., Mao, M., et al. (2013). Olig2 targets chromatin remodelers to enhancers to initiate oligodendrocyte differentiation. *Cell* *152*, 248–261. <https://doi.org/10.1016/j.cell.2012.12.006>.
- Zhang, K., Chen, S., Yang, Q., Guo, S., Chen, Q., Liu, Z., Li, L., Jiang, M., Li, H., Hu, J., et al. (2022). Author Correction: The Oligodendrocyte Transcription Factor 2 OLIG2 regulates transcriptional repression during myelination in rodents. *Nat. Commun.* *13*, 3164. <https://doi.org/10.1038/s41467-022-30945-w>.
- Schulz, C., Gomez Perdiguero, E., Chorro, L., Szabo-Rogers, H., Cagnard, N., Kierdorf, K., Prinz, M., Wu, B., Jacobsen, S.E.W., Pollard, J.W., et al. (2012). A lineage of myeloid cells independent of Myb and hematopoietic stem cells. *Science* *336*, 86–90. <https://doi.org/10.1126/science.1219179>.
- Abud, E.M., Ramirez, R.N., Martinez, E.S., Healy, L.M., Nguyen, C.H.H., Newman, S.A., Yeromin, A.V., Scarfone, V.M., Marsh, S.E., Fimbres, C., et al. (2017). iPSC-Derived Human Microglia-like Cells to Study Neurological Diseases. *Neuron* *94*, 278–293.e9. <https://doi.org/10.1016/j.neuron.2017.03.042>.
- Bakken, T.E., Jorstad, N.L., Hu, Q., Lake, B.B., Tian, W., Kalmbach, B.E., Crow, M., Hodge, R.D., Krienen, F.M., Sorensen, S.A., et al. (2021). Comparative cellular analysis of motor cortex in human, marmoset and mouse. *Nature* *598*, 111–119. <https://doi.org/10.1038/s41586-021-03465-8>.
- Tanaka, Y., Cakir, B., Xiang, Y., Sullivan, G.J., and Park, I.-H. (2020). Synthetic Analyses of Single-Cell Transcriptomes from Multiple Brain Organoids and Fetal Brain. *Cell Rep.* *30*, 1682–1689.e3. <https://doi.org/10.1016/j.celrep.2020.01.038>.
- Perriot, S., Mathias, A., Perriard, G., Canales, M., Jonkmans, N., Merienne, N., Meunier, C., El Kassab, L., Perrier, A.L., Laplaud, D.-A., et al. (2018). Human Induced Pluripotent Stem Cell-Derived Astrocytes Are Differentially Activated by Multiple Sclerosis-Associated Cytokines. *Stem Cell Rep.* *11*, 1199–1210. <https://doi.org/10.1016/j.stemcr.2018.09.015>.
- Clayton, B.L.L., Barbar, L., Sapor, M., Rusielewicz, T., Kalpana, K., Migliori, B., NYSCF Global Stem Cell Array® Team; Paull, D., Brenner, K., Moroziewicz, D., et al. (2023). Patient iPSC models reveal glia-intrinsic phenotypes in multiple sclerosis. Preprint at bioRxiv. <https://doi.org/10.1101/2023.08.01.551553>.
- Ghirotto, B., Oliveira, D.F., Cipelli, M., Basso, P.J., de Lima, J., Breda, C.N.S., Ribeiro, H.C., Silva, C.C.C., Sertié, A.L., Oliveira, A.E.R., et al. (2022). MS-Driven Metabolic Alterations Are Recapitulated in iPSC-Derived Astrocytes. *Ann. Neurol.* *91*, 652–669. <https://doi.org/10.1002/ana.26336>.
- Hao, Y., Hao, S., Andersen-Nissen, E., Mauck, W.M., 3rd, Zheng, S., Butler, A., Lee, M.J., Wilk, A.J., Darby, C., Zager, M., et al. (2021). Integrated analysis of multimodal single-cell data. *Cell* *184*, 3573–3587.e29. <https://doi.org/10.1016/j.cell.2021.04.048>.
- Cao, J., O'Day, D.R., Pliner, H.A., Kingsley, P.D., Deng, M., Daza, R.M., Zager, M.A., Aldinger, K.A., Blecher-Gonen, R., Zhang, F., et al. (2020). A human cell atlas of fetal gene expression. *Science* *370*, eaba7721. <https://doi.org/10.1126/science.aba7721>.
- Birey, F., Andersen, J., Makinson, C.D., Islam, S., Wei, W., Huber, N., Fan, H.C., Metzler, K.R.C., Panagiotakos, G., Thom, N., et al. (2017). Assembly of functionally integrated human forebrain spheroids. *Nature* *545*, 54–59. <https://doi.org/10.1038/nature22330>.

21. Fiddes, I.T., Lodewijk, G.A., Mooring, M., Bosworth, C.M., Ewing, A.D., Mantalas, G.L., Novak, A.M., van den Bout, A., Bishara, A., Rosenkrantz, J.L., et al. (2018). Human-Specific NOTCH2NL Genes Affect Notch Signaling and Cortical Neurogenesis. *Cell* 173, 1356–1369.e22. <https://doi.org/10.1016/j.cell.2018.03.051>.
22. Giandomenico, S.L., Mierau, S.B., Gibbons, G.M., Wenger, L.M.D., Masullo, L., Sit, T., Sutcliffe, M., Boulanger, J., Tripodi, M., Derivery, E., et al. (2019). Cerebral organoids at the air-liquid interface generate diverse nerve tracts with functional output. *Nat. Neurosci.* 22, 669–679. <https://doi.org/10.1038/s41593-019-0350-2>.
23. Madhavan, M., Nevin, Z.S., Shick, H.E., Garrison, E., Clarkson-Paredes, C., Karl, M., Clayton, B.L.L., Factor, D.C., Allan, K.C., Barbar, L., et al. (2018). Induction of myelinating oligodendrocytes in human cortical spheroids. *Nat. Methods* 15, 700–706. <https://doi.org/10.1038/s41592-018-0081-4>.
24. Quadrato, G., Nguyen, T., Macosko, E.Z., Sherwood, J.L., Min Yang, S., Berger, D.R., Maria, N., Scholvin, J., Goldman, M., Kinney, J.P., et al. (2017). Cell diversity and network dynamics in photosensitive human brain organoids. *Nature* 545, 48–53. <https://doi.org/10.1038/nature22047>.
25. Trujillo, C.A., Gao, R., Negraes, P.D., Gu, J., Buchanan, J., Preissl, S., Wang, A., Wu, W., Haddad, G.G., Chaim, I.A., et al. (2019). Complex Oscillatory Waves Emerging from Cortical Organoids Model Early Human Brain Network Development. *Cell Stem Cell* 25, 558–569.e7. <https://doi.org/10.1016/j.stem.2019.08.002>.
26. Velasco, S., Kedaigle, A.J., Simmons, S.K., Nash, A., Rocha, M., Quadrato, G., Paulsen, B., Nguyen, L., Adiconis, X., Regev, A., et al. (2019). Individual brain organoids reproducibly form cell diversity of the human cerebral cortex. *Nature* 570, 523–527. <https://doi.org/10.1038/s41586-019-1289-x>.
27. Xiang, Y., Tanaka, Y., Patterson, B., Kang, Y.-J., Govindaiah, G., Roselaar, N., Cakir, B., Kim, K.-Y., Lombroso, A.P., Hwang, S.-M., et al. (2017). Fusion of Regionally Specified hPSC-Derived Organoids Models Human Brain Development and Interneuron Migration. *Cell Stem Cell* 21, 383–398.e7. <https://doi.org/10.1016/j.stem.2017.07.007>.
28. Eichmüller, O.L., and Knoblich, J.A. (2022). Human cerebral organoids - a new tool for clinical neurology research. *Nat. Rev. Neurol.* 18, 661–680. <https://doi.org/10.1038/s41582-022-00723-9>.
29. Trapnell, C., Cacchiarelli, D., Grimsby, J., Pokharel, P., Li, S., Morse, M., Lennon, N.J., Livak, K.J., Mikkelsen, T.S., and Rinn, J.L. (2014). The dynamics and regulators of cell fate decisions are revealed by pseudotemporal ordering of single cells. *Nat. Biotechnol.* 32, 381–386. <https://doi.org/10.1038/nbt.2859>.
30. Jin, S., Guerrero-Juarez, C.F., Zhang, L., Chang, I., Ramos, R., Kuan, C.-H., Myung, P., Plikus, M.V., and Nie, Q. (2021). Inference and analysis of cell-cell communication using CellChat. *Nat. Commun.* 12, 1088. <https://doi.org/10.1038/s41467-021-21246-9>.
31. Matyash, M., Zabiegajlov, O., Wendt, S., Matyash, V., and Kettenmann, H. (2017). The adenosine generating enzymes CD39/CD73 control microglial processes ramification in the mouse brain. *PLoS One* 12, e0175012. <https://doi.org/10.1371/journal.pone.0175012>.
32. Spittau, B., Dokalis, N., and Prinz, M. (2020). The Role of TGFβ Signaling in Microglia Maturation and Activation. *Trends Immunol.* 41, 836–848. <https://doi.org/10.1016/j.it.2020.07.003>.
33. van Olst, L., Rodriguez-Mogeda, C., Picon, C., Kiljan, S., James, R.E., Kammernans, A., van der Pol, S.M.A., Knoop, L., Michailidou, I., Drost, E., et al. (2021). Meningeal inflammation in multiple sclerosis induces phenotypic changes in cortical microglia that differentially associate with neurodegeneration. *Acta Neuropathol.* 141, 881–899. <https://doi.org/10.1007/s00401-021-02293-4>.
34. Yip, M.C.J., and Shao, S. (2021). Detecting and Rescuing Stalled Ribosomes. *Trends Biochem. Sci.* 46, 731–743. <https://doi.org/10.1016/j.tibs.2021.03.008>.
35. Chen, Y., Wu, H., Wang, S., Koito, H., Li, J., Ye, F., Hoang, J., Escobar, S.S., Gow, A., Arnett, H.A., et al. (2009). The oligodendrocyte-specific G protein-coupled receptor GPR17 is a cell-intrinsic timer of myelination. *Nat. Neurosci.* 12, 1398–1406. <https://doi.org/10.1038/nn.2410>.
36. Jäkel, S., Agirre, E., Mendanha Falcão, A., van Bruggen, D., Lee, K.W., Knuesel, I., Malhotra, D., Ffrench-Constant, C., Williams, A., and Castelo-Branco, G. (2019). Altered human oligodendrocyte heterogeneity in multiple sclerosis. *Nature* 566, 543–547. <https://doi.org/10.1038/s41586-019-0903-2>.
37. Eve, M., Gandawijaya, J., Yang, L., and Oguro-Ando, A. (2022). Neuronal Cell Adhesion Molecules May Mediate Neuroinflammation in Autism Spectrum Disorder. *Front. psychiatry* 13, 842755. <https://doi.org/10.3389/fpsy.2022.842755>.
38. Filipovic, R., Jakovcevski, I., and Zecevic, N. (2003). GRO-alpha and CXCR2 in the human fetal brain and multiple sclerosis lesions. *Dev. Neurosci.* 25, 279–290. <https://doi.org/10.1159/000072275>.
39. Jakovcevski, I., and Zecevic, N. (2005). Olig transcription factors are expressed in oligodendrocyte and neuronal cells in human fetal CNS. *J. Neurosci.* 25, 10064–10073. <https://doi.org/10.1523/JNEUROSCI.2324-05.2005>.
40. Jakovcevski, I., and Zecevic, N. (2005). Sequence of oligodendrocyte development in the human fetal telencephalon. *Glia* 49, 480–491. <https://doi.org/10.1002/glia.20134>.
41. Rakic, S., and Zecevic, N. (2003). Emerging complexity of layer I in human cerebral cortex. *Cerebr. Cortex* 13, 1072–1083. <https://doi.org/10.1093/cercor/13.10.1072>.
42. Rakic, S., and Zecevic, N. (2003). Early oligodendrocyte progenitor cells in the human fetal telencephalon. *Glia* 41, 117–127. <https://doi.org/10.1002/glia.10140>.
43. Jakovcevski, I., Mo, Z., and Zecevic, N. (2007). Down-regulation of the axonal polysialic acid-neural cell adhesion molecule expression coincides with the onset of myelination in the human fetal forebrain. *Neuroscience* 149, 328–337. <https://doi.org/10.1016/j.neuroscience.2007.07.044>.
44. Jakovcevski, I., Filipovic, R., Mo, Z., Rakic, S., and Zecevic, N. (2009). Oligodendrocyte development and the onset of myelination in the human fetal brain. *Front. Neuroanat.* 3, 5. <https://doi.org/10.3389/neuro.05.005.2009>.
45. Marton, R.M., Miura, Y., Sloan, S.A., Li, Q., Revah, O., Levy, R.J., Huguenard, J.R., and Paşca, S.P. (2019). Differentiation and maturation of oligodendrocytes in human three-dimensional neural cultures. *Nat. Neurosci.* 22, 484–491. <https://doi.org/10.1038/s41593-018-0316-9>.
46. Romero, J.C., Berlinicke, C., Chow, S., Duan, Y., Wang, Y., Chamling, X., and Smirnova, L. (2022). Oligodendrogenesis and myelination tracing in a CRISPR/Cas9-engineered brain microphysiological system. *Front. Cell. Neurosci.* 16, 1094291. <https://doi.org/10.3389/fncel.2022.1094291>.
47. Fard, M.K., van der Meer, F., Sánchez, P., Cantuti-Castelvetri, L., Mandad, S., Jäkel, S., Fornasiero, E.F., Schmitt, S., Ehrlich, M., Starost, L., et al. (2017). BCAS1 expression defines a population of early myelinating oligodendrocytes in multiple sclerosis lesions. *Sci. Transl. Med.* 9, eaam7816. <https://doi.org/10.1126/scitranslmed.aam7816>.
48. Magliozzi, R., Howell, O.W., Reeves, C., Roncaroli, F., Nicholas, R., Serafini, B., Aloisi, F., and Reynolds, R. (2010). A Gradient of neuronal loss and meningeal inflammation in multiple sclerosis. *Ann. Neurol.* 68, 477–493. <https://doi.org/10.1002/ana.22230>.
49. Magliozzi, R., Fadda, G., Brown, R.A., Bar-Or, A., Howell, O.W., Hametner, S., Marastoni, D., Poli, A., Nicholas, R., Calabrese, M., et al. (2022). “Ependymal-in” Gradient of Thalamic Damage in Progressive Multiple Sclerosis. *Ann. Neurol.* 92, 670–685. <https://doi.org/10.1002/ana.26448>.
50. Pardini, M., Brown, J.W.L., Magliozzi, R., Reynolds, R., and Chard, D.T. (2021). Surface-in pathology in multiple sclerosis: a new view on pathogenesis? *Brain* 144, 1646–1654. <https://doi.org/10.1093/brain/awab025>.
51. Ahmed, S.M., Fransen, N.L., Touil, H., Michailidou, I., Huitinga, I., Gommerman, J.L., Bar-Or, A., and Ramaglia, V. (2022). Accumulation of meningeal lymphocytes correlates with white matter lesion activity in



- progressive multiple sclerosis. *JCI insight* 7, e151683. <https://doi.org/10.1172/jci.insight.151683>.
52. Kirby, L., Jin, J., Cardona, J.G., Smith, M.D., Martin, K.A., Wang, J., Strassburger, H., Herbst, L., Alexis, M., Karnell, J., et al. (2019). Oligodendrocyte precursor cells present antigen and are cytotoxic targets in inflammatory demyelination. *Nat. Commun.* 10, 3887. <https://doi.org/10.1038/s41467-019-11638-3>.
  53. Falcão, A.M., van Bruggen, D., Marques, S., Meijer, M., Jäkel, S., Agirre, E., Samudiyata, N., Floriddia, E.M., Vanichkina, D.P., Ffrench-Constant, C., and Williams, A. (2018). Disease-specific oligodendrocyte lineage cells arise in multiple sclerosis. *Nat. Med.* 24, 1837–1844. <https://doi.org/10.1038/s41591-018-0236-y>.
  54. Starost, L., Lindner, M., Herold, M., Xu, Y.K.T., Drexler, H.C.A., Heß, K., Ehrlich, M., Ottoboni, L., Ruffini, F., Stehling, M., et al. (2020). Extrinsic immune cell-derived, but not intrinsic oligodendroglial factors contribute to oligodendroglial differentiation block in multiple sclerosis. *Acta Neuropathol.* 140, 715–736. <https://doi.org/10.1007/s00401-020-02217-8>.
  55. International Multiple Sclerosis Genetics Consortium; MultipleMS Consortium (2023). Locus for severity implicates CNS resilience in progression of multiple sclerosis. *Nature* 619, 323–331. <https://doi.org/10.1038/s41586-023-06250-x>.
  56. Reinhardt, P., Glatz, M., Hemmer, K., Tsytsyura, Y., Thiel, C.S., Höing, S., Moritz, S., Parga, J.A., Wagner, L., Bruder, J.M., et al. (2013). Derivation and expansion using only small molecules of human neural progenitors for neurodegenerative disease modeling. *PLoS One* 8, e59252. <https://doi.org/10.1371/journal.pone.0059252>.
  57. Follenzi, A., Ailles, L.E., Bakovic, S., Geuna, M., and Naldini, L. (2000). Gene transfer by lentiviral vectors is limited by nuclear translocation and rescued by HIV-1 pol sequences. *Nat. Genet.* 25, 217–222. <https://doi.org/10.1038/76095>.
  58. Modafferi, S., Zhong, X., Kleensang, A., Murata, Y., Fagiani, F., Pamies, D., Hogberg, H.T., Calabrese, V., Lachman, H., Hartung, T., and Smirnova, L. (2021). Gene-Environment Interactions in Developmental Neurotoxicity: a Case Study of Synergy between Chlorpyrifos and CHD8 Knockout in Human BrainSpheres. *Environ. Health Perspect.* 129, 77001. <https://doi.org/10.1289/EHP8580>.
  59. Huang, X., and Huang, Y. (2021). Cellsnp-lite: an efficient tool for genotyping single cells. *Bioinformatics* 37, 4569–4571. <https://doi.org/10.1093/bioinformatics/btab358>.
  60. Huang, Y., McCarthy, D.J., and Stegle, O. (2019). Vireo: Bayesian demultiplexing of pooled single-cell RNA-seq data without genotype reference. *Genome Biol.* 20, 273. <https://doi.org/10.1186/s13059-019-1865-2>.
  61. Subramanian, A., Tamayo, P., Mootha, V.K., Mukherjee, S., Ebert, B.L., Gillette, M.A., Paulovich, A., Pomeroy, S.L., Golub, T.R., Lander, E.S., and Mesirov, J.P. (2005). Gene set enrichment analysis: a knowledge-based approach for interpreting genome-wide expression profiles. *Proc. Natl. Acad. Sci. USA* 102, 15545–15550. <https://doi.org/10.1073/pnas.0506580102>.
  62. Love, M.I., Huber, W., and Anders, S. (2014). Moderated estimation of fold change and dispersion for RNA-seq data with DESeq2. *Genome Biol.* 15, 550. <https://doi.org/10.1186/s13059-014-0550-8>.
  63. Kuleshov, M.V., Jones, M.R., Rouillard, A.D., Fernandez, N.F., Duan, Q., Wang, Z., Koplev, S., Jenkins, S.L., Jagodnik, K.M., Lachmann, A., et al. (2016). Enrichr: a comprehensive gene set enrichment analysis web server 2016 update. *Nucleic Acids Res.* 44, W90–W97. <https://doi.org/10.1093/nar/gkw377>.
  64. Wiśniewski, J.R., Zougman, A., Nagaraj, N., and Mann, M. (2009). Universal sample preparation method for proteome analysis. *Nat. Methods* 6, 359–362. <https://doi.org/10.1038/nmeth.1322>.
  65. Cox, J., Neuhauser, N., Michalski, A., Scheltema, R.A., Olsen, J.V., and Mann, M. (2011). Andromeda: a peptide search engine integrated into the MaxQuant environment. *J. Proteome Res.* 10, 1794–1805. <https://doi.org/10.1021/pr101065j>.
  66. Fonseca, P., Pathan, M., Chitti, S.V., Kang, T., and Mathivanan, S. (2021). FunRich enables enrichment analysis of OMICs datasets. *J. Mol. Biol.* 433, 166747. <https://doi.org/10.1016/j.jmb.2020.166747>.
  67. Huang, D.W., Sherman, B.T., and Lempicki, R.A. (2009). Systematic and integrative analysis of large gene lists using DAVID bioinformatics resources. *Nat. Protoc.* 4, 44–57. <https://doi.org/10.1038/nprot.2008.211>.
  68. Korotkevich, G., Sukhov, V., and Sergushichev, A. (2019). Fast gene set enrichment analysis. Preprint at bioRxiv, 060012. <https://doi.org/10.1101/060012>.

STAR★METHODS

KEY RESOURCES TABLE

| REAGENT or RESOURCE                                  | SOURCE                   | IDENTIFIER                      |
|------------------------------------------------------|--------------------------|---------------------------------|
| <b>Antibodies</b>                                    |                          |                                 |
| Rabbit anti-GFP                                      | Life Technologies        | Cat# A11122; RRID:AB_221569     |
| Mouse anti-Nestin                                    | Millipore                | Cat# MAB5326 RRID:AB_2251134    |
| Rabbit Anti-Pax6                                     | Biologend                | Cat# 901301 RRID:AB_25655003    |
| Mouse anti-Tuj1                                      | Biologend                | Cat# 801202 RRID:AB_10063408    |
| Mouse anti-MAP2                                      | Millipore                | Cat# MAB3418 RRID:AB_11212326   |
| Rabbit anti-GFAP53                                   | Agilent Dako             | Cat# Z0334 RRID:AB_10013382     |
| Rabbit anti-S100B                                    | Agilent Dako             | Cat# Z0311 RRID:AB_10013383     |
| Rat anti-MBP                                         | Millipore                | Cat# MAB386; RRID:AB_94975      |
| Mouse anti-BCAS1                                     | Santa Cruz               | Cat# sc-136342 RRID:AB_10839529 |
| Rabbit anti-PDGFR $\alpha$                           | Cell Signaling           | Cat# 5241 RRID:AB_10692773      |
| Mouse anti-Human CD45                                | Agilent Dako             | Cat# M0701 RRID:AB_2314143      |
| Rat anti-CD11b                                       | Biorad                   | Cat# MCA74GA RRID:AB_324660     |
| Rabbit anti-IBA1                                     | Wako                     | Cat# 019-19741 RRID:AB_839504   |
| Rabbit anti-TMEM119                                  | Sigma                    | Cat# HPA051870 RRID:AB_2681645  |
| Alexa Fluor donkey anti-rabbit 488                   | Thermo Fisher Scientific | Cat# A32790 RRID:AB_2762833     |
| Alexa Fluor goat anti-mouse 546                      | Thermo Fisher Scientific | Cat# A21133 RRID:AB_2535772     |
| Alexa Fluor goat anti-rat 663                        | Thermo Fisher Scientific | Cat# A21094 RRID:AB_2535749     |
| Alexa Fluor goat anti-rat 546                        | Thermo Fisher Scientific | Cat# A11081 RRID:AB_2534125     |
| Alexa Fluor goat anti-rabbit 546                     | Thermo Fisher Scientific | Cat# A11010 RRID:AB_2534077     |
| <b>Bacterial and virus strains</b>                   |                          |                                 |
| Chemically competent <i>E. coli</i> (One Shot TOP10) | Invitrogen               | Cat# C404010                    |
| <b>Biological samples</b>                            |                          |                                 |
| Fibroblast cultures from cohort                      | This study               | <a href="#">Table S1</a>        |
| iPSC cultures from cohort                            | This study               | <a href="#">Table S1</a>        |
| CSF                                                  | This study               | <a href="#">Table S6</a>        |
| <b>Chemicals, peptides, and recombinant proteins</b> |                          |                                 |
| B-27 supplement lacking vitamin A                    | Gibco                    | Cat# 12587-010                  |
| N2 supplement                                        | Gibco                    | Cat# 17502-048                  |
| Matrigel (Matrigel Growth-factor-reduced)            | Corning                  | Cat# 354263                     |
| hESC-qualified matrix (MaES)                         | BD Biosciences           | Cat# 354277                     |
| ROCK inhibitor (Y-27632)                             | Calbiochem               | Cat# 688000                     |
| Collagenase type IV                                  | Gibco                    | Cat# 17104-019                  |
| Dorsomorphin                                         | StemMACS                 | Cat# 130-104-466                |
| CHIR 99021 trihydrochloride                          | Tocris                   | Cat# 4953                       |
| SB-431542                                            | StemMACS                 | Cat# 130-105-336                |
| Purmorphamine                                        | ENZO                     | Cat# ALZ-420-045-M001           |
| Neurobasal medium                                    | Gibco                    | Cat# 21103-049                  |
| DMEM-F12 medium                                      | Gibco                    | Cat# 21331-020                  |
| mTeSR basal medium                                   | STEMCELL                 | Cat# 05851                      |
| Penicillin/streptomycin/glutamine                    | Gibco                    | Cat# 15140-122                  |
| Ascorbic acid                                        | Sigma Aldrich            | Cat# A4403                      |
| Accumax                                              | Sigma Aldrich            | Cat# A7089                      |
| Smoothened Agonist (SAG)                             | Millipore                | Cat# 566660                     |

(Continued on next page)

**Continued**

| REAGENT or RESOURCE               | SOURCE                      | IDENTIFIER       |
|-----------------------------------|-----------------------------|------------------|
| BSA Molecular Biology Grade       | New England Biolabs         | Cat# B2000S      |
| XbaI restriction enzyme           | New England Biolabs         | Cat# #R0145      |
| NheI restriction enzyme           | New England Biolabs         | Cat# R3131       |
| MluI restriction enzyme           | New England Biolabs         | Cat# R3198       |
| SpeI restriction enzyme           | New England Biolabs         | Cat# R3133       |
| T4 DNA Polymerase                 | Promega                     | Cat# M4211       |
| Antarctic Phosphatase             | New England Biolabs         | Cat# M0289S      |
| T4 DNA-ligase                     | New England Biolabs         | Cat# M0202S      |
| SOC medium                        | Invitrogen                  | Cat# 15544034    |
| Ampicillin                        | Roche                       | Cat# 10835269001 |
| Triiodo-L-thyronine (T3)          | Sigma Aldrich               | Cat# T6397       |
| Recombinant human PDGF            | Preprotech                  | Cat# 100-13A     |
| Recombinant human NT3             | Preprotech                  | Cat# 450-03      |
| Recombinant human GDNF            | Sino Biological Inc         | Cat# 10561-HNCH  |
| Recombinant human IGF-1           | Preprotech                  | Cat# 100-11      |
| Recombinant human BDNF            | Sino Biological Inc         | Cat# 50240-MANS  |
| dcAMP analog                      | Sigma Aldrich               | Cat# D0627       |
| Doxycycline hydrochloride         | Sigma Aldrich               | Cat# D3447       |
| Triton X-100 reagent              | Sigma Aldrich               | Cat# 93420       |
| DAPI fluorescence reagent for DNA | Thermo Fisher Scientific    | Cat# D1306       |
| RapiClear™ 1.47                   | SUNJin Lab                  | Cat# RC147001    |
| Dako fluorescent mounting medium  | Agilent                     | Cat# S3023       |
| Epon resin                        | Electron Microscopy Science | Cat# 50-980-342  |
| Papain                            | STEMCELL                    | Cat# 074ss66     |
| DNAase I for cell culture         | STEMCELL                    | Cat# 07900       |
| EcoRI                             | New England Biolabs         | Cat# R3101       |
| AflIII restriction enzyme         | New England Biolabs         | Cat# R0541S      |
| NotI restriction enzyme           | New England Biolabs         | Cat# R0189S      |
| EcoRV restriction enzyme          | New England Biolabs         | Cat# R0195S      |
| Iscove's modified Dulbecco medium | Sigma Aldrich               | Cat# I3390       |
| Fetal Bovine Serum                | Euroclone                   | Cat# ECS0180L    |
| Ovomucoid protease inhibitor      | Worthington Biochemical     | Cat#LK003182     |

**Critical commercial assays**

|                                              |                          |                |
|----------------------------------------------|--------------------------|----------------|
| Sendai virus kit Cytotune                    | Invitrogen               | Cat# A16517    |
| Plasmid DNA Extraction mini kit              |                          | Cat# DE-034    |
| Xtra Maxi EF                                 | Macherey-Nagel           | Cat# 740424.50 |
| STEMdiff™ Hematopoietic Kit                  | STEMCELL                 | Cat# 05310     |
| STEMdiff™ Microglia Differentiation Kit      | STEMCELL                 | Cat# 100-0019  |
| STEMdiff™ Microglia Maturation Kit           | STEMCELL                 | Cat# 100-0020  |
| RNeasy Mini kit                              | Qiagen                   | Cat# 74106     |
| Thermo Script RT-PCR                         | Invitrogen               | Cat# 11146-024 |
| SuperScript IV First-Strand Synthesis System | Thermo Fisher Scientific | Cat# 18091050  |

**Deposited data**

|                                        |                                    |                |
|----------------------------------------|------------------------------------|----------------|
| scRNA-data of this study               | Deposited to GEO                   | GSE233295      |
| scRNA-seq for human adult cortex       | Hao et al., 2021. <sup>18</sup>    | GSE164378      |
| scRNA-seq for human fetal brain        | Cao et al., 2020. <sup>19</sup>    | GSE156793      |
| scRNA-seq for human cortical organoids | Birey et al., 2017. <sup>20</sup>  | SRA: SRP096997 |
| scRNA-seq for human cortical organoids | Fiddes et al., 2018. <sup>21</sup> | SRA: SRP121791 |

(Continued on next page)

**Continued**

| REAGENT or RESOURCE                                                                                                                                                                           | SOURCE                                                                                                                                                  | IDENTIFIER                      |
|-----------------------------------------------------------------------------------------------------------------------------------------------------------------------------------------------|---------------------------------------------------------------------------------------------------------------------------------------------------------|---------------------------------|
| scRNA-seq for human cortical organoids                                                                                                                                                        | Giandomenico et al., 2019. <sup>22</sup>                                                                                                                | SRA: SRP174405                  |
| scRNA-seq for human cortical organoids                                                                                                                                                        | Madhavan et al., 2018. <sup>23</sup>                                                                                                                    | SRA: SRP131980                  |
| scRNA-seq for human cortical organoids                                                                                                                                                        | Quadrato et al., 2017. <sup>24</sup>                                                                                                                    | SRA: SRP083140                  |
| scRNA-seq for human cortical organoids                                                                                                                                                        | Trujillo et al., 2019. <sup>25</sup>                                                                                                                    | SRA: SRP139859                  |
| scRNA-seq for human cortical organoids                                                                                                                                                        | Velasco et al., 2019. <sup>26</sup>                                                                                                                     | SRA: SRP191528                  |
| scRNA-seq for human cortical organoids                                                                                                                                                        | Xiang et al., 2017. <sup>27</sup>                                                                                                                       | SRA: SRP105219                  |
| scRNA-seq for human multiple sclerosis brain                                                                                                                                                  | Absinta et al., 2021. <sup>3</sup>                                                                                                                      | GSE180759                       |
| <b>Experimental models: Cell lines</b>                                                                                                                                                        |                                                                                                                                                         |                                 |
| Human Embryonic Kidney (HEK293T) cells                                                                                                                                                        | ATCC                                                                                                                                                    | Cat# CRL-1573 RRID:CVCL_0045    |
| <b>Oligonucleotides</b>                                                                                                                                                                       |                                                                                                                                                         |                                 |
| Probe LV (ATCTCTCTCCTCTAGCCTC)                                                                                                                                                                | This paper                                                                                                                                              | N/A                             |
| Primer FW (TACTGACGCTCTCGCACC)                                                                                                                                                                | This paper                                                                                                                                              | N/A                             |
| Primer REV (TCTCGACGCAGGACTCG)                                                                                                                                                                | This paper                                                                                                                                              | N/A                             |
| TaqMan Assay for <i>GAPDH</i> , <i>TUBB3</i> , <i>MBP</i> , <i>SOX10</i> , <i>S100B</i> , <i>MAP2</i> , <i>GFAP</i> , <i>OLIG2</i> , <i>CNP</i> , <i>CXCL8</i> , <i>AIF1</i> , <i>NAMPT</i> . | This paper                                                                                                                                              | Table S7                        |
| <b>Recombinant DNA</b>                                                                                                                                                                        |                                                                                                                                                         |                                 |
| pZ M2rtTA_CAGG_TetON-Sox10_GFP                                                                                                                                                                | Addgene                                                                                                                                                 | Cat# 115241 RRID:Addgene 115241 |
| #945.pCCL.sin.cPPT.SV40ployA.eGFP.minCMV.hPGK.deltaLNGFR.Wpre                                                                                                                                 | Kindly provided by Prof. Luigi Naldini                                                                                                                  | N/A                             |
| Plasmid coding for the non-correlated envelope of the vesicular stomatitis virus (VSV, protein-G)                                                                                             | Kindly provided by Prof. Luigi Naldini                                                                                                                  | N/A                             |
| Plasmid coding for the packaging proteins MDLg/pRRE                                                                                                                                           | Kindly provided by Prof. Luigi Naldini                                                                                                                  | N/A                             |
| Plasmid coding for REV protein                                                                                                                                                                | Kindly provided by Prof. Luigi Naldini                                                                                                                  | N/A                             |
| <b>Software and algorithms</b>                                                                                                                                                                |                                                                                                                                                         |                                 |
| GraphPad Prism                                                                                                                                                                                | <a href="https://Graphpad.com/">https://Graphpad.com/</a>                                                                                               | N/A                             |
| Fiji                                                                                                                                                                                          | <a href="https://ImageJ.net/software/fiji/downloads">https://ImageJ.net/software/fiji/downloads</a>                                                     | N/A                             |
| Monocle                                                                                                                                                                                       | <a href="https://www.bioconductor.org/packages/release/bioc/html/monocle.html">https://www.bioconductor.org/packages/release/bioc/html/monocle.html</a> | 2.18.0                          |
| CellChat                                                                                                                                                                                      | <a href="https://github.com/sqjin/CellChat">https://github.com/sqjin/CellChat</a>                                                                       | 1.5.0                           |
| Seurat                                                                                                                                                                                        | <a href="https://satijalab.org/seurat/">https://satijalab.org/seurat/</a>                                                                               | 4.3                             |
| R                                                                                                                                                                                             | <a href="https://www.r-project.org/">https://www.r-project.org/</a>                                                                                     | 4.2                             |

**RESOURCE AVAILABILITY**

**Lead contact**

Further information and requests for resources and reagents should be directed to and will be fulfilled by the lead contact, Martina Absinta ([absinta.martina@hsr.it](mailto:absinta.martina@hsr.it)).

**Materials availability**

All stable reagents generated in this study are available from the [lead contact](#) without restriction except for human induced pluripotent stem cell lines and their derivative for which permission must be requested and a material transfer agreement must be completed.

**Data and code availability**

- Single-cell RNA-seq data have been deposited at GEO (GSE233295). Microscopy data reported in this paper can be shared by the [lead contact](#) upon request.
- All original code has been posted in GitHub (<https://github.com/AbsintaLab/GLIA-ENRICHED-ORGANOIDS>).
- This paper analyzes existing, publicly available genomic datasets. These accession numbers for the datasets are listed in the [key resources table](#).
- Any additional information required to reanalyze the data reported in this paper is available from the [lead contact](#) upon request.

## EXPERIMENTAL MODEL AND SUBJECT DETAILS

### Ethics statement

The study was approved by the ethical committee of San Raffaele Hospital, Milan, Italy (45/INT/2021 and 137/2021).

### Human subjects

Permission to generate human induced pluripotent stem cells (hiPSC) from human fibroblasts was granted by the ethical committee of the San Raffaele Hospital (Milan, Italy) (BancaINSpe - INSPE1178). Fibroblasts were isolated from skin biopsies from 2 healthy volunteers (2 women) and 3 individuals with a diagnosis of relapsing-remitting MS (2 women, 1 man) (see [Table S1](#) for demographics). MRI acquisition and collection of CSF by lumbar puncture from 4 MS cases (2 women, 2 men) (see [Table S6](#) for demographics) were approved by the National Institute of Health (Bethesda, US) (protocol number: 89-N-0045; principal investigator: Daniel S. Reich, MD, PhD) and shared under a materials transfer agreement. CSF collection by lumbar puncture from 3 non-neurological controls (1 woman, 2 men) was granted by the ethical committee of the San Raffaele Hospital (Milan, Italy) (BancaINSpe - INSPE1178) (see [Table S6](#) for demographics). Written consent was obtained from all subjects.

### Human induced pluripotent stem cells derived NPCs

Fibroblasts were reprogrammed into iPSCs by using the replication-incompetent Sendai virus kit Cytotune (Invitrogen), according to manufacturer's instructions. To generate NPCs according to Reinhardt et al.,<sup>56</sup> colonies of iPSCs were detached from mouse embryonic fibroblasts by treatment with 1 mg/mL collagenase IV. After sedimentation, cells were resuspended in human embryonic stem cell (hESC) medium (DMEM-12, 20% KO serum replacement, 1:100 non-essential AA, 1:100 penicillin/streptomycin, 1:100 L-glutamine, 1:200 di  $\beta$ -mercaptoethanol), supplemented with 1  $\mu$ M dorsomorphin (Tocris), 3  $\mu$ M CHIR99021 (Tocris), 10  $\mu$ M SB-431542 (Ascent Scientific) and 0.5  $\mu$ M purmorphamine (Enzo). Embryoid bodies (EBs) were formed by culturing cells in non-tissue culture, extra low adhesion petri dishes. On day 2, medium was changed to N2B27 medium containing equal parts of neurobasal (GIBCO) and DMEM-F12 medium (Gibco) with 1:100 B27 supplement lacking vitamin A (GIBCO), 1:200 N2 supplement (GIBCO), 1% penicillin/streptomycin/glutamine (PSG) and the same small molecules mentioned before. On day 4, dorsomorphin and SB-431542 were withdrawn, while ascorbic acid (AA; 150  $\mu$ M) was added to the medium. On day 6, EBs were cut into smaller pieces and plated onto matrigel (Matrigel Growth-factor-reduced, Corning) coated 12-well plates. For passaging, NPCs were treated with Accumax. After 3 passages, purmorphamine was replaced by 1  $\mu$ M SAG (NPC medium).

## METHOD DETAILS

### Lentiviral vector construction

To stimulate the production of OLs in hiPSC-derived NPCs, we generated a lentiviral vector encoding the human SOX10 coding sequence and green fluorescent protein (GFP) as reporter gene under the control of doxycycline-inducible promoter ([Figure S1A](#)).

### Enzymatic modification and DNA ligation

To obtain suitable fragments for cloning, enzymatic restriction was performed digesting the plasmids with the appropriate restriction enzymes.

#945.pCCL.sin.cPPT.SV40ployA.eGFP.minCMV.hPGK.deltaLNGFR.Wpre plasmid (kindly provided by Prof. Luigi Naldini group, San Raffaele Telethon Institute for Gene Therapy, Milan) was digested with the XbaI and NheI restriction enzymes to obtain the vector, and the plasmid #115241 - pZ M2rtTA\_CAGG\_TetON-Sox10\_GFP (Addgene) was digested with MluI and SpeI restriction enzymes to obtain the insert. When needed, the DNA was filled in with Klenow (New England Biolabs) or T4 DNA Polymerase (New England Biolabs) to obtain blunt ends. The linearized vector plasmid was dephosphorylated by Antarctic Phosphatase (AnP) (New England Biolabs). The ligation between the insert and the linearized plasmid (vector) was performed with T4 DNA-ligase (New England Biolabs). Then, the ligation product was used to transform chemically competent bacteria.

### Bacterial transformation

Chemically competent bacteria (One Shot TOP10; Cat. No. C404010, Invitrogen) were used. Bacteria were stored at  $-80^{\circ}\text{C}$ , ready to use. The bacteria were thawed in ice and 10  $\mu$ L of ligation was added to each vial and incubated for 30 min on ice and, subsequently, heat-shocked at  $42^{\circ}\text{C}$  for 30 s and chilled on ice for 2 min. Then, 250  $\mu$ L of pre-warmed S.O.C. medium (Invitrogen) were added to the bacteria plus plasmidic DNA mix and shaken at  $37^{\circ}\text{C}$  for 1 h with vigorous shaking. At the end of the incubation, the bacteria were plated in an LB-Agar plate with an antibiotic resistance, i.e., 100 mg/mL ampicillin (Ampicillin, Roche). The plates were incubated at  $37^{\circ}\text{C}$  overnight. For colony selection and expansion of the cultures, several colonies were picked and inoculated in LB medium with 100  $\mu$ g/mL ampicillin at  $37^{\circ}\text{C}$  with shaking overnight. Then, the plasmid DNA from cultures was isolated using a Plasmid DNA Extraction mini kit (Fisher Molecular Biology, Cat. No. DE-034), according to the manufacturer's instructions.

To obtain a high quantity of DNA, a maxi-extraction of DNA was performed using a commercially available kit (Xtra Maxi EF, Macherey-Nagel; Cat. No. 740424.50), according to the manufacturer protocols.

### Viral production and virus titration

Human Embryonic Kidney (HEK293T) cells were used for both the viral production and virus titration. HEK293T were cultures at 37°C and in 5% CO<sub>2</sub>. The HEK293T cells were grown in Iscove's modified Dulbecco medium (IMDM, Sigma) supplemented with 10% of Fetal Bovine Serum (FBS, Cambrex), Ultra-glutamine (2 mM, GIBCO) and a combination of antibiotics (100 U/mL penicillin/streptomycin, GIBCO).

### Transfection and viral production

We used a third-generation *sin* lentiviral vector, produced by transient transfection into HEK293T cells, as previously described by Follenzi et al.<sup>57</sup> Approximately 24 h before the transfection 9 x 10<sup>6</sup> HEK293T cells/dish were plated in a final volume of 20 mL of complete IMDM and the medium was changed with fresh new medium 2 h before the transfection. The cells were transfected with the three packaging plasmids, the plasmid coding for the envelope protein VSVG, the plasmid coding for the packaging proteins MDLg/pRRE (which contains only the gag and pol coding sequences from HIV-1 and 374-bp RRE containing sequence from HIV-1 immediately downstream of the pol coding sequences), the plasmid coding for REV protein and the transfer vector #945\_hSox10 using CaCl<sub>2</sub> and HBS pH 7.14 solution. The conditioned medium was collected after further 30 h and filtered through 0.22 μm pore-size cellulose acetate filters (Millipore). The supernatant was centrifuged for 2 h at 20000 rpm at 20°C. The pellet was suspended with 70 μL of 1X Phosphate Saline Buffer (PBS). The pellet suspended was left for 30 min at room temperature (RT). Then, the virus was harvested and shaken for 30 min at 4°C to obtain a homogeneous solution. The viral solution was aliquoted and stored at -80°C.

### Infection of HEK293T cells and virus titration

Before viral titration, each virus was frozen and thawed once. Serial dilutions ranging from 1:10<sup>3</sup> to 1:10<sup>7</sup> of the virus were used to infect HEK293T cells. After 15 days *in vitro*, the HEK293T cells were harvested, then the DNA was extracted and analyzed by a real-time quantitative PCR (QuantStudio3, ThermoFischer), using the following primers: *GAPDH* #Hs00483111\_cn as housekeeping gene; for the sequence of LV we used Probe LV (5'-ATCTCTCTCCTTCTAGCCTC-3') and Primer FW (5'-TACTGACGCTCTCGCACC-3'), Primer REV (5'-TCTCGACGCAGGACTCG-3') (ThermoFisher). The viral titer was 2 x 10<sup>7</sup> Transducing Units (T.U.)/mL.

### NPC infection and sorting of GFP<sup>+</sup> cells

Then, hiPSC-derived NPCs were seeded at a confluence of 10 x 10<sup>6</sup> cells in T25 flask (day -1). At day 0 and 4, NPCs were infected with the SOX10-eGFP-expressing lentivirus (MOI = 0,06). At day 7, NPCs were stimulated with 1 μg/mL doxycycline for 24 h, and, then, infected cells with a stable infection constructs were selected by FACS-gating of GFP<sup>+</sup> cells, using a high-speed flow cytometry sorter (Beckman Coulter MoFlo Astrios EQ).

### Production of multi-lineage organoids

To generate self-organizing forebrain SOX10-eGFP organoids,<sup>4</sup> we leveraged a well-characterized approach.<sup>6,58</sup> NPCs were expanded in Matrigel-coated flasks in N2B27 medium containing equal parts of Neurobasal (Invitrogen) and DMEM-F12 medium (Invitrogen) with 1:100 B27 supplement lacking vitamin A (Invitrogen), 1:200 N2 supplement (Invitrogen), 1% penicillin/streptomycin/glutamine, supplemented with 3 μM CHIR, 1 μM SAG, 150 μM ascorbic acid. At 100% confluence, NPCs were enzymatically detached and counted. 2,5 x 10<sup>6</sup> cells per well were plated in 3 mL of Reinhardt complete medium in non-treated 6 well-plates. Cells were grown in Reinhardt complete medium for 24 h under constant gyratory shaking (88 rpm). Subsequently, medium was changed to glial induction medium (GIM) (100% DMEM-F12, 1:100 B27 lacking vitamin A, 1:200 N2, 1% Penicillin/Streptomycin, and 1% L-Glutaminase), supplemented with 10 ng/mL triiodo-L-thyronine (T3), 10 ng/mL rhPDGF, 10 ng/mL rhNT3, 1 μM SAG, 10 ng/mL μM IGF-1, 200 μM ascorbic acid, and 1 μg/mL doxycycline from day 1 to day 3. From day 5 till the end of the differentiation protocol, medium was replaced with glial differentiation medium (GDM) (100% DMEM-F12, 1:100 B27 lacking vitamin A, 1:200 N2, 1% Penicillin/Streptomycin, and 1% L-Glutaminase), supplemented with 60 ng/mL T3, 10 ng/mL rhNT3, 10 ng/mL IGF-1, 200 μM ascorbic acid, and 100 μM cyclic AMP analog (dbcAMP) to promote OPC proliferation and maturation. Doxycycline at the final concentration of 1 μg/mL was added to GDM medium from day 5 until day 14. On day 14, 0.01 μg/mL human recombinant GDNF and BDNF were added to the culture medium till the end of the differentiation protocol. Half of the medium was changed three times a week. Cultures were maintained at 37°C, 5% CO<sub>2</sub> under constant gyratory shaking (88 rpm) for up to 8 weeks.

### Production of organoids using GIBCO protocol

To generate self-aggregating GIBCO organoids, 2 x 10<sup>5</sup> hiPSCs were seeded as small colonies per well in a matrigel-coated 6-well plate in mTeSR Plus medium, supplemented with 10 μM Y-27632. The next day, medium was replaced with neural induction medium (Neurobasal medium and 1X neural induction supplement). After 7 days, NPC colonies were dissociated and expanded in the Neural Expansion medium (50% Neurobasal, 50% Advanced DMEM/F12 media, 1X Neural induction supplement, and 5 μM Y-27632). Cultures were kept at 37°C, with 5% CO<sub>2</sub> and 5% O<sub>2</sub>, with every second-day medium change. Organoids were generated as for Pamies et al., 2017.<sup>6</sup> Briefly, 2 x 10<sup>6</sup> NPCs per well were plated in uncoated 6-well plates. After 2 days, Neural Expansion medium was replaced with differentiation medium (B-27 Electrophysiology kit, 1% L-Glutaminase, 0.01 μg/mL human recombinant GDNF,

0.01  $\mu\text{g}/\text{mL}$  human recombinant BDNF, 1% Pen/Strep). Cultures were kept at 37°C, 5% CO<sub>2</sub>, and 20% O<sub>2</sub> under constant gyratory shaking (88 rpm, 19 mm orbit) for 8 weeks. Half of the medium was changed three times a week.

### hiMicroglia differentiation

Parallely, we differentiated hiPSC from donor 1 (Table S1) into microglia. hiPSC were first differentiated into hematopoietic progenitors' cells using STEMdiff Hematopoietic Kit (Catalog #05310), and, then, STEMdiff Microglia Differentiation Kit (Catalog #100-0019), and STEMdiff Microglia Maturation Kit (Catalog #100-0020) were used to generate mature microglia, according to the manufacturer's instructions.<sup>12</sup> FACS analysis was performed to check each maturation stage, according to the manufacturer's instructions.<sup>12</sup> At day 38 of differentiation, microglia was added to 8-week-old organoids (to have 10% microglia into the neuron-glia network, 200,000 cells/well of a 6-well-plate were plated). Organoids were harvested 24 or 48 h later for downstream analysis.

### Cryopreservation

Organoids were fixed in 4% paraformaldehyde (PFA) for 1 h at room temperature and, then, washed in 1X PBS (3 times) and transferred to 30% sucrose solution overnight. Subsequently, they were embedded in OCT and stored at -80°C. For immunofluorescence analysis, 15- $\mu\text{m}$ -thick sections were cut using a Leica cryostat.

### Immunofluorescence on whole cryosections

Cryosections were air dried for at least 40 min and, then, rinsed twice with 1X PBS for 5 min. Nonspecific binding sites were blocked by incubation in the blocking solution (1X PBS containing 0.1% Triton X-100 (Sigma-Aldrich, X-100), 10% serum) for 1 h at RT. Cryosections were incubated at 4°C for 24 h or 72 h with primary antibodies diluted in blocking solution in a humidity chamber. The following primary antibodies were used for immunofluorescence: anti-GFP (rabbit, 1:500, Life Technologies, A11122); anti-Nestin (mouse, 1:500, Millipore, MAB5326); anti-PAX6 (rabbit, 1:500, Biolegend, 901301); anti-GFAP53 (rabbit, 1:500, Agilent DAKO, Z0334); anti-S100 $\beta$  (rabbit, 1:300, DAKO, Z0311); anti-PDGFR $\alpha$  (rabbit, 1:100, Cell Signaling, 5241); anti-BCAS1 (mouse, 1:100, Santa cruz, sc-136342); anti-MBP (rat, 1:50, Millipore, MAB386); anti-Human CD45 (mouse, 1:500, Dako, M0855); anti-CD11b (rat, 1:100, Biorad, MCA74GA); anti-IBA1 (rabbit, 1:500, Wako 019-19741); anti-TMEM119 (rabbit, 1:500, Sigma, HPA051870. For double labeling, some primary antibodies were incubated simultaneously. After incubation with the primary antibodies, cryosections were washed three times for 5 min with 1X PBS containing 0.1% Triton X-100. Then, cryosections were incubated for 1 h at RT in the dark with appropriate fluorophore-conjugated secondary antibodies (Alexa Fluor 488, Alexa Fluor 546, and Alexa Fluor 633), diluted in 1X PBS containing 1% serum and 0.1% Triton X-100. In all immunofluorescence staining, nuclei were stained with DAPI (1:25,000; Roche) in 1X PBS for 2 min. Sections were mounted with Dako fluorescent mounting medium and imaged on Olympus FluoVIEW FV3000RS confocal microscope, or Maving RS-G4 Confocal. Images were processed in ImageJ (Fiji Version 2.0.0).

### Immunofluorescence on free floating organoids

Organoids were fixed in 4% PFA for 1 h at RT, and washed with 1X ice-cold PBS (3 times/10 min each) at RT. Then, fixed organoids were washed by rinsing with DPBS-Tween (0.1% Tween 20 in 1X DPBS) for 10 min at 60 rpm on the elliptical shaker at RT (3 times). For permeabilization and blocking, organoids were resuspended in blocking buffer (1% BSA and 2% Triton X-100 in 1X DPBS) and incubated for 4 h at RT on a rocker at 80 rpm. Then, organoids were incubated with selected primary antibody on a rocker at 80 rpm for 72 h at 4°C. The following primary antibodies were used for immunofluorescence: anti-GFP (rabbit, 1:500, Life Technologies, A11122); anti-Nestin (mouse, 1:200, Millipore, MAB5326); anti-Tuj1 (mouse, 1:1000, Biolegend, 801202). After primary antibody labeling, organoids were rinsed with wash buffer for 30 min on a rocker at 80 rpm (3 times). For secondary antibody labeling, organoids were incubated with secondary antibody at 4°C on a rocker at 80 rpm for 24 h, protected from light (see above). Then, organoids were rinsed with wash buffer and placed in a rocker at 80 rpm for 10 min (3 times). For nuclei staining, organoids were incubated with DAPI (1:10000; Roche) diluted in 1X cold PBS and incubated for 2 h on a shaker in dark and rinsed with buffer on a rocker at 80 rpm for 30 min (3 times). For organoids preparation for 3D Imaging, organoids were transferred into an Eppendorf tube and incubated in RapiClear per well for a 96-well plate (F-bottom, clear, black, CellStar, Cat.No #655090) for 24 h and, then, processed for confocal imaging.

### Transmission electronic microscopy

Organoids were incubated with Karnovsky's fixative (2% paraformaldehyde and 2.5% glutaraldehyde). Then, the organoids were washed in 0.1M cacodylate buffer. Post-fixed in 2% osmium, 1.5% potassium ferrocyanide for 1 h on ice, rinsed, dehydrated, and embedded in Epon resin (Electron Microscopy Science). Ultrathin sections were mounted onto slot grids for viewing using Talos 120C (Fei) microscope, images were acquired with a 4k x 4k Ceta CMOS camera (Thermo Fisher Scientific).

### Real-time quantitative PCR (qPCR)

qRT-PCR was performed in NPC and organoids using predeveloped TaqMan Assay Reagents on an ABI Prism 7500 Sequence Detection System (Applied Biosystems), according to manufacturer's protocol. RNA was extracted using the RNeasy Mini kit (Qiagen, 74106), according to the manufacturer's instructions. Then, RNA was eluted from columns using 20  $\mu\text{L}$  of RNase-free water, and their concentrations were determined spectro-photometrically by A260 (Nanodrop-ND1000). cDNA was synthesized from 100 to

500 ng of total RNA using the Thermo Script RT-PCR (Invitrogen, 11146-024). Approximately 25 ng of cDNA was used for RT-qPCR using predesigned TaqMan Gene Expression Assays (Applied Biosystems) on an ABI Prism 7500 Sequence Detection System (Applied Biosystems). GAPDH was used as housekeeping gene. Primers used are listed in Resource Table ([Table S10](#)).

### Electrophysiology

Organoids were plated in GDM on glass slides (pre-coated with 15  $\mu\text{g}/\text{mL}$  polyornithine in 1X PBS at 37°C, followed by incubation with 5  $\mu\text{g}/\text{mL}$  laminin in 1X PBS for at least 2 h at 37°C) for 2 days. Whole-cell patch clamp recordings were performed in cells from organoids cultured on glass slides (diameter: 1 cm) between week 8 and 12 of culture to verify the presence of neuronal electric activity. Individual slides were submerged in a recording chamber mounted on the stage of an upright BX51WI microscope (Olympus, Japan) and perfused with artificial cerebrospinal fluid (ACSF) containing (in mM): 125 NaCl, 3.5 KCl, 1.25  $\text{NaH}_2\text{PO}_4$ , 2  $\text{CaCl}_2$ , 25  $\text{NaHCO}_3$ , 1  $\text{MgCl}_2$ , and 11 D-glucose, saturated with 95%  $\text{O}_2$  5%  $\text{CO}_2$  (pH 7.3) at RT. Whole-cell current- and voltage-clamp recordings were performed using borosilicate pipettes filled with a solution containing the following (in mM): 30  $\text{KH}_2\text{PO}_4$ , 100 KCl, 2  $\text{MgCl}_2$ , 10 NaCl, 10 HEPES, 0.5 EGTA, 2  $\text{Na}_2\text{-ATP}$ , 0.02 Na-GTP, (pH 7.2 adjusted with KOH, tip resistance 4–6  $\text{M}\Omega$ ). Recordings were performed using a MultiClamp 700B amplifier interfaced with a PC through a Digidata 1440A (Molecular Devices, Sunnyvale, CA, USA). Traces were sampled at a frequency of 30 kHz and low-pass filtered at 2 kHz. Data were acquired using pClamp10 software (Molecular Devices) and analyzed with Prism 9 (GraphPad Software).

### CSF analysis and treatment

After centrifugation, the supernatant and the cell pellet were stored separately at  $-80^\circ\text{C}$  until use. Analysis of CSF levels of 69 inflammatory mediators was performed using 50  $\mu\text{L}$  of supernatant CSF and a combination of immune assay multiplex techniques, based on the Luminex technology (Kit 40-Plex Human Chemokine AND Kit 37-Plex Human Inflammation Panel 1, Bio-Plex X200 System equipped with a magnetic workstation; BioRad, Hercules, CA), using Bio-Plex Software Manager 6.1. All samples were analyzed in duplicate in 2 independent experiments to verify the results' reproducibility and consistency. The CSF level of each protein detected during the analysis was normalized to the total protein concentration of each CSF sample (measured by the Bradford protocol). For organoids exposure to CSF, SOX10-eGFP organoids stimulated with doxycycline and integrating hiPSC-derived microglia were exposed to 10% CSF for 24 h. For RT-qPCR,  $\sim 150$  organoids from 4 different cell lines were exposed to: (1) 10% CSF from 3 healthy controls and (2) 10% CSF from 3 MS patients ([Table S6](#)) for 24 h.

### 7T MRI acquisition

The *in vivo* MRI scan was obtained on a Siemens Magnetom 7T MRI scanner equipped with a birdcage-type transmit coil and a 32-channel receive coil with the following MRI sequences: (1) 2D high-resolution gradient echo sequence providing  $T_2^*$ -weighted and phase contrasts (TR = 1,300 ms; TE = 32 ms; 29 axial slices; FA =  $50^\circ$ ; AT = 8 min 36 s; in-plane resolution = 0.2 mm, slice thickness = 1  $\text{mm}^3$ ; voxel volume = 0.04  $\mu\text{L}$ ); 3 minimally overlapping slabs acquired to cover most of the supratentorial brain, and (2) whole-brain 3D  $T_1$ -weighted magnetization-prepared rapid gradient echo ( $T_1$ -MPRAGE) (TR = 2,200 ms; TE = 2.96 ms; TI = 1,050 ms; 256 slices; FA =  $7^\circ$ ; AT = 6 min 35 s; nominal resolution = 0.7 mm isometric, voxel volume = 0.34  $\mu\text{L}$ ) before and at least 5 min after injection of 0.1 mmol/kg gadobutrol.

### Single-cell RNAseq

Details of the experiments are listed in [Table S2](#). For the enzymatic cellular dissociation, 30 organoids, for each experiment, were first washed in Hank's balanced salt solution (HBSS) and, then, incubated with a freshly prepared dissociation solution (HBSS, papain and DNAase I) for 45 min at 37°C on an orbital shaker (90 rpm), and gently triturated using a P1000 pipette. Cells were incubated again for 15 min at 37°C on an orbital shaker (90 rpm) centrifuged and gently triturated using a P1000 pipette. After the single cell dissociation, the cell suspension was mixed (1:1) with 10 mg/mL ovomucoid protease inhibitor solution and centrifuged at 300g for 5 min. The pellet was resuspended in 1X PBS containing BSA (1:50). Cells were counted using trypan blue and a haemocytometer under bright field. A yield of 700–1,200 cells per  $\mu\text{L}$  per sample was targeted. For droplet-based scRNA-seq, libraries were prepared using the Chromium Single Cell 3' v3, according to the manufacturer's protocol (10x Genomics) without modifications, targeting 5,000 cells per sample. Using the Illumina Novaseq platform, all samples were sequenced at 50,000 reads per cells. Preparation of cDNA libraries and sequencing support were performed at the Center for Omics Sciences (San Raffaele Scientific Hospital, Milan).

### Bioinformatic analysis

Downstream analysis utilized the computational resources of the research cluster of San Raffaele Scientific Hospital, Milan. Cell Ranger software (v.6.1.2; 10x Genomics) was implemented for library demultiplexing, barcode processing, fastq file generation, gene alignment to the human genome (refdata-gex-GRCh38-2020-A), and unique molecular identifier (UMI) counts. Filtered matrices were loaded in Seurat (v 4.1.1) using the Read10X function with a cut-off value of 200 unique molecular identifiers (UMIs) and min.cells parameter of 20. The filters for mitochondrial reads and for min and max total number of features was tailored for specific runs. As initial reference, the entire dataset was projected onto two-dimensional space using UMAP on the top 30 principal components. After data normalization and scaling doublets and multiplets were filtered out using DoubletFinder. After preprocessing performed on individual samples, the object was integrated using Seurat workflow (IntegrateData function). The dataset was then scaled to remove



unwanted sources of variation (percent of mitochondrial reads, total counts per cells and cell-cycle score). On scaled data, linear dimension reduction (principal component analysis (PCA)) was performed, and the top 30 principal components were implemented for the unsupervised clustering. Seurat applies a graph-based approach to clustering: the FindNeighbors function implements the first 30 principal components to construct the k-nearest neighbors graph based on the Euclidean distance in PCA space, and the FindClusters function applies the Louvain algorithm to iteratively group nuclei (resolution = 0.8). The assignment of cell type identity to clusters was based on known cell lineage markers, as well as comparison with previously published and reported snRNA-seq studies. For each cluster, we extracted the average gene expression for all identified genes as well as the top 100 differentially expressed genes comparing each cluster against all the others. A differentially expressed gene was defined as a gene significantly expressed ( $p$  adjusted for multiple comparison,  $p < 0.05$ ) in  $\geq 25\%$  of cell populations and showing, on average,  $>0.25$ -fold difference (log scale) between groups of cells.

### Donor deconvolution

The termed “no-doxo pooled sample” (experiment #1, Table S2) included SOX10-transfected organoids not stimulated by doxycycline from 3 distinct donors (10 organoids for each donor). To separate the contribution of the 3 donors, a donor deconvolution was performed on the single-cell RNAseq data. After sequencing, the data have been processed using Cell Ranger (v.6.1.2, 10x Genomics). The resulting bam file has been implemented as input of cellsnp-lite using Mode1a.<sup>59</sup> cellsnp-lite is designed to pileup the expressed alleles in single-cell RNA-seq data, which can be directly used for donor deconvolution in multiplexed designs. After pileup, Vireo was used to demultiplex the donors by clustering the cells based on their single-nucleotide polymorphism (SNPs) profiles.<sup>60</sup>

### Cluster compositional analysis

To this end, two different algorithms were performed: MiloR and Cacoa.

(1) MiloR: we performed compositional analysis on the organoids single cell transcriptomic datasets using a tool for differential abundance testing on k-nearest neighbor (KNN) graph neighborhoods, implemented in the R package miloR <https://github.com/MarioniLab/miloR>. In brief, we performed PCA dimensionality reduction and KNN graph embedding on the dataset. We defined a neighborhood as the group of cells connected to a sampled cell by an edge in the KNN graph. Cells were sampled for neighborhood construction and tested for differences in abundance between the cells from doxycycline-stimulated vs. not organoids. Data are reported as density plot of the neighbors.

(2) Cacoa: we performed compositional analysis on the organoids single cell transcriptomic datasets, using a tool for differential abundance testing on isometric log-ratio transformation (ilr), implemented in the R package Cacoa <https://github.com/kharchenkolab/cacoa>. The 17 clusters were transformed into 17-1 simplex space using isometric log-ratio transformation (ilr). As ilr transformation uses normalization by geometric mean of abundances, the resulting 16 variables were mainly independent and, thus, suitable for statistical comparisons. To compare the cluster composition in the comparison, we identified a surface within this 16-simplex space that optimally separated the two conditions and estimated the extent to which different cell types drive the orientation of that surface measured and loading coefficients. To estimate the statistical significance of loading coefficients, we generated an empirical background distribution based on random resampling of samples and cells across the entire dataset.

### Pseudotime trajectory analysis

We used Monocle to generate the pseudotime trajectory analysis using the single-cell RNAseq dataset from organoids derived from donor 3 (without hiMicroglia incorporation). This approach allows to focus only on NPC-derived cells' differentiation trajectory. UMAP embeddings and cell subclusters generated from Seurat were converted to a CellDataSet object using SeuratWrappers and then used as input to perform trajectory graph learning and pseudotime measurement through independent component analysis (ICA) with Monocle. Heatmap of the gene expression at the branch points was produced using the function plot\_genes\_branched\_heatmap.

### Cell-to-cell communication

To infer cell-cell communication, we used the single-cell RNAseq dataset from GIBCO and SOX10-eGFP expressing organoids (both stimulated and nonstimulated with doxycycline) incorporating hiMicroglia. Cell-cell interactions based on the expression of known ligand-receptor pairs in different cell types were inferred using CellChat (v.1.5.0).<sup>30</sup> In brief, following the official workflow, we loaded the normalized counts into CellChat and applied the preprocessing functions ‘identifyOverExpressedGenes’, ‘identifyOverExpressedInteractions’ and ‘projectData’ with standard parameters set. As database we selected the ‘Secreted Signaling’ pathways and used the pre-compiled human ‘Protein-Protein-Interactions’ as a priori network information. For the main analyses the core functions ‘computeCommunProb’, ‘computeCommunProbPathway’ and ‘aggregateNet’ were applied using standard parameters and fixed randomization seeds. Finally, to determine the senders and receivers in the network the function ‘netAnalysis\_signalingRole’ was applied on the ‘netP’ data slot.

### Reference-based mapping

To assess the transcriptional similarity between the cell types in the organoids and the CNS cells of the adult human brain, we mapped the organoids' single cell transcriptomic data onto a reference atlas of the adult human primary motor cortex from

non-neurological subjects<sup>13,18</sup> using the Azimuth algorithm (<https://satijalab.org/azimuth/>). For each cell, a mapping score (reflecting the confidence associated with a specific annotation) and a prediction score (reflecting how well represented the cell is by the reference atlas) was generated. The mapping and the prediction scores provided by Azimuth range from 0 (no match) to 1 (perfect match). The same approach was implemented also to verify the transcriptional similarity between the cell types from 8 published single-cell RNAseq datasets<sup>20–27</sup> from cortical organoids (metanalysis available in Tanaka et al.,<sup>14</sup>) and the Azimuth adult human primary cortex.

A third label-transfer analysis was performed using a published snRNAseq dataset from MS brain tissue<sup>3</sup> to assess the transcriptional similarity between the immune cells and the astrocytes of the organoids vs. the immune and astrocyte subclustering of the adult MS human brain. To convert the MS dataset into a reference atlas, for each subcluster of interest, the Seurat pipeline was computed by adding the “model” argument to the UMAP function.

### Gene set enrichment analysis (GSEA)

We retrieved the list of differentially expressed genes of both microglia inflamed in MS (MIMS)-iron vs. homeostatic microglia as well as MIMS-foamy vs. homeostatic microglia ( $p$  adjusted  $<0.05$ ,  $\log_2$  fold change  $>0.5$ ) from a previously published snRNAseq dataset of chronic active MS brain lesions.<sup>3</sup> From the two ranked lists, we generated two signatures for the two MIMS subsets, after removing genes coding for ribosomal proteins. These signatures were then used to run Gene Set Enrichment Analysis (GSEA)<sup>61</sup> on the full ranks (CSF-exposed vs. control) for the organoids immune clusters 12 and 13.

### Differential expression and pathways analysis in MS-derived vs. control-derived organoids

For each cell type, using scRNAseq pseudobulk data, we performed a differential expression analysis using Deseq2.<sup>62</sup> The differentially expressed genes (defined by  $p$  value adjusted to multiple comparison  $<0.05$  and  $\text{abs } \log_2$  fold change  $>1$ ) were used as input for the enrichment analysis using enrichR package (with Reactome and GO:BP annotations).<sup>63</sup> Significant enriched terms (defined by  $p$  value adjusted to multiple comparison  $<0.05$  and odd ratio  $>5$ ) were analyzed for each cell type.

### Label-free quantitative proteomic analysis

Patient-derived organoids were lysed using M-PER Mammalian Protein Extraction Reagent (Thermo Scientific), added with protease (Thermo Fisher Scientific) and phosphatase inhibitor cocktails (PhoStop, Merck). In details, M-PER Mammalian Protein Extraction Reagent was added to a pellet of PDOs in a volume ratio 10:1. The lysates were mechanically disrupted by means of a syringe with a 25 Gauge needle. The samples were shaken at 400 rpm at 4°C for 10 min and then centrifuged at 14,000 rpm for 15 min at 4°C. The pellets were discarded, and the supernatants were subjected to BCA analysis in order to quantify the total protein content, using BSA as standard. Forty  $\mu\text{g}$  of total proteins from each sample were digested using the FASP (Filter Aided Sample Preparation) protocol.<sup>64</sup> Briefly, proteins were diluted to 200  $\mu\text{L}$  with 0.1 M Tris/HCl pH 7.4. Cysteines were reduced with 50  $\mu\text{L}$  of 0.1 M DTE (1,4-dithioerythritol) in Tris/HCl pH 7.4 and incubated at 95°C for 1 min; then samples were centrifuged on Amicon Ultra-3K at 14,000  $\times g$  for 10 min with a solution of urea 8 M. Cysteines were alkylated with 100  $\mu\text{L}$  0.05 M IAA (iodoacetamide) in urea 8 M added on the filter and laid at room temperature for 5 min; samples were centrifuged on Amicon Ultra-3K at 14,000  $\times g$  for 10 min with a solution of urea 8 M and then incubated overnight at 37°C in the presence of trypsin 1:50 (w/w), upon dilution of urea up to 2 M with 50 mM ammonium bicarbonate buffer.

Peptide mixtures were desalted on home-made Stage Tips C18 and injected in a capillary chromatographic system (EASY-nLC 1000 Integrated Ultra High Pressure Nano-HPLC System, Proxeon Biosystem) for peptide separations on a 75  $\mu\text{m}$  i.d.  $\times$  15 cm reverse phase silica capillary column, packed with 1.9  $\mu\text{m}$  ReproSil-Pur 120 C18-AQ (Dr. Maisch GmbH, Germany). A 100 min-gradient of eluents A (pure water with 0.1% v/v formic acid) and B (acetonitrile with 0.1% v/v formic acid) was used to achieve separation (from 5% to 40% of B in 88 min, 300 nL/min flow rate). Mass Spectrometry analyses were performed using a Q-Exactive mass spectrometer (Thermo Scientific, Bremen, Germany) equipped with a nano-electrospray ion source (Proxeon Biosystems). Each sample was analyzed in technical triplicates. Full scan spectra were acquired with the lock-mass option, resolution set to 70,000 and mass range from  $m/z$  300 to 2000. The ten most intense ions (charge exclusion: unassigned, 1, 6–8,  $>8$ ) were selected to be fragmented (ddMS2). Tandem mass spectrometry spectra were acquired with resolution set to 17,500, NCE set to 25 with an isolation window of 2  $m/z$ . All tandem mass spectrometry data were analyzed using Mascot (version 2.6, Matrix Science) search engine to search the human\_proteome 20220525 (101,676 sequences; 41,413,969 residues). Searches were performed with the following settings: trypsin as proteolytic enzyme; 2 missed cleavages allowed; carbamidomethylation on cysteine as fixed modification; protein N-terminus-acetylation, methionine oxidation as variable modifications; mass tolerance was set to 5 ppm and to 0.02 Da for precursor and fragment ions, respectively.

All data were then analyzed by MaxQuant software (v. 1.6.1.0)<sup>65</sup> for label-free protein quantification based on the precursor intensity, using the above search parameters, except for  $\pm 20$  ppm for fragment ions mass tolerance. FDR of 1% was selected for both peptide and protein identification, with minimum two peptides per protein with at least one unique. The complete dataset of identified and quantified proteins was subjected to Student's  $t$  test in order to define significantly differently expressed proteins, with a  $p$  value  $<0.05$ . The statistical analysis and the subsequent hierarchical clustering were performed using an in-house developed R script. GO analyses were performed using the free-downloadable software FunRich<sup>66</sup> and tissue distribution analysis was performed using David software.<sup>67</sup> For enrichment analysis, we conducted GSEA using the ranks of the detected proteins. The statistical metric utilized for protein ranking was the  $t$ -statistics derived from comparing CSF-treated versus untreated organoid samples. Annotations

from KEGG (REACTOME, GO:BP) were implemented to score and the enrichment calculations were performed using the fgsea package.<sup>68</sup>

## QUANTIFICATION AND STATISTICAL ANALYSIS

### Organoids' immunostaining quantification

After immunolabeling, the number of cells (branched MBP<sup>+</sup> OLs and HLADR<sup>+</sup> microglia) was determined by counting stained cells in at least 30 organoid cryosections per experimental conditions. Counting was independently performed by two raters at the fluorescence microscope (disagreements were resolved by consensus). For the quantification of the percentage staining area (GFAP, Tuj1, Nestin, Pax6), images were analyzed with ImageJ (Fiji Version 2.0.0) in at least 10 organoid cryosections per experimental condition.

### Statistical analysis

A detailed description of the statistical analysis is provided in each corresponding figure legend. Numeric data (mean, SD, SEM, and N) were included either in the figures or in supplemental tables corresponding to the graphs. Statistical analysis used one-way analysis of variance with corresponding post-hoc tests for multiple group comparisons. For rt-qPCR analysis, gene expression values were averaged, mean-centered, and z-score-scaled and analyzed using a mixed-effects model (interaction between treatment and time). See dedicated paragraph for the details of the snRNA-seq bioinformatic analysis; top 100 differentially expressed genes in [Table S3](#) were defined as genes significantly expressed ( $p$  adjusted for multiple comparisons  $<0.05$ ) in  $\geq 25\%$  of cell populations, and showing, on average,  $>0.25$ -fold difference (log<sub>2</sub> scale) between groups of cells. Analyses were performed using R 4.1.1 and Prism software (GraphPad software, San Diego, CA, USA; version 9.2.0). In all reported statistical analyses, effects were designated as significant for  $p < 0.05$ , and  $p$  values are labeled as \* $p < 0.05$ , \*\* $p < 0.01$ , \*\*\* $p < 0.001$ , \*\*\*\* $p < 0.0001$ . Some of the graphical objects in the graphical abstract, [Figures 1](#) and [4](#) were created with [BioRender.com](#).

**Cell Reports Medicine, Volume 5**

**Supplemental information**

**A glia-enriched stem cell 3D model of the human  
brain mimics the glial-immune  
neurodegenerative phenotypes of multiple sclerosis**

**Francesca Fagiani, Edoardo Pedrini, Stefano Taverna, Elena Brambilla, Valentina Murtaj, Paola Podini, Francesca Ruffini, Erica Butti, Clarissa Braccia, Annapaola Andolfo, Roberta Magliozzi, Lena Smirnova, Tanja Kuhlmann, Angelo Quattrini, Peter A. Calabresi, Daniel S. Reich, Gianvito Martino, Paola Panina-Bordignon, and Martina Absinta**

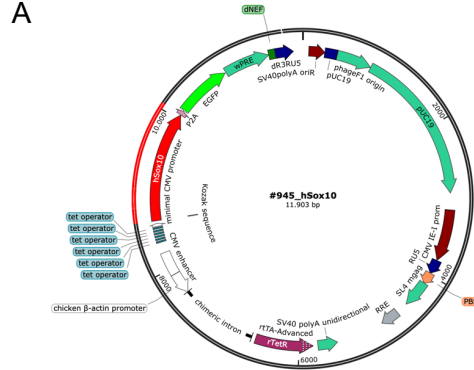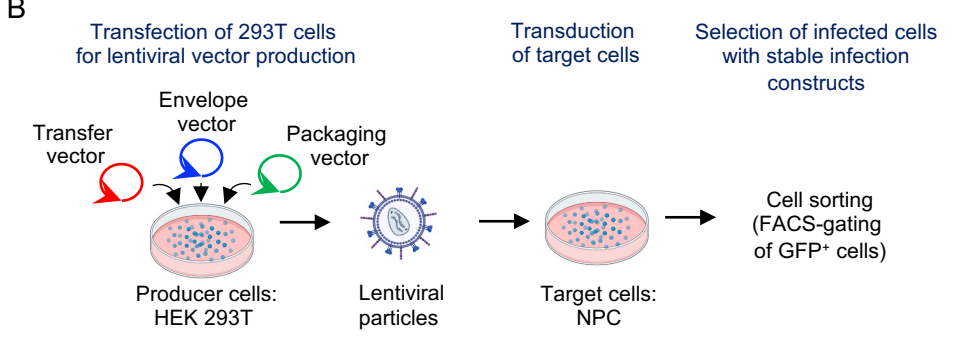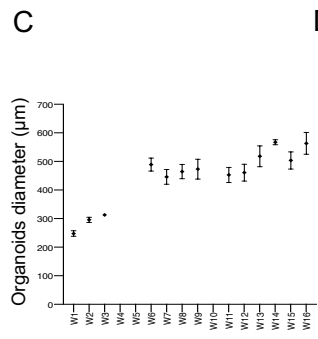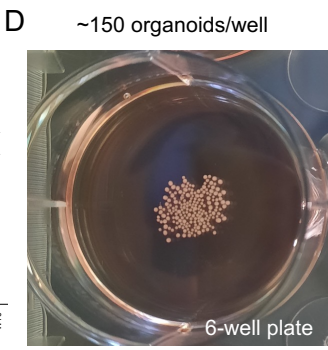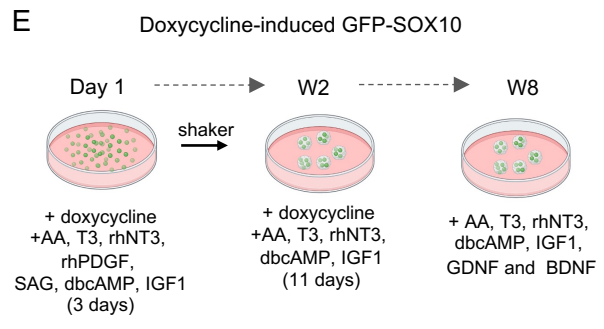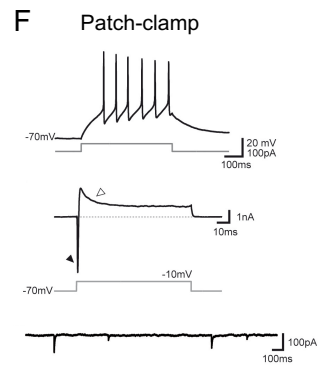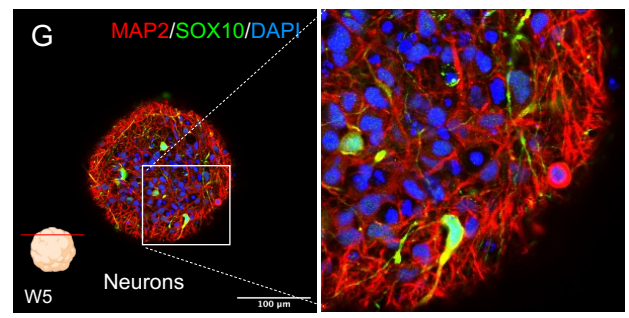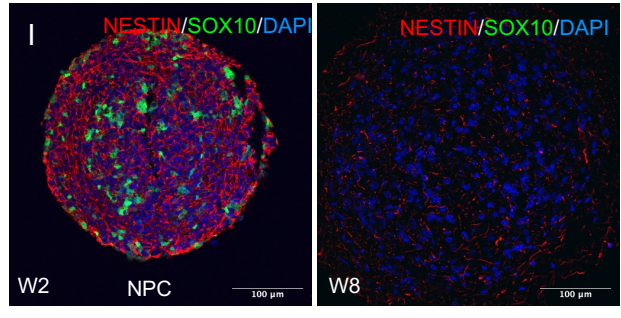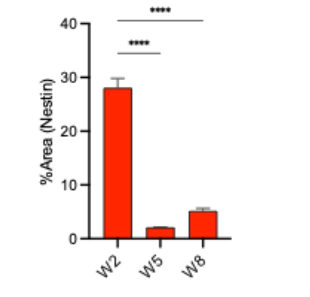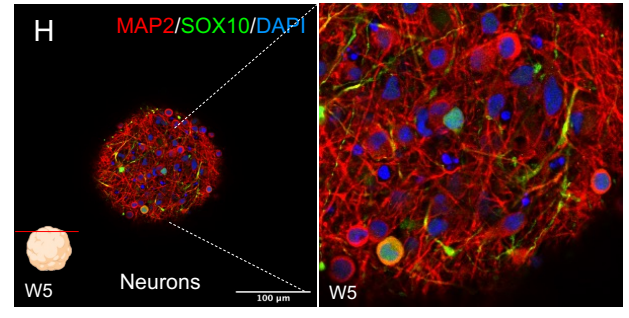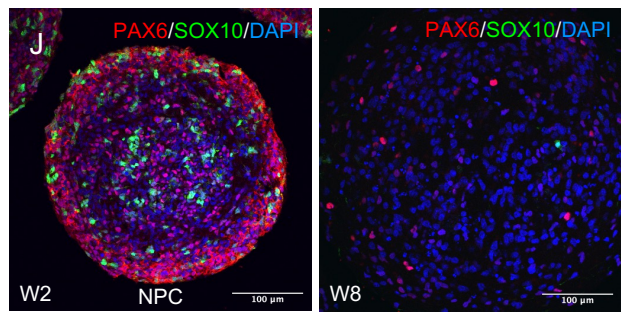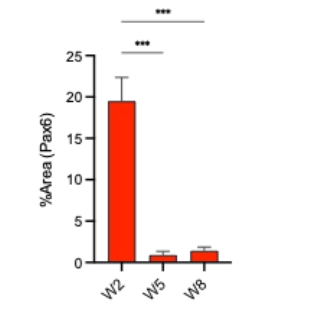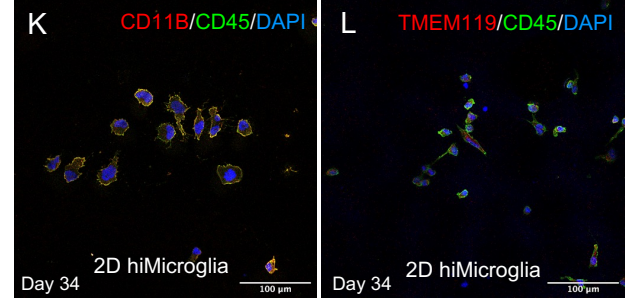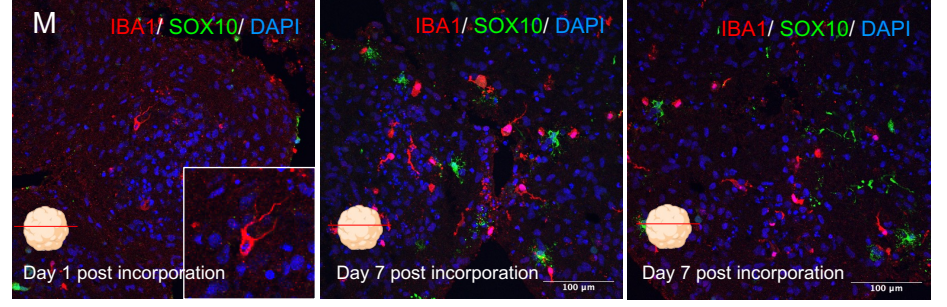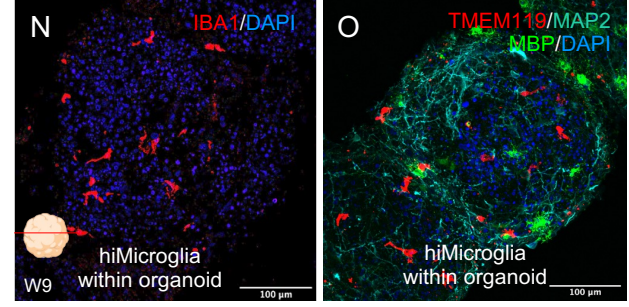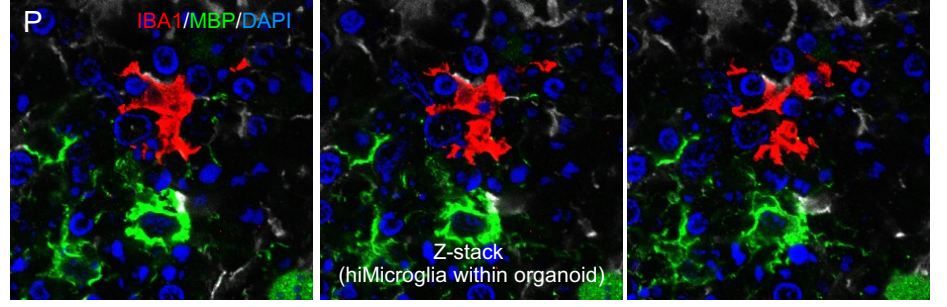

**Figure S1. SOX10-eGFP organoids' production and characterization by immunofluorescence. Related to Figure 1.**

- (A) Lentiviral vector encoding the SOX10 coding sequence and GFP as reporter gene under the control of doxycycline-inducible promoter.
- (B) Schematic for transfection of 293T HEK cells with transfer, envelope, and packaging vectors for lentiviral particles production, transduction of target cells (*i.e.*, NPCs) and selection of infected NPCs with stable infection constructs by FACS-gating of GFP<sup>+</sup> cells.
- (C) Organoids' diameter ( $\mu\text{m}$ ) over time (W=weeks) ( $n=10$  organoids per time point).
- (D) Representative image of organoids ( $n \sim 150$  organoids) in a well of a 6-well-plate.
- (E) Schematic for doxycycline-induced SOX10 induction during the 8-week protocol (see **STAR METHODS** for a detailed description).
- (F) Electrophysiological organoid recording: example of action potential firing (black trace) in response to injection of a suprathreshold current step (50 pA, 500 ms; gray trace); representative trace showing an inward Na<sup>+</sup> (black arrowhead) and an outward K<sup>+</sup> current (white arrowhead) evoked by a voltage step from -70 to -10 mV (100 ms, gray trace); example of spontaneous postsynaptic currents (excerpted from a longer trace lasting 1 minute) recorded at -60 mV in voltage-clamp mode.
- (G-H) Representative images of free-floating organoids exposed to doxycycline after 5 weeks of differentiation. Immunostaining of MAP<sup>+</sup> neurons and OPCs endogenously expressing SOX10. Nuclei are marked with DAPI.
- (I) Immunostaining of NESTIN<sup>+</sup> and SOX10<sup>+</sup> cells (30X) out of DAPI in whole cryosections from 2- and 8-week-old organoids exposed to doxycycline and quantification of NESTIN<sup>+</sup> cells (% staining area) at 2, 5, and 8 weeks (one-way ANOVA and multiple comparison) ( $n=3$ ).
- (J) Immunostaining of PAX6<sup>+</sup> and SOX10<sup>+</sup> cells (30X) out of DAPI in whole cryosections from 2- and 8-week-old organoids exposed to doxycycline and quantification of PAX6<sup>+</sup> cells (% area) at 2, 5, and 8 weeks ( $n=3$ , one-way ANOVA and Tukey's multiple comparisons test, \*  $p<0.05$ , \*\*  $p<0.01$ , \*\*\*  $p<0.001$ ).
- (K-L) Immunolabeling of CD11B<sup>+</sup>, CD45<sup>+</sup> (left: 30X), TMEM119<sup>+</sup> cells (right: 30X) in 2D culture of hiMicroglia at day 34 of differentiation. Nuclei are marked with DAPI.
- (M) Immunolabeling of IBA1<sup>+</sup> and SOX10<sup>+</sup> cells (30X) out of DAPI in cryosections from 8- and 9-weeks-old organoids 1 day and 7 days after hiMicroglia incorporation.
- (N-O) Immunolabeling of IBA1<sup>+</sup> hiMicroglia (left: 30X) and TMEM119<sup>+</sup>/MBP<sup>+</sup>/MAP2<sup>+</sup> cells (right: 30X) out of DAPI in whole cryosections from 9 weeks-old organoids.
- (P) Z-stacks of IBA1<sup>+</sup> microglia and MBP<sup>+</sup> OL out of DAPI in whole cryosections from 9 weeks-old organoids.

*Abbreviations:* NPCs: neural precursor cells.

**A****Synapses**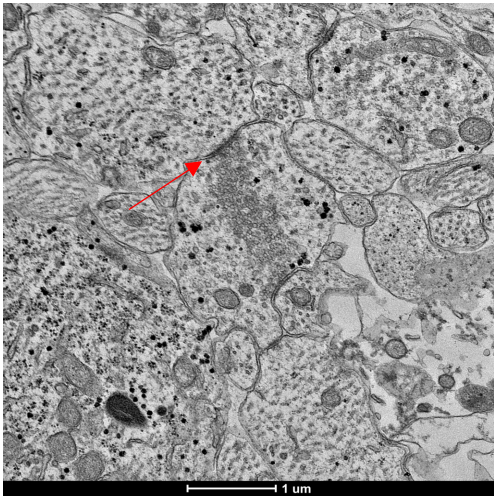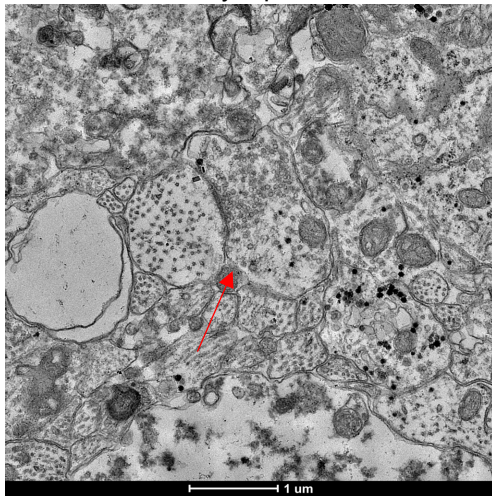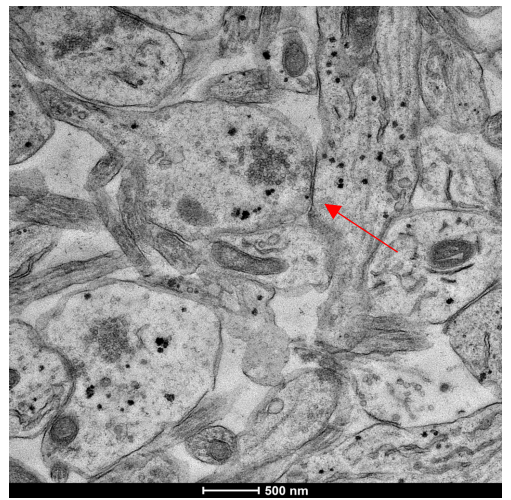**B****Axons**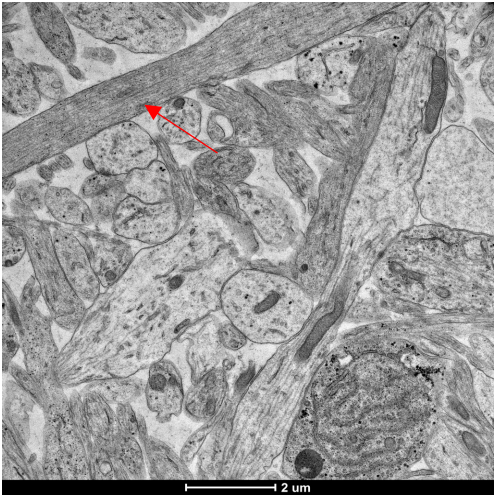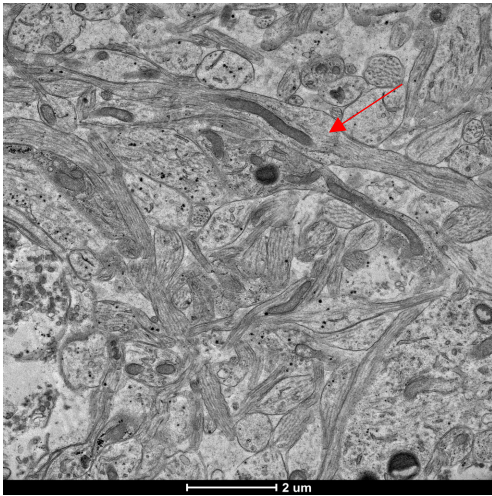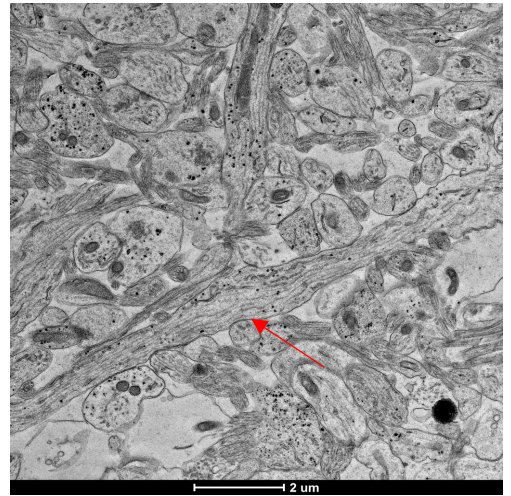**C****Myelination stages**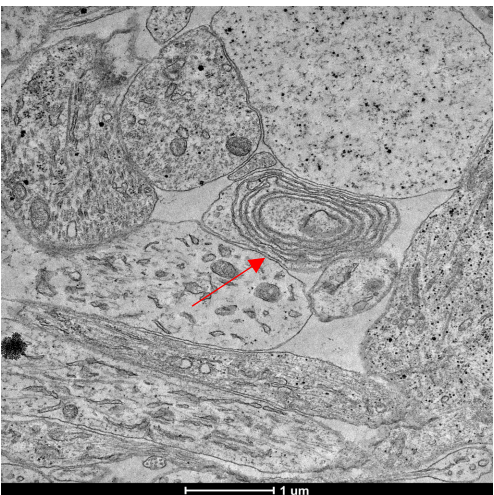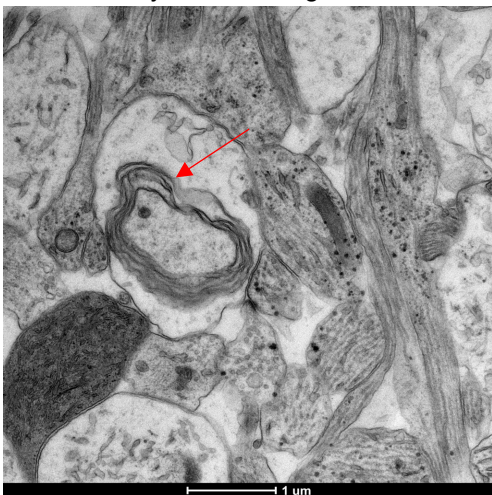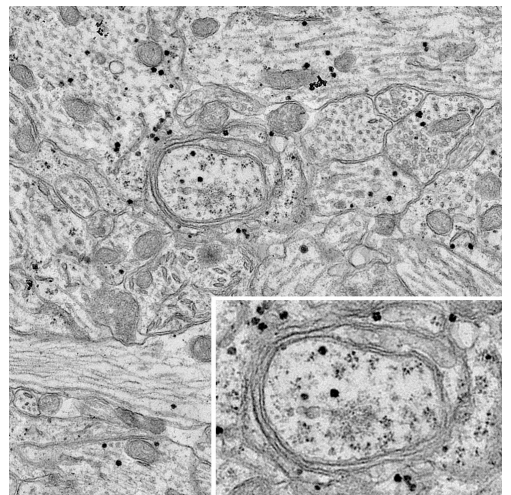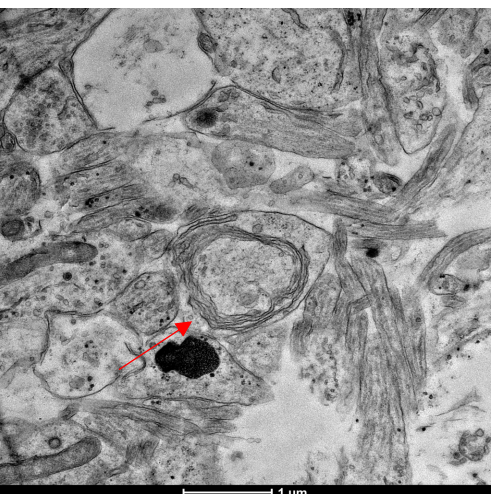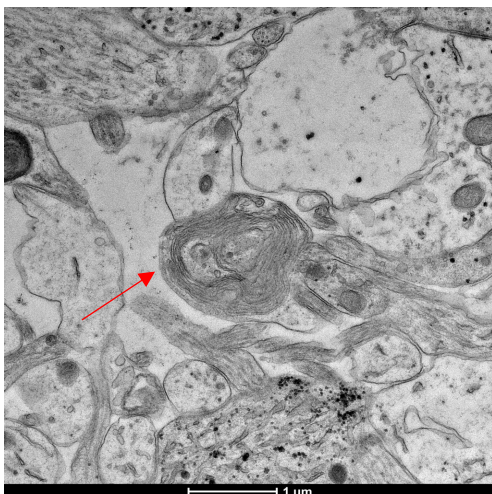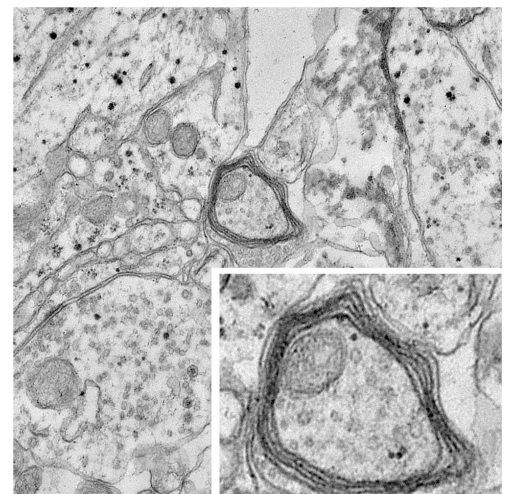

**Figure S2. Ultrastructure analysis on organoids. Related to Figure 1.**

(A-B) Ultrastructure analysis by electron microscopy at 8 weeks showed: (A) evidence of cell-to-cell junctions (red arrowhead) demonstrating functional interactions between the cells in doxycycline-treated organoids; (B) axonal projections (red arrowhead) in doxycycline-treated organoids.

(C) Transmission electron microscopy images of organoids showing early myelination processes during the differentiation protocol (2 and 5 weeks) to late time points (8 weeks). Electron microscopy was performed on organoids derived from 4 independent experiments with similar results.



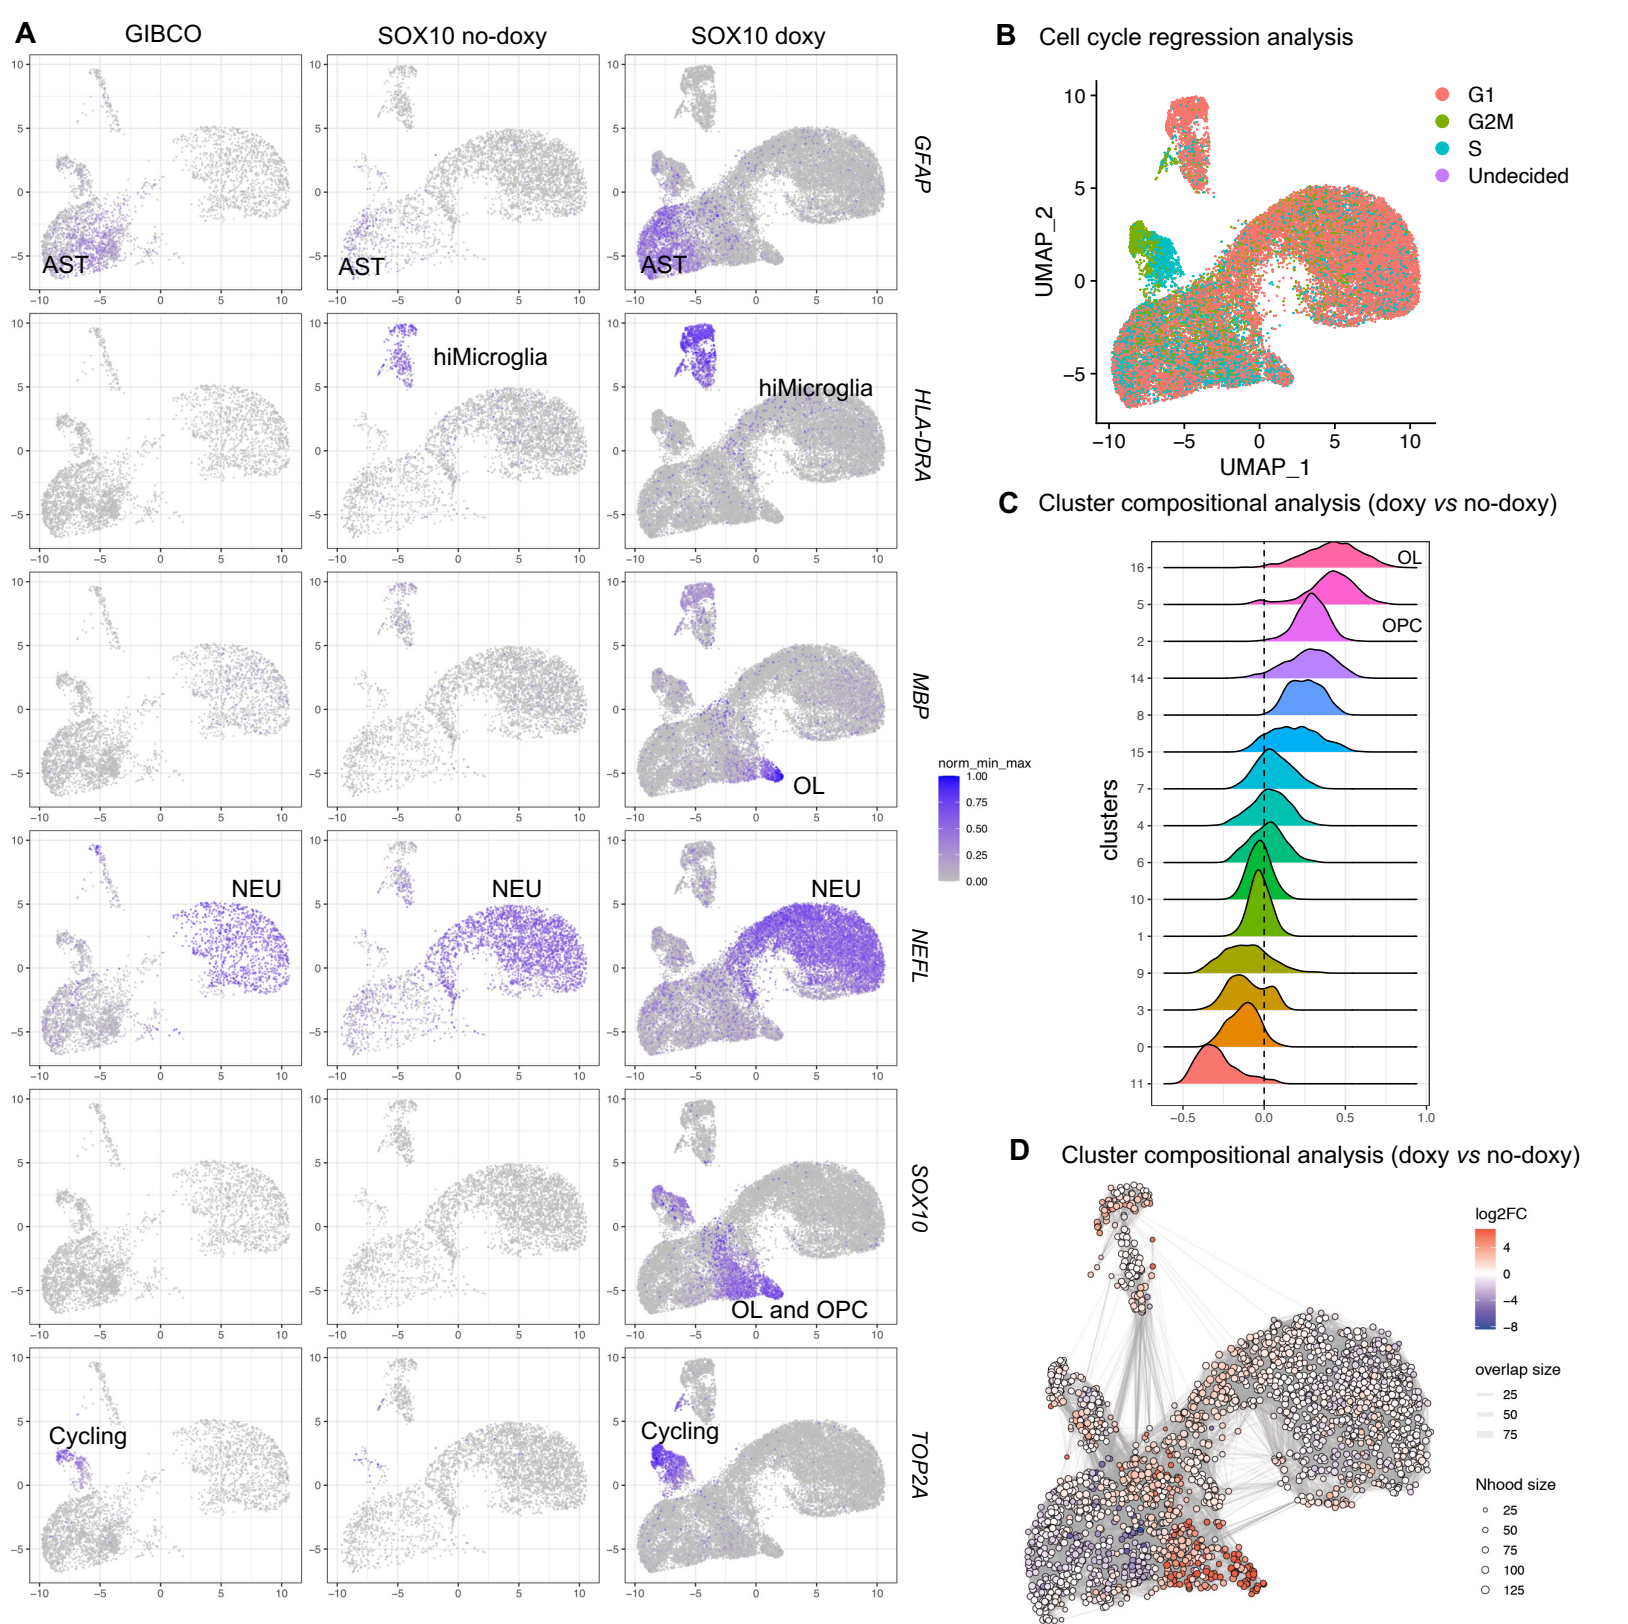

MBP<sup>+</sup> OLs in W16 organoids not exposed to doxycycline

MBP<sup>+</sup> OLs in W16 organoids exposed to doxycycline

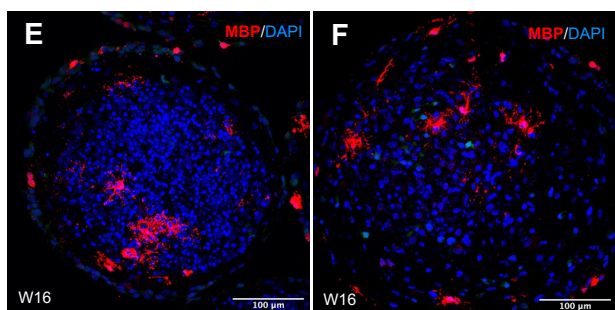

**G** SOX10-eGFP organoids onto the reference atlas

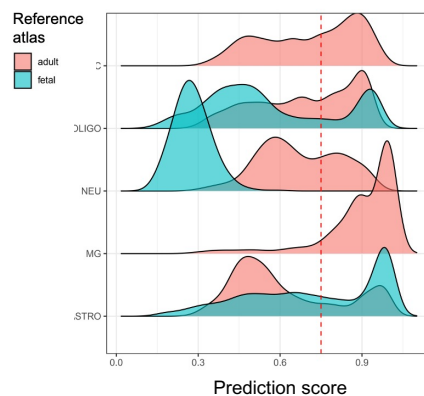

**H** Cortical organoids (Tanaka et al., 2020) onto the reference atlas

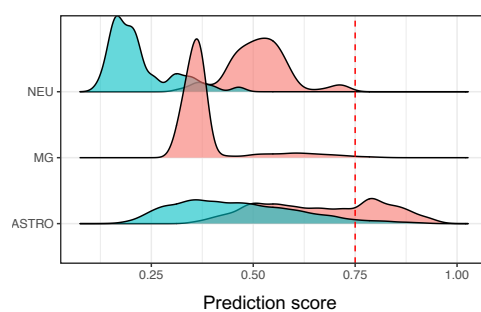

**Figure S3. Organoids' cell type and cluster composition. Related to Figure 2.**

(A) UMAP showing *GFAP*, *HLA-DRA*, *MBP*, *NEFL*, *SOX10* and *TOP2A* expression in organoids.

(B) Cell cycle regression analysis indicating cells in G1, G2M, and S phase.

(C) Organoids' cluster compositional analysis for the comparison exposed vs not exposed to doxycycline: using Cacoa algorithm, the statistical significance of loading coefficients is reached for clusters 16, 2, 15, 7, 8, 5, and 1.

(D) Organoids' cluster compositional analysis for the comparison exposed vs not exposed to doxycycline: using MiloR, the density plot of the neighbors shows that the oligolineage clusters are significantly denser in doxycycline-stimulated organoids.

(E-F) Immunostaining of MBP<sup>+</sup> OL (30X) out of DAPI in whole cryosections from 16-week-old organoids not exposed to doxycycline vs organoids exposed to doxycycline.

(G-H) SOX10-organoids (G) and human cortical organoids (scRNAseq dataset metanalysis from Tanaka et al.)

scRNAseq data were mapped on the human adult vs fetal reference atlases. The distribution of the mapping prediction scores is shown separately for adult (pink) vs fetal (cyan) atlas. The red dotted line indicates the prediction scores above 0.75, indicating high confidence supported by multiple consistent gene anchors.

*Abbreviations:* NEU: neurons; ASTRO: astrocytes; OPC: oligodendrocyte precursor cells; OL: oligodendrocytes; CYCLING: cycling cells.

### A Outgoing communication patterns of secreting cells

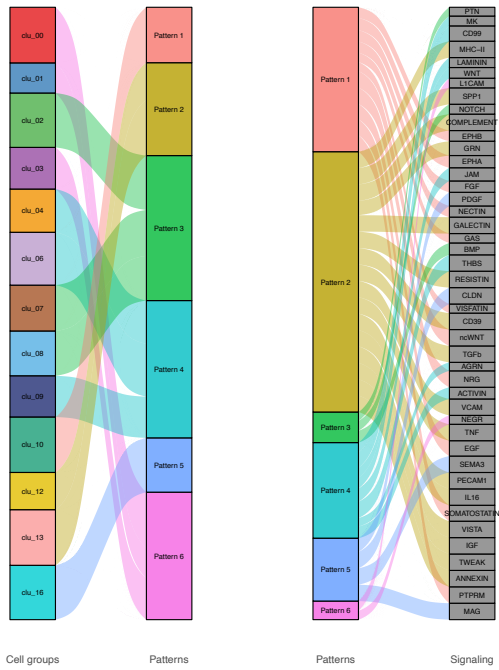

### B Incoming communication patterns of secreting cells

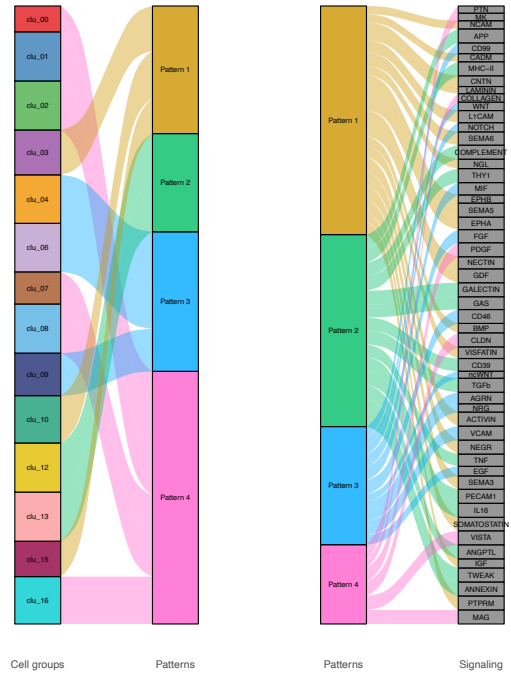

### C

### Communication patterns

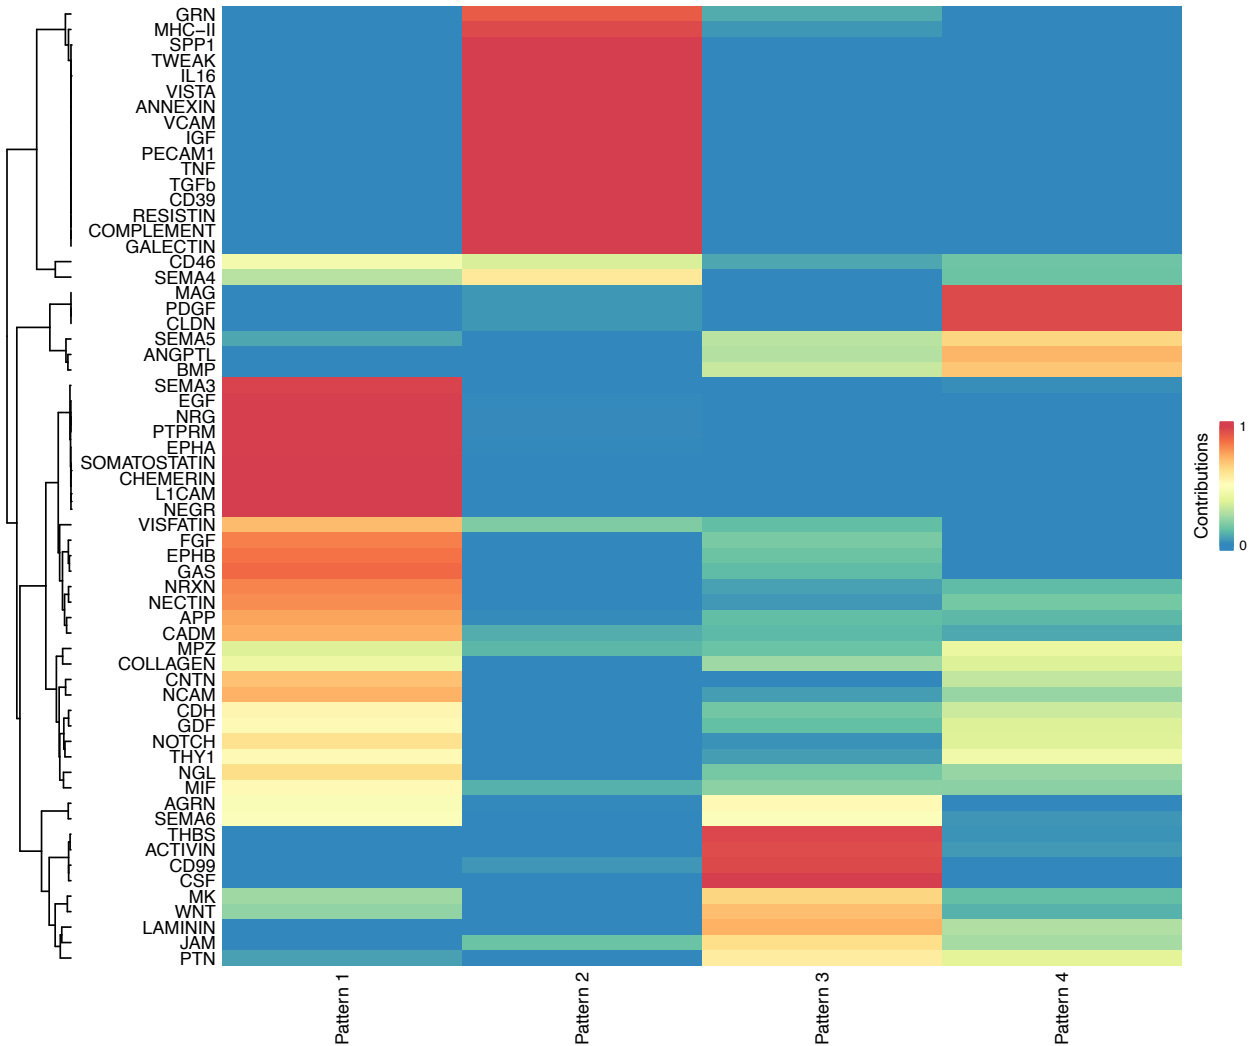

**Figure S4. Cell-to-cell communication in organoids. Related to Figure 3.**

(A) The inferred outgoing communication patterns of secreting cells, which shows the correspondence between the inferred latent patterns and cell groups, as well as signaling pathways. The thickness of the flow indicates the contribution of the cell group or signaling pathway to each latent pattern.

(B) The inferred incoming communication patterns of target cells that shows the correspondence between the inferred latent patterns and cell groups, as well as signaling pathways. The thickness of the flow indicates the contribution of the cell group or signaling pathway to each latent pattern.

(C) heatmap and dendrogram of the signaling pathways associated to the different cell patterns.

**A**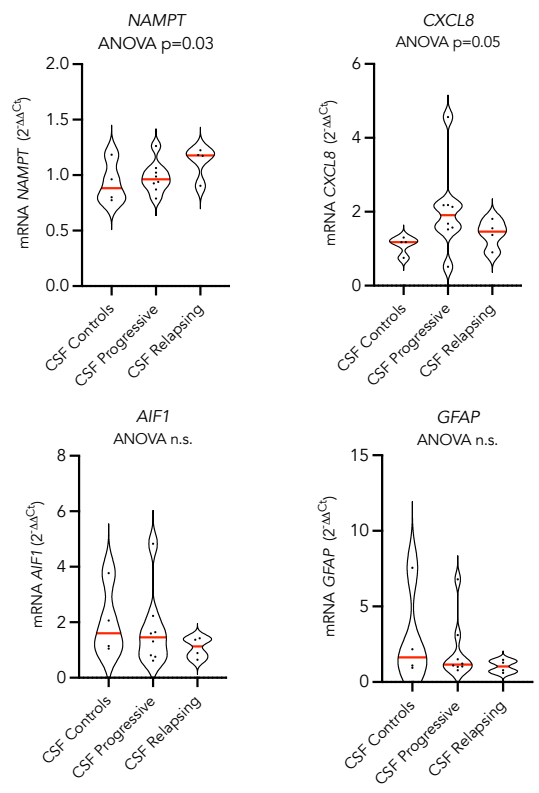**B**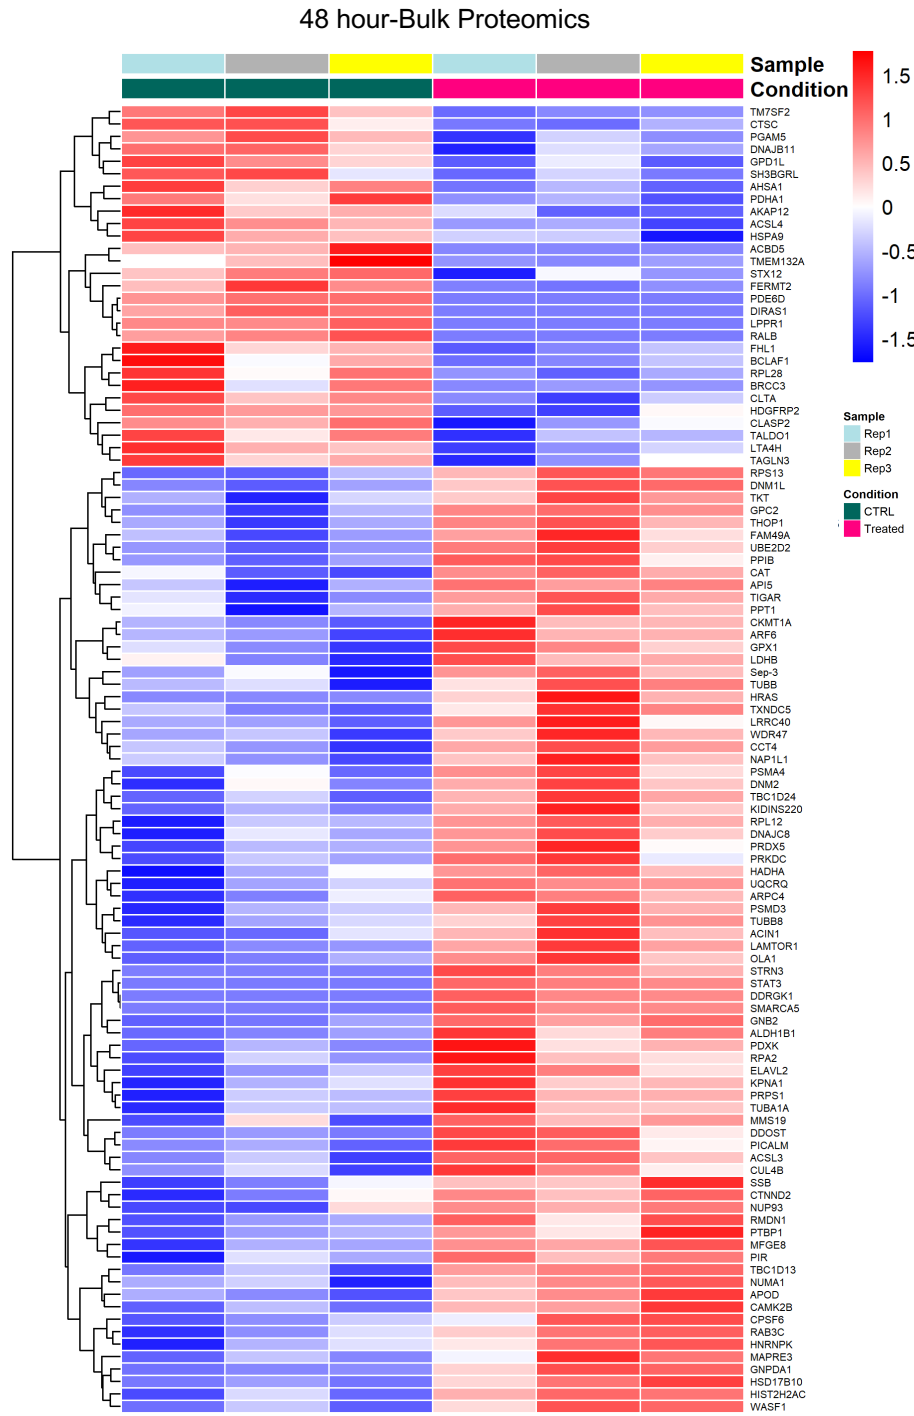**C**

GSEA enrichment score (hiMicroglia cl13 vs MIMS-iron)

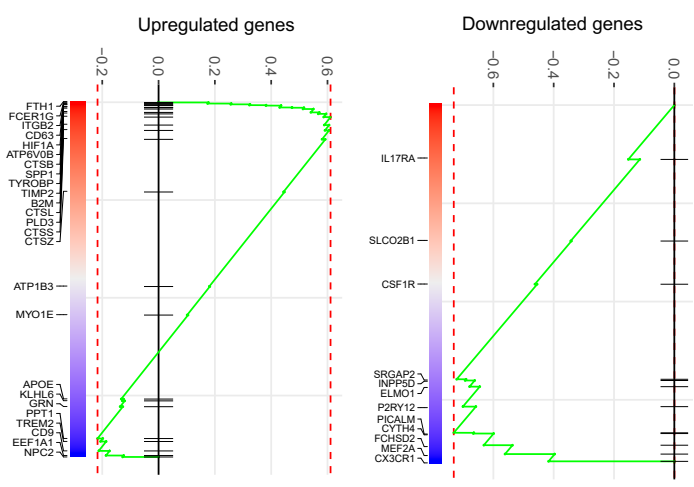**D** Reference: astrocyte subset of MS WM lesions (Absinta et al., 2021)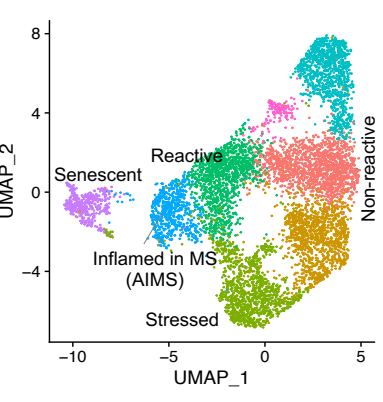**E** Organoids' astrocytes onto the reference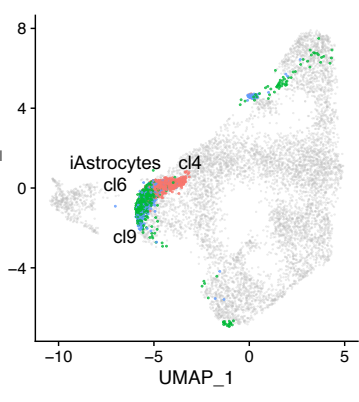**F** Reference: OPC subset of MS WM lesions (Absinta et al., 2021)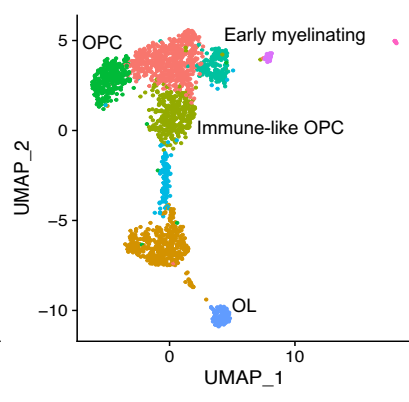**G** Organoid' OPC onto the reference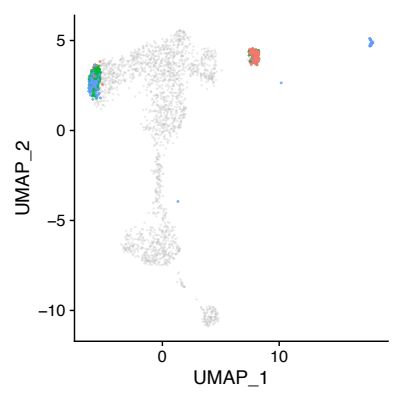

**Figure S5. Transcriptomic and proteomic of MS-CSF inflamed organoids. Related to Figure 4.**

(A) Gene expression (normalized to *GAPDH* and untreated condition) of *NAMPT*, *CXCL8*, *AIF1*, and *GFAP* in 8-week-old organoids with hiMicroglia exposed to CSF from healthy subjects ( $n=3$ ) and subjects with diagnosed MS ( $n=3$ ; 2 primary progressive and 1 relapsing remitting), as determined by RT-qPCR (one-way ANOVA and multiple comparison) ( $n=4$  RNA samples each consisting of ~200 organoids derived from 4 hiPSC lines).

(B) Heatmap and dendrogram relative to bulk proteomic analysis conducted on untreated (named “CTRL”) vs 48h CSF-treated organoids (named “Treated”).

(C) Gene set enrichment analysis (GSEA) performed in hiMicroglia (cluster 13) vs MIMS-iron for upregulated genes (left) and downregulated (right) genes. The GSEA algorithm calculates an enrichment score reflecting the degree of overrepresentation at the top or bottom of the ranked list of the genes included in a gene set in a ranked list of all genes present in our scRNA-seq datasets. A positive enrichment score indicates gene set enrichment at the top of the ranked list; a negative enrichment score indicates gene set enrichment at the bottom of the ranked list.

(D) Reference atlas based on the re-analysis of astrocyte subclustering at the chronic active MS lesion in Absinta et al.<sup>3</sup>.

(E) Mapping of 3D organoid single cell data onto the MS astrocyte subset reference.

(F) Reference atlas was based on the re-analysis of Absinta et al.,<sup>3</sup> OPC subclustering at the chronic active MS lesion.

(G) Mapping of 3D organoids single cell data onto the MS OPC subset reference (F).

A

CSF-treated vs untreated organoids  
Differential number of interactions

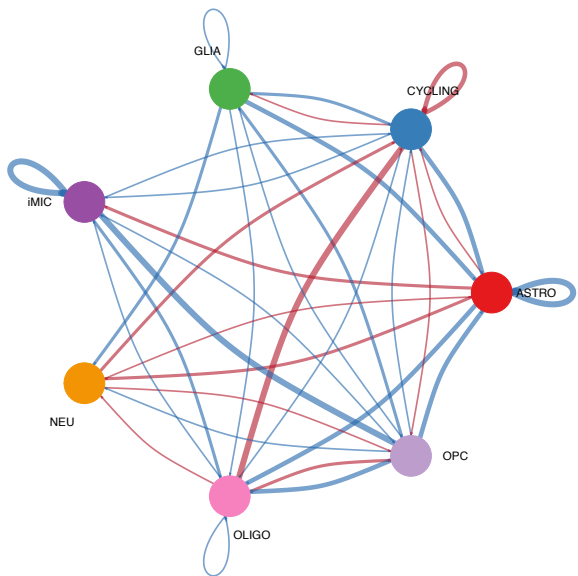

CSF-treated vs untreated organoids  
Differential interaction strength

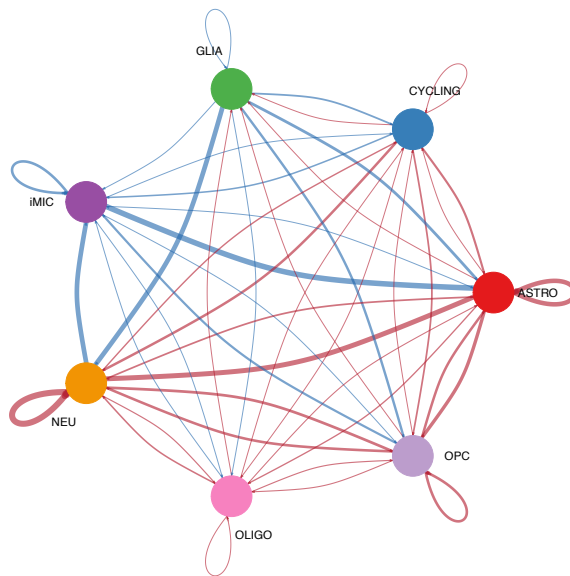

B

Upregulated signaling in CSF-treated vs untreated organoids

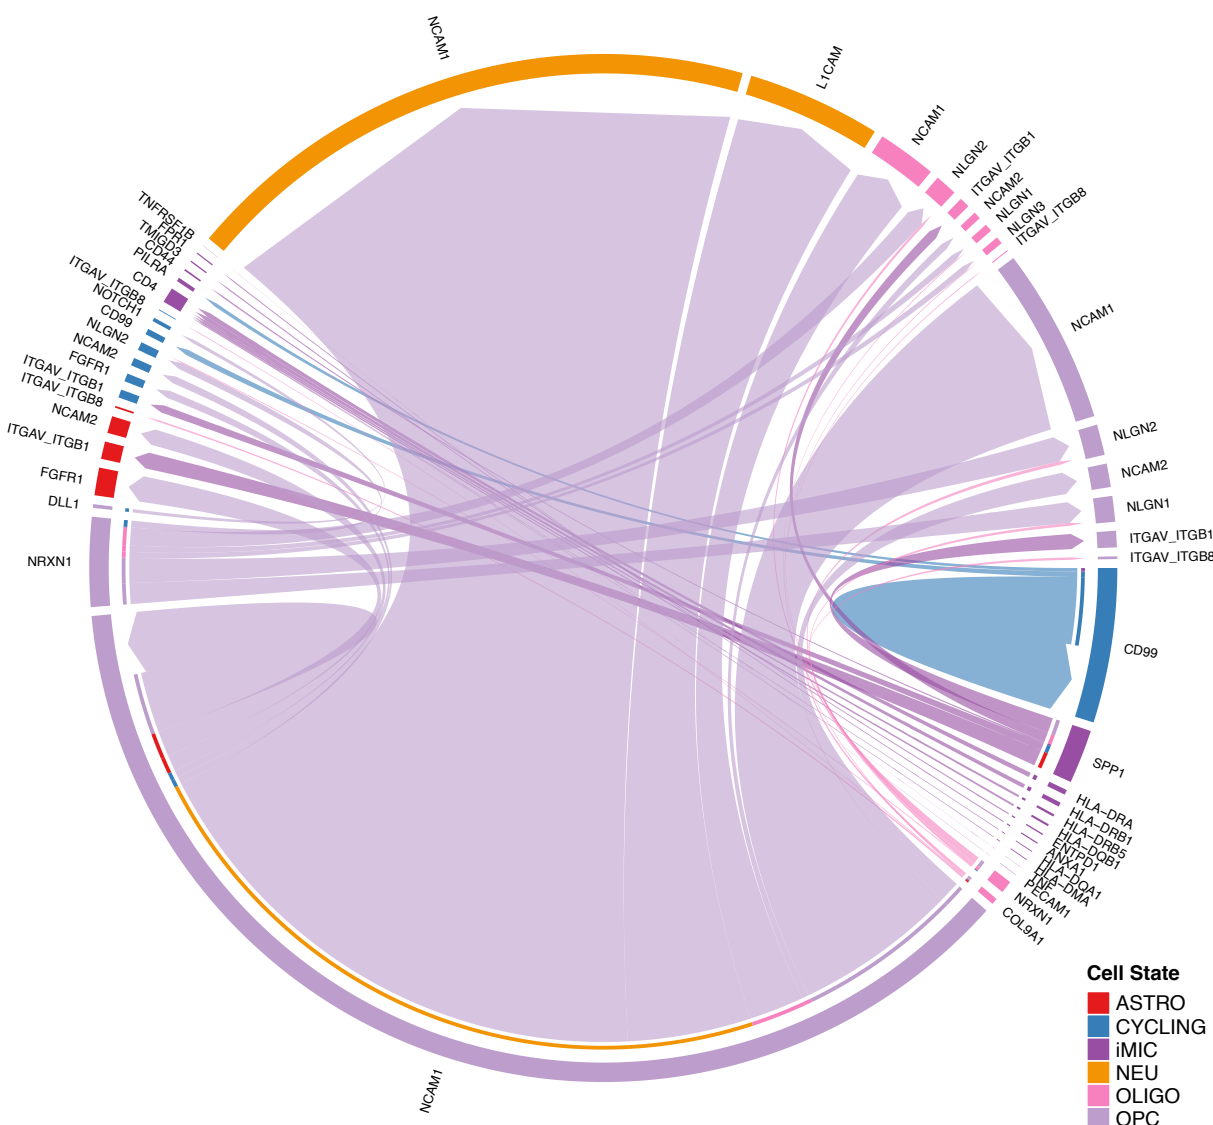

**Figure S6. Cell-to-cell communication perturbation by MS-inflamed CSF. Related to Figure 4.**

(A) CellChat circle plots showing differential number of interactions and differential interaction strength in the crosstalk among cell populations of CSF-treated vs untreated organoids. Red lines indicate that the displayed communication is increased in CSF-treated organoids compared with untreated organoids, whereas blue lines indicate that the displayed communication is decreased in CSF-treated organoids. The line thickness is proportional to the number of interaction (circle plot on the left) or to the interaction strength (circle plot on the right).

(B) CellChat chord plot showing upregulated signaling in CSF-treated vs untreated organoids. The edge width is proportional to the indicated number of ligand-receptor pairs. Each cell population is color-coded.
